# Supplementary material for: Protocol for a multicentre cross-sectional, longitudinal ambulatory clinical trial in rheumatoid arthritis and Parkinson’s disease patients analysing the relation between the gut microbiome, fasting and immune status in Germany (ExpoBiome)
Source: PubMed Central journal article supplement (PMC10441058; doi:10.1136/bmjopen-2022-071380), 2023-08-18
Supplement: bmjopen-2022-071380.draft_revisions.pdf [file bmjopen-2022-071380.draft_revisions.pdf]

# BMJ Open

BMJ Open is committed to open peer review. As part of this commitment we make the peer review history of every article we publish publicly available.

When an article is published we post the peer reviewers' comments and the authors' responses online. We also post the versions of the paper that were used during peer review. These are the versions that the peer review comments apply to.

The versions of the paper that follow are the versions that were submitted during the peer review process. They are not the versions of record or the final published versions. They should not be cited or distributed as the published version of this manuscript.

BMJ Open is an open access journal and the full, final, typeset and author-corrected version of record of the manuscript is available on our site with no access controls, subscription charges or pay-per-view fees (<http://bmjopen.bmj.com>).

If you have any questions on BMJ Open's open peer review process please email [info.bmjopen@bmj.com](mailto:info.bmjopen@bmj.com)

# BMJ Open

## Protocol for a multicentre cross-sectional, longitudinal study in rheumatoid arthritis and Parkinson's disease patients analysing the relation between the gut microbiome, fasting and immune status (ExpoBiome)

|                               |                                                                                                                                                                                                                                                                                                                                                                                                                                                                                                                                                                                                                                                                                                                                                                                                                                                                                                                                                                                                                                                                                                                                                                                                                                                                                                                                                                                                                                                                                                                                                                                                                                                                                      |
|-------------------------------|--------------------------------------------------------------------------------------------------------------------------------------------------------------------------------------------------------------------------------------------------------------------------------------------------------------------------------------------------------------------------------------------------------------------------------------------------------------------------------------------------------------------------------------------------------------------------------------------------------------------------------------------------------------------------------------------------------------------------------------------------------------------------------------------------------------------------------------------------------------------------------------------------------------------------------------------------------------------------------------------------------------------------------------------------------------------------------------------------------------------------------------------------------------------------------------------------------------------------------------------------------------------------------------------------------------------------------------------------------------------------------------------------------------------------------------------------------------------------------------------------------------------------------------------------------------------------------------------------------------------------------------------------------------------------------------|
| Journal:                      | <i>BMJ Open</i>                                                                                                                                                                                                                                                                                                                                                                                                                                                                                                                                                                                                                                                                                                                                                                                                                                                                                                                                                                                                                                                                                                                                                                                                                                                                                                                                                                                                                                                                                                                                                                                                                                                                      |
| Manuscript ID                 | bmjopen-2022-071380                                                                                                                                                                                                                                                                                                                                                                                                                                                                                                                                                                                                                                                                                                                                                                                                                                                                                                                                                                                                                                                                                                                                                                                                                                                                                                                                                                                                                                                                                                                                                                                                                                                                  |
| Article Type:                 | Protocol                                                                                                                                                                                                                                                                                                                                                                                                                                                                                                                                                                                                                                                                                                                                                                                                                                                                                                                                                                                                                                                                                                                                                                                                                                                                                                                                                                                                                                                                                                                                                                                                                                                                             |
| Date Submitted by the Author: | 23-Dec-2022                                                                                                                                                                                                                                                                                                                                                                                                                                                                                                                                                                                                                                                                                                                                                                                                                                                                                                                                                                                                                                                                                                                                                                                                                                                                                                                                                                                                                                                                                                                                                                                                                                                                          |
| Complete List of Authors:     | <p>Hansen, Bérénice; LCSB<br/> Laczny, Cédric C.; LCSB<br/> Aho, Velma T.E.; LCSB<br/> Frachet-Bour, Audrey; LCSB<br/> Habier, Janine; LCSB<br/> Ostaszewski, Marek; LCSB<br/> Michalsen, Andreas; Charité Universitätsmedizin Berlin, Institute for Social Medicine, Epidemiology and Health Economics; Immanuel Hospital Berlin-Wannsee Branch, Department of Internal and Integrative Medicine<br/> Hanslian, Etienne; Charite Universitätsmedizin Berlin, Institute for Social Medicine, Epidemiology and Health Economics; Immanuel Hospital Berlin-Wannsee Branch<br/> Koppold-Liebscher, Daniela; Charité Universitätsmedizin Berlin, Institute for Social Medicine, Epidemiology and Health Economics; Immanuel Hospital Berlin-Wannsee Branch<br/> Hartmann, Anika; Charité Universitätsmedizin Berlin, Institute of Social Medicine, Epidemiology and Health Economics; Charité Universitätsmedizin Berlin, Department of Dermatology, Venereology and Allergology<br/> Steckhan, Nico; Charité Universitätsmedizin Berlin, Institute for Social Medicine, Epidemiology and Health Economics; University of Potsdam, Digital Health - Connected Healthcare, Hasso Plattner Institute<br/> Mollenhauer, Brit; University Medical Center Göttingen; Paracelsus-Kliniken Deutschland GmbH<br/> Schade, Sebastian; University Medical Center Göttingen; Paracelsus-Kliniken Deutschland GmbH,<br/> Roomp, Kirsten; LCSB<br/> Schneider, Jochen; LCSB; Saarland University Hospital and Saarland University Faculty of Medicine, Department of Internal Medicine and Psychiatry<br/> Wilmes, Paul; LCSB; University of Luxembourg, Department of Life Sciences and Medicine</p> |
| Keywords:                     | IMMUNOLOGY, Rheumatology < INTERNAL MEDICINE, MICROBIOLOGY, Parkinson-s disease < NEUROLOGY, NUTRITION & DIETETICS, Clinical trials < THERAPEUTICS                                                                                                                                                                                                                                                                                                                                                                                                                                                                                                                                                                                                                                                                                                                                                                                                                                                                                                                                                                                                                                                                                                                                                                                                                                                                                                                                                                                                                                                                                                                                   |
|                               |                                                                                                                                                                                                                                                                                                                                                                                                                                                                                                                                                                                                                                                                                                                                                                                                                                                                                                                                                                                                                                                                                                                                                                                                                                                                                                                                                                                                                                                                                                                                                                                                                                                                                      |

1  
2  
3  
4  
5  
6  
7  
8  
9  
10  
11  
12  
13  
14  
15  
16  
17  
18  
19  
20  
21  
22  
23  
24  
25  
26  
27  
28  
29  
30  
31  
32  
33  
34  
35  
36  
37  
38  
39  
40  
41  
42  
43  
44  
45  
46  
47  
48  
49  
50  
51  
52  
53  
54  
55  
56  
57  
58  
59  
60

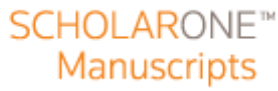

1  
2  
3  
4 1 **Protocol for a multicentre cross-sectional, longitudinal study in**  
5  
6 2 **rheumatoid arthritis and Parkinson's disease patients analysing the**  
7  
8 3 **relation between the gut microbiome, fasting and immune status**  
9  
10 **(ExpoBiome)**  
11  
12  
13

14 6 Bérénice Hansen<sup>1</sup>, Cédric C. Laczny<sup>1</sup>, Velma T.E. Aho<sup>1</sup>, Audrey Frachet-Bour<sup>1</sup>, Janine Habier<sup>1</sup>, Marek  
15 7 Ostaszewski<sup>1</sup>, Andreas Michalsen<sup>4,5</sup>, Etienne Hanslian<sup>4,5</sup>, Daniela A. Koppold<sup>4,5,8</sup>, Anika Hartmann<sup>4,10</sup>,  
16 8 Nico Steckhan<sup>4,9</sup>, Brit Mollenhauer<sup>6,7</sup>, Sebastian Schade<sup>6,7</sup>, Kirsten Roomp<sup>1</sup>, Jochen G. Schneider<sup>1,3+</sup>,  
17 9 Paul Wilmes<sup>1,2+</sup>

18  
19 11 <sup>1</sup>Luxembourg Centre for Systems Biomedicine, University of Luxembourg, Campus Belval, 7, avenue des Hauts-  
20 12 Fourneaux, L-4362 Esch-sur-Alzette, Luxembourg

21  
22 14 <sup>2</sup>Department of Life Sciences and Medicine, University of Luxembourg, 7, avenue des Hauts-Fourneaux, L-4362  
23 15 Esch-sur-Alzette, Luxembourg

24  
25 17 <sup>3</sup>Department of Internal Medicine and Psychiatry, Saarland University Medical Center, D- 66421 Homburg Saar,  
26 18 Germany

27  
28 20 <sup>4</sup>Institute for Social Medicine, Epidemiology and Health Economics, Charité – Universitätsmedizin Berlin,  
29 21 corporate member of Freie Universität Berlin, Humboldt-Universität zu Berlin, and Berlin Institute of Health

30  
31 23 <sup>5</sup>Department of Internal and Integrative Medicine, Immanuel Hospital Berlin, Germany

32  
33 25 <sup>6</sup>Paracelsus-Elena-Klinik, Kassel, Germany

34  
35 27 <sup>7</sup>University Medical Center Göttingen, Germany

36  
37 29 <sup>8</sup>Department of Pediatrics, Division of Oncology and Hematology, Charité – Universitätsmedizin Berlin,  
38 30 Corporate Member of Freie Universität Berlin, Humboldt-Universität zu Berlin and Berlin Institute of Health,  
39 31 Berlin, Germany

40  
41 33 <sup>9</sup>Digital Health - Connected Healthcare, Hasso Plattner Institute, University of Potsdam, Potsdam, Germany

42  
43 35 <sup>10</sup>Department of Dermatology, Venereology and Allergology, Charité—Universitätsmedizin Berlin, Corporate  
44 36 Member of Freie Universität Berlin and Humboldt-Universität zu Berlin, Berlin, Germany

45  
46 38 +contributed equally

47  
48 39 \*Correspondence to:

49 40 Jochen Schneider (jochen.schneider@uni.lu)

50 41 Paul Wilmes (paul.wilmes@uni.lu)

51 42 Luxembourg Centre for Systems Biomedicine,

52 43 University of Luxembourg, Campus Belval,

53 44 7, avenue des Hauts-Fourneaux,

54 45 L-4362 Esch-sur-Alzette, Luxembourg

55  
56 49 Word count: 4143

## Abstract

### Introduction

Chronic inflammatory diseases such as rheumatoid arthritis (RA) and neurodegenerative disorders like Parkinson's disease (PD) have recently been associated with a decreased diversity in the gut microbiome, emerging as key driver of various diseases. The specific interactions between gut-borne microorganisms and host pathophysiology remain largely unclear so far. The microbiome can be modulated by interventions comprising modulated nutrition and food intake.

The aim of our clinical study is to examine (1) the effects of prolonged fasting and time-restricted eating (TRE) on the outcome parameters and the immunophenotypes of RA and PD with (2) special consideration of microbial taxa and molecules associated with the changes expected in (1) and (3) to identify factors that impact the disease course and treatment by in depth screening of microorganisms and molecules in personalised HuMiX gut-on-chip models, ideally to find novel targets for anti-inflammatory therapy.

### Methods and Analysis

This trial is an open-label, multicentre, controlled clinical trial consisting of a cross-sectional and a longitudinal study. A total of 180 patients is recruited. For the cross-sectional study, patients with PD, patients with RA and healthy controls are recruited at two different, specialized clinical sites. For the longitudinal part, patients with PD and RA undergo 5-7 days of prolonged fasting (PF) followed by TRE (16:8) for a period of 12 months. One baseline visit takes place before the PF intervention and 10 follow-up visits will follow over a period of 12 months.

### Ethics and dissemination

Ethical approval was obtained to plan and conduct the trial from the institutional review board of the Charité-Universitätsmedizin Berlin (EA1/204/19), the ethics committee of the state medical association (Landesärztekammer) of Hessen (2021-2230-zvBO) and the Ethics Review Panel (ERP) of the University of Luxembourg (ERP 21-001-A ExpoBiome). The results of this study will be disseminated through peer-reviewed publications and scientific presentations.

### Trial registration number at [clinicaltrials.gov](https://clinicaltrials.gov):

NCT04847011

**Key words:** Microbiome, fasting therapy, intermittent fasting, time restricted eating, chronic disease, rheumatoid arthritis, Parkinson's disease, nutrition, chronic diseases, ExpoBiome, inflammation, gut on a chip, HuMiX, immunophenotype

## 91 Strengths and limitations of the study

- 92 • The participants of the longitudinal study will be closely monitored for 12 months and  
93 routine blood parameters as well as anthropometric data and questionnaires will be  
94 precisely documented
- 95 • This study will identify novel microbiome-derived common and disease-associated  
96 molecules involved in immune system modulation in two major chronic diseases: RA  
97 and PD.
- 98 • This study aims at also identifying novel targeted pathways to control chronic  
99 inflammatory conditions in the future
- 100 • A limitation is the heterogeneity of the cohorts regarding age and sex, which is due to  
101 the prevalence of the diseases: RA is more common in women, while PD is more  
102 common in men and has a later disease onset.
- 103 • A bias exists in choosing RA and PD as chronic disorders to study immunophenotypes  
104 although generalisable results are targeted

## 106 Introduction (1018)

107  
108 The human microbiome is emerging as a key driver of various diseases through its complex of  
109 distinct yet connected biomolecules (referred to as the “*expobiome*”)[1, 2]. The expobiome is  
110 comprised of a diverse set of nucleic acids, polypeptides and metabolites which, in the gut  
111 alone, are present in substantial concentrations[1]. However, the specific interactions  
112 between gut-borne microorganisms and host (patho)physiology remain largely unknown.  
113 Although host genetics shape the composition of the gut microbiome, the latter is particularly  
114 influenced by non-genetic factors such as lifestyle and diet[3, 4]. Therefore, the microbiome  
115 is a plausible target to modify health outcomes.

116  
117 Individuals suffering from chronic diseases, including autoimmune, metabolic, and  
118 neurodegenerative diseases as well as cancer, often present alterations from a gut  
119 microbiome composition associated with health. These shifts are typically characterised by  
120 an overgrowth of one or several microbial species with likely adverse effects including  
121 pathobionts, as well as a decrease in beneficial taxa[5]. Such imbalances are referred to as  
122 dysbiosis. Although structural microbiome changes are clearly detectable, the mechanistic or  
123 functional consequences of dysbiosis are still largely unknown. They may, however, result in  
124 dysregulated interactions with the immune system[6]. Considering the intricacy of the  
125 immune system, the question arises whether the observed microbiome changes are cause or  
126 consequence of disease. This implies that, in addition to the genetic predisposition of the  
127 host, the gut microbiome needs to be considered as a potential pathogenic factor or major  
128 driver in disease onset and course[3, 4].

129  
130 RA and PD are two specific examples representing dysregulated microbiome-immune system  
131 interactions [7, 8]. RA is a multifactorial, chronic and systemic autoimmune disease, primarily  
132 affecting the lining of the synovial joints with a higher risk and younger age for disease onset  
133 in women and a global prevalence of 1%[9, 10]. The exact disease pathogenesis is still unclear  
134 and no cure for RA currently exists. In addition to the common local articular symptoms of

1  
2  
3 135 RA, systemic comorbidities can affect the vasculature, metabolism and bones[11]. Besides  
4 136 various environmental risk factors e.g. smoking and a Western diet, the host microbiome is  
5 137 associated with the pathophysiology of the disease[12]. The diversity of the gut microbiome  
6 138 has been reported to be decreased in individuals with RA, compared with the general  
7 139 population, and is correlated with disease duration and autoantibody levels[13]. Studies in  
8 140 murine models also report that autoimmune arthritis is strongly attenuated under germ-free  
9 141 conditions[14]. The introduction of specific bacteria, e.g. segmented filamentous bacteria,  
10 142 into germ-free animals or oral infection with *Porphyromonas gingivalis* drive autoimmune  
11 143 arthritis through activation of T helper cells[14]. Several different taxa, including *Prevotella*  
12 144 *copri*, *Lactobacillus* spp. and *Colinsella* spp. are enriched in the gut microbiome of patients  
13 145 with RA and correlate positively with disease markers e.g. immunoglobulins IgA and IgG ,  
14 146 while other taxa like *Haemophilus* spp. and *Faecalibacterium* spp. are typically found at lower  
15 147 abundances in patients with RA compared to healthy individuals[13, 15, 16]. Alterations of  
16 148 the gut microbiome may therefore have an important impact on RA pathophysiology[12].  
17 149

18 150 PD affects 0.4-2% of the population above 65 years worldwide and is the second most  
19 151 common progressive neurodegenerative disease with men being 1.5 times more likely to be  
20 152 affected than women[17]. The cardinal symptoms are motor deficiencies such as tremor and  
21 153 rigidity, but also include a wide range of non-motor symptoms, such as hyposmia, depression,  
22 154 insomnia or cognitive impairment, severely impacting patients' quality of life[18].  
23 155 Aggregations of the protein  $\alpha$ -synuclein in the dopaminergic substantia nigra represent the  
24 156 main neuropathological manifestations[19]. Recent literature suggests that  
25 157 neuroinflammation plays a key role in early phases of PD-like neurodegeneration, with  
26 158 microglia as the main cellular effectors[20]. Dysbiosis of the gut microbiome has been  
27 159 associated with the characteristic motor deficits and pathophysiologic changes in the enteric  
28 160 and central nervous systems in animal studies. Increased relative abundances of the genera  
29 161 *Akkermansia*, *Bifidobacterium*, *Lactobacillus*, and *Methanobrevibacter* and decreased  
30 162 abundances in *Faecalibacterium* and *Roseburia* have been reported[21, 22]. The PD-  
31 163 associated loss of dopaminergic neurons involves mechanisms of inflammatory and  
32 164 autoimmune responses. The majority of patients with PD suffer from gastrointestinal  
33 165 symptoms, e.g. constipation and irritable bowel syndrome (IBS) -like symptoms[23]. Recently  
34 166 it has been suggested that the gut-brain axis, e.g. by-products produced by the gut  
35 167 microbiome, may contribute to the production of  $\alpha$ -synuclein aggregates in the enteric  
36 168 nervous system[24]. In addition, increased intestinal permeability[25] and enteric  
37 169 inflammation occur in PD and substantiate a role of peripheral inflammation in the initiation  
38 170 and the progression of the disease[26].  
39 171

40 172 One factor with known major impact on the gut microbiome and on chronic diseases is diet[7].  
41 173 Dietary approaches, including fasting, have been used as therapeutic interventions at least  
42 174 since the 5<sup>th</sup> century BCE[27, 28]. However, the available evidence from robust comparable  
43 175 clinical studies is lacking. While PF of 7–10 days has been associated with improvements in  
44 176 RA[29, 30], the mechanism behind the decrease in inflammatory processes during caloric  
45 177 deprivation remains unclear. The improvements can typically only be maintained for a limited  
46 178 period of time, and the symptoms can reappear after reintroduction of the patients' standard  
47 179 diet. In mouse models of PD, intermittent fasting (IF) has led to several improvements  
48 180 including decreased excitotoxicity, reduced neurodegeneration and protection against  
49 181 autonomic dysfunction, motor and cognitive decline[31].

1  
2  
3 182 IF and PF may have potent immunomodulatory effects which are partially mediated by the  
4 183 gut microbiome and the fasting induced alterations of the latter[32]. These microbial shifts  
5 184 include upregulation of *Akkermansia muciniphila*, *Bacteroides fragilis*, other *Bacteroides* spp.,  
6 185 Proteobacteria, and butyric acid producing *Lachnospiraceae*, but also *Odoribacter*, which is  
7 186 negatively associated with blood pressure[33, 34]. Interestingly, an overall decrease of the  
8 187 Firmicutes/Bacteroidetes ratio could be observed, a high ratio is commonly associated with  
9 188 several pathologies, including RA [35].  
10  
11 189

12  
13 190 To our knowledge no clinical trials have been investigating the connection between IF or PF  
14 191 and PD in humans so far[31]. Our study aims to elucidate the causal relationship between the  
15 192 gut microbiome and the immune system. To do so, we will use analyses of the molecular basis  
16 193 of human-microbiome interactions enabled by high throughput methodologies such as the  
17 194 combination of metagenomics, metatranscriptomics and metaproteomics. Moreover, we are  
18 195 aiming at identifying new genes, proteins, metabolites and host pathways facilitating the  
19 196 development of novel diagnostic and therapeutic tools[36, 37].  
20  
21 197

## 22 23 24 198 **Methods and Analysis (2256)**

25  
26 199

### 27 28 200 **Study objectives**

29 201 The first objective of the study is to define specific gut microbiome-derived molecules in RA  
30 202 and PD, compared to healthy individuals, and relate this information to the  
31 203 immunophenotypes of the individuals. The second objective is to identify and track common  
32 204 and disease-specific molecular signatures to predict the outcome of a gut microbiome-  
33 205 targeted therapeutic intervention, here fasting, on inflammation-driven symptoms in RA and  
34 206 PD. The third objective of the study is to identify and validate microbiome-derived effector  
35 207 molecules which downregulate pro-inflammatory innate and adaptive immune pathways.  
36  
37 208

### 38 39 40 209 **Study design**

41 210 The ExpoBiome cohort consists of 180 adult individuals, meeting the exclusion and inclusion  
42 211 criteria (Table 1), for the cross-sectional study (objectives 1 and 3) and 60 adult individuals for  
43 212 the longitudinal study (objectives 2 and 3). There are five different arms in total: (1) RA –  
44 213 cross-sectional arm [60 patients], (2) PD – cross-sectional arm [60 patients], and (3) healthy  
45 214 controls – cross-sectional arm [60 patients], (4) RA – longitudinal arm [30 patients], (5) PD –  
46 215 longitudinal arm [30 patients] (**Error! Reference source not found.**).  
47  
48 216

49 217 At the first visit (T0), patients answer several questionnaires, and blood, urine, saliva and  
50 218 stool samples are obtained (Table 2).

51 219 The longitudinal arms (1) and (2) undergo a 5–7-day PF with a dietary energy supply of max.  
52 220 350-400 kcal per day with vegetable or grain broths as well as fresh vegetable juices[28, 33].  
53 221 After the PF, the longitudinal arms follow a dietary regimen including the concept of TRE for  
54 222 a period of 12 months following the 16:8 pattern[38]. This means that food intake is allowed  
55 223 ad libitum for 8 h, followed by 16 h of fasting where no food should be consumed. The intake  
56 224 of non-caloric beverages, e.g. water, unsweetened tea or coffee is, however, allowed. The  
57  
58  
59  
60



225 participants attend one follow-up visit (T2) during the PF and 9 follow-up visits during the 12  
 226 months of TRE (**Error! Reference source not found.**).

## 228 Patient and Public Involvement

229 Feedback of patients during former clinical trials at the study centre in Berlin was integrated  
 230 in the planning and design of the fasting intervention of this study. Patients are not involved  
 231 in the conduct, reporting, or dissemination plans of this research.

## 233 Recruitment and randomisation

234 Patients are recruited by the specialised sites via different sources, e.g. by direct referral from  
 235 either a physician at the Immanuel Hospital Berlin and the outpatient department of the  
 236 Institute of Social Medicine, Epidemiology and Health Economics at Charité-  
 237 Universitätsmedizin Berlin, or the Paracelsus-Elena Clinic in Kassel, or by non-personal  
 238 advertising strategies (e.g. flyers or social media).

239 Participants meeting all the inclusion and no exclusion criteria (Table 1) are assigned to their  
 240 respective groups (RA, PD or healthy control) (**Error! Reference source not found.**) for the  
 241 cross-sectional study after written informed consent. Half of the patients from the RA group  
 242 and half of the patients from the PD group is selected to take part in the longitudinal part of  
 243 the study, including the fasting intervention according to their availability for all 11 visits and  
 244 their willingness to follow TRE over 12 months. This study is an open-label trial, as blinding is  
 245 not feasible in fasting interventions.

246  
 247

Table 1: Inclusion and exclusion criteria

| Inclusion criteria                                                                                                                                                                                                                                                                                                                                                                                                                                                                                                                                                                                                                                                                                                          | Exclusion criteria                                                                                                                                                                                                                                                                                                                                                                                                                                                                                                                                                                                                                                                                                                                                                              |
|-----------------------------------------------------------------------------------------------------------------------------------------------------------------------------------------------------------------------------------------------------------------------------------------------------------------------------------------------------------------------------------------------------------------------------------------------------------------------------------------------------------------------------------------------------------------------------------------------------------------------------------------------------------------------------------------------------------------------------|---------------------------------------------------------------------------------------------------------------------------------------------------------------------------------------------------------------------------------------------------------------------------------------------------------------------------------------------------------------------------------------------------------------------------------------------------------------------------------------------------------------------------------------------------------------------------------------------------------------------------------------------------------------------------------------------------------------------------------------------------------------------------------|
| <ul style="list-style-type: none"> <li>• age 18-79</li> <li>• one of the following diagnoses: rheumatoid arthritis (first diagnosis &gt;6 weeks ago), Parkinson's disease OR healthy volunteer</li> <li>• control ("healthy") individuals must be without any evidence of active known or treated RA, without any evidence of active, known or treated central nervous system disease, and without a known family history of idiopathic PD</li> <li>• control individuals should match the RA or PD individuals as closely as possible (sex, age, education)</li> <li>• present written declaration of consent</li> <li>• ability to understand the patient information and willingness to sign the consent form</li> </ul> | <ul style="list-style-type: none"> <li>• gout or proven bacterial arthritis</li> <li>• participation in another study</li> <li>• existing/current eating disorder (bulimia nervosa, anorexia nervosa) within the past 5 years</li> <li>• severe internal disease (e.g. kidney deficiency with creatinine &gt; 2mg/dl)</li> <li>• existing vegan diet or fasting during the last six months</li> <li>• presence or suspicion of atypical PD (e.g. early dementia, early autonomous dysfunction)</li> <li>• diagnosis of chronic inflammatory bowel diseases, celiac disease or colorectal cancer according to the guidelines of the German Society of Gastroenterology</li> <li>• use of anti-psychotic drugs</li> <li>• antibiotic use during the previous 12 months</li> </ul> |

|                                                                                                     |                                                                                                                                                                                                                                                                                                                                                                                       |
|-----------------------------------------------------------------------------------------------------|---------------------------------------------------------------------------------------------------------------------------------------------------------------------------------------------------------------------------------------------------------------------------------------------------------------------------------------------------------------------------------------|
| <ul style="list-style-type: none"> <li>• consent to specimen collection and specimen use</li> </ul> | <ul style="list-style-type: none"> <li>• start of novel therapy with disease-modifying anti-rheumatic drugs</li> <li>• pregnancy or breastfeeding women</li> <li>• contraindication for additional blood draws (e.g. haemoglobin &lt;10)</li> <li>• BMI &lt; 18.5</li> <li>• Psychiatric illness that limits understanding of the examination protocol (unable to consent)</li> </ul> |
|-----------------------------------------------------------------------------------------------------|---------------------------------------------------------------------------------------------------------------------------------------------------------------------------------------------------------------------------------------------------------------------------------------------------------------------------------------------------------------------------------------|

248

249 **Fasting dietary counselling**

250 The fasting group is closely monitored by nutritionists trained in fasting therapy, backed up  
 251 by physicians experienced in fasting, from the Charité – Universitätsmedizin Berlin and the  
 252 Paracelsus-Elena Clinic to ensure a uniform implementation of the fasting guidelines and the  
 253 well-being of the study participants. The monitoring consists of several in person and virtual  
 254 meetings which held individually or in group settings. Five meetings including the visits T0 and  
 255 T2 during the fasting week as well as a group meeting after PF to ensure a well-managed start  
 256 to the TRE phase take place. Group sessions are standardised using a pre-set deck of slides to  
 257 be discussed during the group meetings with only minor disease-related differences between  
 258 the PD and RA groups. All longitudinal participants receive a study-specific script with  
 259 information on fasting procedures.

260

261 **Medication**

262 The medical treatments of the patients are monitored and documented with every clinical  
 263 visit. The fasting intervention might necessitate temporary adjustments of several  
 264 medications e.g. anti-diabetic and anti-hypertensive drugs [28].

265

266 **Data collection**

267 Sample and data collection is performed at the two clinical sites, Charité – Universitätsmedizin  
 268 Berlin and Paracelsus-Elena Clinic (Table 2).

269

270 *Table 2: Sampling procedures.*

**a) Biochemical samples and procedures**

|                                          |
|------------------------------------------|
| Blood (123 mL at T0, 23 mL at T2-T11)    |
| Stool collection (2 mL at T0 and T3-T11) |
| Saliva collection (3.5 mL at T0-T11)     |
| Midstream urine (50 mL at T0 -T11)       |

271

**b) Questionnaires**

|                  |
|------------------|
| Disease specific |
| PD:              |

- 
- Disease Activity Score (DAS-28) [39]
  - Parkinson's Disease Sleep Scale-2 (PDSS-2) [40]
  - Parkinson's Disease Questionnaire-39 (PDQ-39)[41]
  - Simplified Disease Index Score (SDAI) [42]
  - Funktionsfragebogen Hannover (FFbH-R) [43]
  - Movement Disorder Society Unified PD Rating Scale (MDS-UPDRS)[44]
  - Non-Motor Symptoms Questionnaire (NMSQ)[45]
  - Non-Motor Symptoms Scale (NMSS)[46]

RA:

- Disease Activity Score (DAS-28) [42]
- Non-Motor Symptoms Questionnaire (NMSQ) [45]
- Funktionsfragebogen Hannover (FFbH-R) [43]

#### Dietary behaviour and lifestyle

- Fasting experience, expectation, and intervention
- Lifestyle
- 24H-Food-recall
- Food Frequency Questionnaire (FFQ)

#### General health and well-being

- Health Assessment Questionnaire (HAQ)[47]
  - Bristol Stool Scale[48]
  - Quality of Life questionnaire (WHO-5)[49]
  - Hospital Anxiety and Depression Scale (HADS)[50]
  - Profile of Mood States[51]
- 

272

273

#### 274 Anthropometric data and questionnaires

275 The electronic data capture system REDCap[52], a secure web-based application, is used to  
 276 record all individual specific data. All data is stored on a secure server infrastructure at the  
 277 host institution in Luxembourg. Weight, height, body mass index (BMI), heart rate and blood  
 278 pressure in sitting and standing position as well as waist-hip-ratio is determined at every visit.

279 Dietary behaviour, sociodemographic measurements (age, sex, education level, employment  
 280 status, marital status), family history, current and previous illness and co-morbidities, and  
 281 current medications, as well as disease-specific data, questionnaires about the well-being of  
 282 the patients and data on the behavioural factors are collected at baseline, T6 (week 3), T9  
 283 (month 6) and T11 (month 12) (Table 2). Questionnaires (24h-Food Recall, Bristol Stool Scale)  
 284 are answered at all visits by the study participants. Data storage, analysis and exchange are  
 285 done only in pseudonymised fashion. The nutritional data is analysed using the Nutrilog 3.20  
 286 software (Nutrilog SAS, Marans).

### 288 Blood samples and parameters

289 Blood samples are collected at each visit, and immediately used for peripheral blood  
 290 mononuclear cell (PBMC) isolation (T0), analysis by the study laboratory and centrifugation  
 291 to freeze plasma samples at -80°C (T0-T11). A clinical standard laboratory report is generated  
 292 after every visit for each study participant (Table 3). In addition to the routine blood  
 293 parameters, anti-citrullinated protein antibody (ACPA), zonulin, fatty-acid binding protein 2  
 294 (FABP2), and calprotectin are measured. Aliquots are securely stored to account for novel  
 295 observations and testing of hypotheses.

296  
 297 *Table 3: Routine blood parameters measured at each timepoint (T0 for cross-sectional study, T0-T11 for longitudinal study)*

| Haematology - EDTA-blood | Clinical Chemistry - Serum |
|--------------------------|----------------------------|
| Basophils, %             | Albumin                    |
| Basophils, abs.          | ALT, 37°C                  |
| Eosinophils, %           | Alkaline Phosphatase, 37°C |
| Eosinophils, abs.        | AST, 37°C                  |
| Erythrocytes             | Bilirubin, total           |
| Haematocrit              | Cholinesterase             |
| Haemoglobin              | Cholesterol                |
| HbA1c                    | Creatinine                 |
| Leucocytes               | hs-CRP                     |
| Lymphocytes, %           | Glucose, serum             |
| Lymphocytes, abs.        | Gamma-GT, 37°C             |
| MCH                      | HDL-Cholesterol            |
| MCHC                     | LDL-Cholesterol            |
| MCV                      | Potassium                  |
| Monocytes, %             | Sodium                     |
| Monocytes, abs.          | Total Protein              |
| Neutrophils, %           | Triglycerides              |

|                     |                          |
|---------------------|--------------------------|
| Neutrophils, abs.   | Uric Acid                |
| Platelets           | Urea/BUN                 |
| RDW                 | <b>Proteins - Serum</b>  |
| Reticulocytes       | Rheumatoid factor H 35.9 |
| Reticulocytes       | <b>Hormones - Serum</b>  |
| Reticulocytes, abs. | Insulin                  |
|                     | TSH (basal)              |

298

## 299 Stool, urine and saliva samples

300 The samples listed in Table 2 are collected at each visit, except for stool samples on T2 (fasting  
 301 week) and immediately frozen and stored at -80°C. Stool characteristics are recorded at the  
 302 time of the sampling. Faecal samples represent the main sample type for resolving the  
 303 dynamic processes driven by microbiome in the gut. Also, as the gut microbiome is prone to  
 304 diurnal fluctuations, the stool samples are, as far as possible, collected in the morning.

305

## 306 Methods applied to samples

307

### 308 Biomolecular extractions

309 The collected stool samples undergo a biomolecular extraction procedure to allow isolation  
 310 of concomitant DNA, RNA, proteins, peptides and metabolites from single, unique faecal  
 311 water samples[53, 54]. Faecal water is recovered following centrifugation and filtration, at  
 312 low-speed or low-flow, respectively, to avoid cell lysis. Nucleic acids are preserved by the  
 313 addition of ribonuclease inhibitors and isolated by silica-column-based techniques. This  
 314 protocol involves the use of a robotic platform, ensuring a higher level of standardisation and  
 315 reproducibility[2].

316

### 317 Coupled metagenomic and metatranscriptomic analyses

318 Prior to sequencing library preparation, internal standards are introduced to obtain  
 319 quantitative sequencing data[55]. Contamination-free metagenomic (MG) and  
 320 metatranscriptomic (MT) data is generated, processed and analysed using the Integrated  
 321 Meta-omics Pipeline (IMP)[36], which incorporates pre-processing, assembly, gene  
 322 annotation, mapping of reads, single nucleotide polymorphism calling, data normalisation as  
 323 well as analyses of community structure and function in a fully reproducible software  
 324 framework based on Docker. The MG and MT data is specifically screened for enrichments in  
 325 genes and pathways with known immunogenic properties[56]. The extracellular biomolecules  
 326 are linked to specific microbial populations based on the intracellular metagenomic data [57].  
 327 In addition, the sequencing data is mapped against genomes of food components[58]. The  
 328 quantitative data is also related to microbial population sizes to determine the contribution  
 329 of the resolved microbial populations in stool to the extracellular DNA and RNA  
 330 complements[59].

331

### 332 Metaproteomics

333 For the metaproteomic analyses, filtration is used to separate extracellular peptides from the  
334 obtained (poly)peptides. The resulting smaller fractions are then desalted and analysed  
335 without proteolytic digestion via liquid chromatography (LC) and mass spectrometry (MS) on  
336 an EasyNano-LC coupled online to a QExactive-Plus mass spectrometer (ThermoScientific,  
337 USA). The identification of ribosomal peptides is done with an integrated catalogue of MG  
338 and MT data, while the non-ribosomal peptides are identified using different tools, i.e.,  
339 MyriMatch, DirecTag as well as CycloBranch[36, 60, 61]. The metaproteomic data also allows  
340 identification of extracellular (poly)peptides with possible pathogenic functions including  
341 protein misfolding and molecular mimicry[62, 63].

342

### 343 Metabolomics

344 Metabolomic data is analysed using a combination of targeted and untargeted approaches  
345 [54, 58, 64]. This highlights the major metabolite classes produced by the gut microbiome  
346 with an effect on human physiology including organic acids, short-chain fatty acids, lipids,  
347 branched-chain fatty acids, branched-chain amino acids, vitamins, bile acids and  
348 neurotransmitters. Besides external compound calibration series for quantification and  
349 quality control samples to ensure data normalisation and data acquisition quality assessment,  
350 the metabolite extraction fluid is fortified with multiple internal standards to improve method  
351 precision and accuracy[65, 66]. The data is compared to in-house databases and public mass  
352 spectral libraries to identify known metabolites. The metabolomic data complements the  
353 metagenomic and metatranscriptomic data and thus allows further establishments of  
354 conclusive links to metabolic properties in the gut.

355

### 356 Deep immune profiling

357 Deep immune profiling is done using a recently established and optimised panel of metal-  
358 labelled antibodies together with cytometry coupled to mass spectrometry (MS), the Maxpar  
359 Direct Immune Profiling System (MDIPA). This approach allows the simultaneous  
360 quantification of 38 parameters on single cells. Whole blood is stained with the MDIPA kit and  
361 stabilised with Proteomic stabiliser Prot-1 (501351694, Smart Tube Inc., Las Vegas) before  
362 storage at -80°C. The quantified immune cells included in the MDIPA panel are CD3+, CD4+,  
363 CD8+, monocytes, dendritic cells, granulocytes, MAIT, T cells, NK and B cells[67]. Cytokine  
364 expression profiles is analysed on blood plasma using the Human Luminex performance  
365 Cytokine Panel (R&D Systems Europe, Abingdon), measuring CCL3, CCL4, CCL5, GM-CSF, IL-  
366 1 $\beta$ , IL-2, IL-4, IL-5, IL-6, IL-8, IL-10, IL-12p70, IL-13, IL-15, IL-18, IL-21, IL-27, IL-33, IFN- $\beta$ ,  
367 Galectin-1, IFN- $\gamma$  and TNF- $\alpha$  [56].

368

### 369 Gut-on-a-chip models

370 PBMCs isolated from T0 blood samples are co-cultured with gut-derived microbes under  
371 physiologically representative conditions using the gut-on-a-chip model HuMiX[68]. This  
372 model of the human gastrointestinal interface allows the investigation of the interactions  
373 between immune, epithelial and bacterial cells and specifically the response to fasting in  
374 personalised in vitro models.

375

## 376 The Expobiome Map

377 The Expobiome Map (<https://expobiome.lcsb.uni.lu>) illustrates the diverse complex of  
378 microbial immunogenic molecules, including nucleic acids, (poly)peptides, structural  
379 molecules, and metabolites. The interactions between this “expobiome” and human immune  
380 pathways are encoded in the context of chronic diseases[1]. The ExpoBiome Map is visualised  
381 using the MINERVA Platform[69]. Clicking on different elements on the map reveals factors  
382 they affect and are affected by, allowing an easier navigation through the complex  
383 relationships between individual microbiome components in relation to human disease. The  
384 multi-omics data generated in the present study will be integrated with the Map.

385

## 386 Exploratory analysis of novel host-microbiome interactions

387 Unknown non-ribosomal peptides or metabolite features are associated through correlation  
388 with transcripts, proteins and metabolites. Extracellular DNA fragments, as well as transcripts,  
389 proteins and ribosomal peptides are linked to their genomic context by using IMP[36]. The  
390 data generated by the project will be connected and collated to existing, publicly available  
391 datasets.

392

## 393 Outcome parameters

### 394 Primary Outcome

395 The primary endpoint of the study is the characterisation of the gut microbiome. The  
396 evaluation includes both between-group and within-group differences in the longitudinal  
397 study arms with the fasting intervention.

398

### 399 Secondary Outcome Measures

400 Secondary outcomes include the identification of common and disease-specific molecular  
401 signatures and the characterisation of microbiome-derived effector molecules impacting the  
402 innate and adaptive immune pathways. Furthermore, several additional parameters  
403 mentioned in *Anthropometric data and questionnaires* are assessed over a period of 12  
404 months.

405

## 406 Sample size and power calculation

407 A power calculation using pilot metatranscriptomic data based on faecal extracellular RNA  
408 samples was performed to determine the number of subjects to be recruited for the  
409 ExpoBiome project. The obtained relative abundances of genera were used for the calculation  
410 of the required sample size per group. The power calculation was based on the algorithm as  
411 described by Tusher, Tibshirani, and Chu[70]. To achieve a power of 90% (at  $\alpha = 0.05$ ), a total  
412 of 50 individuals per group (RA, PD, healthy controls) must be analysed. Considering any  
413 possible dropouts, 20% additional subjects are recruited, resulting in a total number of 180  
414 individuals, i.e., 60 per group.

415

## 416 **Adverse events**

417 There are no major risks expected for participants. Minor common adverse effects of PF might  
418 include headaches, nausea, insomnia, back pain, dyspepsia and fatigue[71]. Any occurring  
419 adverse events are recorded at each visit in REDCap[52]. Serious adverse events are  
420 communicated to the study coordinator and principal investigator within 24 h of their report.  
421

## 422 **Data management, monitoring, analysis and evaluation of data**

423 The study participants receive a study ID (pseudonym) which is used for all collected data.  
424 Self-administered questionnaires are directly recorded in REDCap. Participant files are kept  
425 for at least 10 years at the respective clinical sites.

426 Weekly meetings between the study team, the different clinical partners and the principal  
427 investigator, ensure a close monitoring of the data. Any occurring adverse events or other  
428 issues are thus handled immediately.

429 Different statistical tests are performed according to the nature of the data. A premature  
430 termination of the study is not envisaged; therefore, no interim analysis is done. Different  
431 correlation measures are applied, including Spearman correlation, mutual information on  
432 discretised data, distance correlation, maximum information criterion, local similarity analysis  
433 and the bioenv approach. Comparison across all omic levels allows identification of common  
434 and disease-specific signatures. Multivariate machine learning is used to link different data  
435 features to observed patterns.

436 The longitudinal part of the study continues for a period of 12 months. After finalisation of  
437 this period, there is no follow-up of the participants. Interesting findings will be further  
438 validated using the existing sample set and analyses may be performed on additionally  
439 collected samples.

## 440 **Discussion (869)**

441 The impact and importance of the gut microbiome on human physiology and its potential  
442 modifications by nutrition and dietary patterns, have been underestimated for  
443 centuries[72].

444 More recently, physical as well as mental well-being has been related to the gut microbiome  
445 composition and new associations to human health are emerging almost every day. The gut  
446 microbiome is responsible for the fermentation of indigestible food components, the  
447 synthesis of numerous metabolites including vitamins, the removal of toxic compounds and  
448 pathogens, the maintenance and strengthening of the intestinal barrier and immune system  
449 function amongst others[21].

450 Globally we observe a gradual shift to a Western diet, typically low in micronutrients, mono-  
451 and polyunsaturated fats and linoleic acid but high in saturated fat, refined carbohydrates,  
452 salt and processed food. This shift is associated with an emergence of non-communicable  
453 diseases (NCDs) such as obesity, cardiovascular diseases, type 2 diabetes mellitus, cancer,  
454 liver and gastrointestinal diseases, bone and joint diseases, and degenerative diseases of the  
455 brain[73]. Not surprisingly, obesity and diabetes were some of the first diseases to be linked  
456 to the gut microbiome composition[74]. Psychological disorders like anxiety and depression  
457 have also been associated with the gut microbiome[75], emphasizing the importance of the  
458 bacterial community in various facets of health.  
459



1  
2  
3 460 Fasting has been used as an intervention to promote health or to heal diseases since the  
4 461 beginning of civilisations and has spread independently among different regions, cultures and  
5 462 religions worldwide[76]. It is believed to have already been established as a treatment  
6 463 method by Hippocrates in the 5<sup>th</sup> century BCE and has been used ever since by numerous  
7 464 medical schools to treat acute and chronic diseases[27, 77]. Various practices of caloric  
8 465 restriction through fasting have repeatedly shown remarkable health benefits[78, 79].  
9 466 Maifeld *et al.* for instance found that a 5-day fast followed by a modified Dietary Approach to  
10 467 Stop Hypertension (DASH), with additional emphasis on plant-based and Mediterranean  
11 468 diets, reduced systolic blood pressure, BMI, and the need for antihypertensive medications  
12 469 at three months post intervention compared to DASH alone. Bacterial taxa and genes  
13 470 associated with short-chain fatty acid production were altered in the gut, e.g. many Clostridial  
14 471 Firmicutes shifted significantly in abundance, with an initial decrease in butyrate producers  
15 472 such as *Faecalibacterium prausnitzii* [34].  
16  
17  
18  
19 473

20 474 Furthermore, Choi *et al.* demonstrated that cycles of a fasting-mimicking diet suppress  
21 475 autoimmunity and stimulate remyelination via oligodendrocyte regeneration in a murine  
22 476 experimental autoimmune encephalomyelitis (EAE) model[80]. Jordan *et al.* described a  
23 477 reduction in monocyte metabolic and inflammatory activity after a short-term fast and  
24 478 conclude that fasting attenuates chronic inflammatory diseases without compromising  
25 479 monocyte capacity for mobilisation during acute infectious inflammation and tissue  
26 480 repair[81].  
27  
28  
29 481

30 482 Diet as a tool to prevent disease, considering both the quantity and the quality of food,  
31 483 remains underappreciated in routine clinical practice as well as in research. Reasons may  
32 484 include missing standardised therapeutic protocols, the interindividual variability in the  
33 485 response to fasting, lack of knowledge about possible adverse effects, and difficulties in the  
34 486 interpretation of underlying mechanisms seen in clinical trials, but also in the comparably low  
35 487 potential for achieving economic revenue or scientific impact[8].  
36  
37 488

38  
39 489 Modern experimental approaches and computational integration allow a multi-layer analysis  
40 490 of digestive processes in low caloric settings including the gut microbiome[58]. These  
41 491 technological developments also permit a closer investigation of the link between the  
42 492 immune system and severe caloric restriction.  
43  
44 493

45 494 Fasting-induced changes in the gut microbiome are associated with host energy  
46 495 metabolism[33], with a shift in the gut microbiome after as little as 24h[72]. Although the  
47 496 changes in gut microbiome composition induced by a 10-day PF of healthy individuals return  
48 497 to baseline after 3 months, the resilience of the initial gut microbiome composition might not  
49 498 be the same in unhealthy individuals[33]. Currently available knowledge is insufficient to  
50 499 define a healthy gut microbiome due to high interindividual variability. However, several  
51 500 characteristics such as increased diversity in microbial taxa and their gene richness, a high  
52 501 amount of butyrate producers and resilience of the microbial community are often  
53 502 considered as beneficial[82]. Thus, a dysbiotic gut microbiome is likely to be less resilient and  
54 503 therefore more susceptible to dietary interventions, enabling a possible reversion to a healthy  
55 504 status[72].  
56  
57 505  
58  
59  
60

1  
2  
3 506 A potential mechanism underlying the observed beneficial effects induced by dietary  
4 507 interventions might be a direct gut microbiome-immune system interaction by pattern  
5 508 recognition. The microbiome can regulate the intestinal innate immune system by modulating  
6 509 toll-like receptor (TLR) expression on immunosensor cell surface through microbe-associated  
7 510 molecular patterns (MAMPs), which can consequently trigger cytokine production and up-  
8 511 regulation of molecules on antigen presenting cells, leading to activation of T cells[83].  
9 512 Therefore, a change in gut microbiome composition can lead to different outcomes in  
10 513 immune signaling pathways and either favor or suppress inflammation and autoimmunity.  
11  
12 514

13  
14 515 The current evidence highlights the immensely important connection between the  
15 516 environment and health, including dietary habits, microbiome and the immune system.  
16 517 Combining the newly generated data of this study with knowledge from disciplines such as  
17 518 nutrigenomics could potentially lead to more extended and deepened utilisation of  
18 519 personalised nutrition. Taking the gut microbiome into account as a key factor in disease for  
19 520 nutritional recommendations might revolutionise the current guidelines and allow  
20 521 substantially more efficient proposals. These approaches might eventually be broadly  
21 522 applicable and constitute an efficient antidote against the multiple burden of malnutrition  
22 523 and over-alimentation and the prominent NCDs.  
23  
24  
25  
26

## 27 524 **Trial status**

28 525 The recruitment for the ExpoBiome study started in April 2021 and is currently ongoing. All  
29 526 study participants should be recruited by the end of 2022.  
30  
31 527

## 32 33 528 **Acknowledgements**

34 529 We thank Dr. Catharina Delebinski, Melanie Dell'Oro, Grit Langhans, Ursula Reuß, Maik  
35 530 Schröder and Nadine Sylvester for their support during the study.  
36  
37 531

## 38 39 532 **Author contributions:**

- 40  
41 533 - Study design and protocol: Bérénice Hansen, Cédric C. Laczny, Jochen G. Schneider,  
42 534 Paul Wilmes  
43 535 - Interventional concept: Etienne Hanslian, Daniela Liebscher, Andreas Michalsen, Brit  
44 536 Mollenhauer, Sebastian Schade, Jochen G. Schneider, Paul Wilmes  
45 537 - Procured funding: Paul Wilmes  
46 538 - Statistical planning, sample size calculation and randomisation: Cédric C. Laczny,  
47 539 Jochen G. Schneider, Paul Wilmes  
48 540 - Initial draft of the manuscript and coordinated the editing process: Bérénice Hansen  
49 541 - Contributed equally with edits, comments and feedback, read and approved the final  
50 542 manuscript: all authors  
51  
52  
53

54 543

55  
56 544 **Funding statement:** This project has received funding from the European Research  
57 545 Council (ERC) under the European Union's Horizon 2020 research and innovation program  
58 546 (grant agreement No. 863664).  
59  
60

## 547 Competing interests statement

548 None declared.

## 549 Supplements

550 We used the SPIRIT checklist when writing our report[84].

## 551 References

- 552
- 553 1. Wilmes, P., et al., *The gut microbiome molecular complex in human health and disease*. Cell Host Microbe, 2022. **30**(9): p. 1201-1206.
- 554
- 555 2. De Saedeleer, B., et al., *Systematic characterization of human gut microbiome-secreted molecules by integrated multi-omics*. ISME Communications, 2021. **1**(1): p. 82.
- 556
- 557
- 558 3. Greenhalgh, K., et al., *The human gut microbiome in health: establishment and resilience of microbiota over a lifetime*. Environ Microbiol, 2016. **18**(7): p. 2103-16.
- 559
- 560 4. Hall, A.B., A.C. Tolonen, and R.J. Xavier, *Human genetic variation and the gut microbiome in disease*. Nature Reviews Genetics, 2017. **18**(11): p. 690-699.
- 561
- 562 5. Baldini, F., et al., *Parkinson's disease-associated alterations of the gut microbiome predict disease-relevant changes in metabolic functions*. BMC Biol, 2020. **18**(1): p. 62.
- 563
- 564 6. Yoo, J.Y., et al., *Gut Microbiota and Immune System Interactions*. Microorganisms, 2020. **8**(10).
- 565
- 566 7. Sonnenburg, J.L. and F. Bäckhed, *Diet-microbiota interactions as moderators of human metabolism*. Nature, 2016. **535**(7610): p. 56-64.
- 567
- 568 8. Zmora, N., J. Suez, and E. Elinav, *You are what you eat: diet, health and the gut microbiota*. Nat Rev Gastroenterol Hepatol, 2019. **16**(1): p. 35-56.
- 569
- 570 9. Guo, Q., et al., *Rheumatoid arthritis: pathological mechanisms and modern pharmacologic therapies*. Bone Res, 2018. **6**: p. 15.
- 571
- 572 10. Healthline, V.L. *Rheumatoid Arthritis by the Numbers: Facts, Statistics, and You*. 2021.
- 573
- 574 11. Scherer, H.U., T. Häupl, and G.R. Burmester, *The etiology of rheumatoid arthritis*. Journal of Autoimmunity, 2020. **110**: p. 102400.
- 575
- 576 12. Bodkhe, R., B. Balakrishnan, and V. Taneja, *The role of microbiome in rheumatoid arthritis treatment*. Ther Adv Musculoskelet Dis, 2019. **11**: p. 1759720x19844632.
- 577
- 578 13. Chen, J., et al., *An expansion of rare lineage intestinal microbes characterizes rheumatoid arthritis*. Genome Medicine, 2016. **8**(1): p. 43.
- 579
- 580 14. Wu, H.J., et al., *Gut-residing segmented filamentous bacteria drive autoimmune arthritis via T helper 17 cells*. Immunity, 2010. **32**(6): p. 815-27.
- 581
- 582 15. Scher, J.U., et al., *Expansion of intestinal Prevotella copri correlates with enhanced susceptibility to arthritis*. eLife, 2013. **2**: p. e01202.
- 583
- 584 16. Zhang, X., et al., *The oral and gut microbiomes are perturbed in rheumatoid arthritis and partly normalized after treatment*. Nature Medicine, 2015. **21**(8): p. 895-905.
- 585
- 586 17. Lubomski, M., et al., *Parkinson's disease and the gastrointestinal microbiome*. J Neurol, 2020. **267**(9): p. 2507-2523.
- 587
- 588 18. Opara, J., et al., *Motor assessment in Parkinson's disease*. Ann Agric Environ Med, 2017. **24**(3): p. 411-415.
- 589

- 1  
2  
3 590 19. Tysnes, O.B. and A. Storstein, *Epidemiology of Parkinson's disease*. J Neural Transm (Vienna), 2017. **124**(8): p. 901-905.
- 4 591
- 5 592 20. Garcia, P., et al., *Neurodegeneration and neuroinflammation are linked, but*
- 6 593 *independent of alpha-synuclein inclusions, in a seeding/spreading mouse model of*
- 7 594 *Parkinson's disease*. Glia, 2022. **70**(5): p. 935-960.
- 8 595 21. Heintz-Buschart, A. and P. Wilmes, *Human Gut Microbiome: Function Matters*.
- 9 596 Trends Microbiol, 2018. **26**(7): p. 563-574.
- 10 597 22. Romano, S., et al., *Meta-analysis of the Parkinson's disease gut microbiome suggests*
- 11 598 *alterations linked to intestinal inflammation*. npj Parkinson's Disease, 2021. **7**(1): p.
- 12 599 27.
- 13 600 23. Mertsalmi, T.H., et al., *More than constipation - bowel symptoms in Parkinson's*
- 14 601 *disease and their connection to gut microbiota*. European journal of neurology, 2017.
- 15 602 **24**(11): p. 1375-1383.
- 16 603 24. Dogra, N., R.J. Mani, and D.P. Katare, *The Gut-Brain Axis: Two Ways Signaling in*
- 17 604 *Parkinson's Disease*. Cell Mol Neurobiol, 2022. **42**(2): p. 315-332.
- 18 605 25. Forsyth, C.B., et al., *Increased intestinal permeability correlates with sigmoid mucosa*
- 19 606 *alpha-synuclein staining and endotoxin exposure markers in early Parkinson's*
- 20 607 *disease*. PLoS One, 2011. **6**(12): p. e28032.
- 21 608 26. Devos, D., et al., *Colonic inflammation in Parkinson's disease*. Neurobiol Dis, 2013.
- 22 609 **50**: p. 42-8.
- 23 610 27. Britannica, *The Editors of Encyclopaedia*. "fasting". Encyclopedia Britannica,,
- 24 611 Accessed 3 October 2022. <https://www.britannica.com/topic/fastening>.
- 25 612 28. Hartmann, A.M., et al., *Efficacy of therapeutic fasting and plant-based diet in*
- 26 613 *patients with rheumatoid arthritis (NutriFast): study protocol for a randomised*
- 27 614 *controlled clinical trial*. BMJ Open, 2021. **11**(8): p. e047758.
- 28 615 29. Hartmann, A.M., et al., *To eat or not to eat—an exploratory randomized controlled*
- 29 616 *trial on fasting and plant-based diet in rheumatoid arthritis (NutriFast-Study)*.
- 30 617 Frontiers in Nutrition, 2022. **9**.
- 31 618 30. Sköldstam, L., *Fasting and vegan diet in rheumatoid arthritis*. Scand J Rheumatol,
- 32 619 1986. **15**(2): p. 219-21.
- 33 620 31. Neth, B.J., et al., *The Role of Intermittent Fasting in Parkinson's Disease*. Front
- 34 621 Neurol, 2021. **12**: p. 682184.
- 35 622 32. Cignarella, F., et al., *Intermittent Fasting Confers Protection in CNS Autoimmunity by*
- 36 623 *Altering the Gut Microbiota*. Cell Metab, 2018. **27**(6): p. 1222-1235.e6.
- 37 624 33. Mesnage, R., et al., *Changes in human gut microbiota composition are linked to the*
- 38 625 *energy metabolic switch during 10 d of Buchinger fasting*. J Nutr Sci, 2019. **8**: p. e36.
- 39 626 34. Maifeld, A., et al., *Fasting alters the gut microbiome reducing blood pressure and*
- 40 627 *body weight in metabolic syndrome patients*. Nature Communications, 2021. **12**(1):
- 41 628 p. 1970.
- 42 629 35. Magne, F., et al., *The Firmicutes/Bacteroidetes Ratio: A Relevant Marker of Gut*
- 43 630 *Dysbiosis in Obese Patients?* Nutrients, 2020. **12**(5).
- 44 631 36. Narayanasamy, S., et al., *IMP: a pipeline for reproducible reference-independent*
- 45 632 *integrated metagenomic and metatranscriptomic analyses*. Genome Biology, 2016.
- 46 633 **17**(1): p. 260.
- 47 634 37. Wilmes, P., A. Heintz-Buschart, and P.L. Bond, *A decade of metaproteomics: where*
- 48 635 *we stand and what the future holds*. Proteomics, 2015. **15**(20): p. 3409-17.
- 50  
51  
52  
53  
54  
55  
56  
57  
58  
59  
60

- 1  
2  
3 636 38. Gabel, K., et al., *Effects of 8-hour time restricted feeding on body weight and*  
4 637 *metabolic disease risk factors in obese adults: A pilot study.* Nutr Healthy Aging,  
5 638 2018. **4**(4): p. 345-353.
- 6 639 39. Wells G, B.J., Teng J, et al, *Validation of the 28-joint Disease Activity Score (DAS28)*  
7 640 *and European League Against Rheumatism response criteria based on C-reactive*  
8 641 *protein against disease progression in patients with rheumatoid arthritis, and*  
9 642 *comparison with the DAS28 based on erythrocyte sedimentation rate.* Annals of the  
10 643 Rheumatic Diseases 2009. **68**: p. 954-960.
- 11 644 40. Trenkwalder, C., et al., *Parkinson's disease sleep scale--validation of the revised*  
12 645 *version PDSS-2.* Mov Disord, 2011. **26**(4): p. 644-52.
- 13 646 41. Bushnell, D.M. and M.L. Martin, *Quality of life and Parkinson's disease: translation*  
14 647 *and validation of the US Parkinson's Disease Questionnaire (PDQ-39).* Qual Life Res,  
15 648 1999. **8**(4): p. 345-50.
- 16 649 42. Smolen, J.S., et al., *A simplified disease activity index for rheumatoid arthritis for use*  
17 650 *in clinical practice.* Rheumatology (Oxford), 2003. **42**(2): p. 244-57.
- 18 651 43. Raspe, H.H., Hagedorn, U., Kohlmann, T., & Mattussek, S., *Der Funktionsfragebogen*  
19 652 *Hannover (FFbH): Ein Instrument zur Funktionsdiagnostik bei polyartikulären*  
20 653 *Gelenkerkrankungen, in Ergebnisse sozialwissenschaftlicher Evaluation eines*  
21 654 *Modellversuchs (pp. 164-182).* 1990, Schattauer Verlag.
- 22 655 44. Goetz, C.G., et al., *Movement Disorder Society-sponsored revision of the Unified*  
23 656 *Parkinson's Disease Rating Scale (MDS-UPDRS): Process, format, and clinimetric*  
24 657 *testing plan.* Mov Disord, 2007. **22**(1): p. 41-7.
- 25 658 45. Chaudhuri, K.R., et al., *International multicenter pilot study of the first*  
26 659 *comprehensive self-completed nonmotor symptoms questionnaire for Parkinson's*  
27 660 *disease: the NMSQuest study.* Mov Disord, 2006. **21**(7): p. 916-23.
- 28 661 46. Chaudhuri, K.R., et al., *The metric properties of a novel non-motor symptoms scale*  
29 662 *for Parkinson's disease: Results from an international pilot study.* Mov Disord, 2007.  
30 663 **22**(13): p. 1901-11.
- 31 664 47. Wolfe, F., *A brief clinical health assessment instrument clinhaq.* Arthritis and  
32 665 Rheumatism, 1989. **32**(4 Suppl): p. S99-S99.
- 33 666 48. Lewis, S.J. and K.W. Heaton, *Stool form scale as a useful guide to intestinal transit*  
34 667 *time.* Scand J Gastroenterol, 1997. **32**(9): p. 920-4.
- 35 668 49. Topp, C.W., et al., *The WHO-5 Well-Being Index: a systematic review of the literature.*  
36 669 Psychother Psychosom, 2015. **84**(3): p. 167-76.
- 37 670 50. Zigmond, A.S. and R.P. Snaith, *The hospital anxiety and depression scale.* Acta  
38 671 Psychiatr Scand, 1983. **67**(6): p. 361-70.
- 39 672 51. McNair DM, L.M., Droppleman LF, *Edits Manual for the Profile of Mood States*  
40 673 *(Poms). Rev ed. . San Diego: Educational and Industrial Testing Service, 1992.*
- 41 674 52. Harris, P.A., et al., *Research electronic data capture (REDCap)--a metadata-driven*  
42 675 *methodology and workflow process for providing translational research informatics*  
43 676 *support.* J Biomed Inform, 2009. **42**(2): p. 377-81.
- 44 677 53. Wilmes, P., Roume, H., Hiller, K. & Cordes, T., *Method and kit for the isolation of*  
45 678 *genomic DNA, RNA, proteins and metabolites from a single biological sample., in*  
46 679 *World Intellectual Property Organization, C.D.R.P.-G.L. Université Du Luxembourg,*  
47 680 *Editor. 2014: Switzerland.*
- 48 681 54. Roume, H., et al., *A biomolecular isolation framework for eco-systems biology.* The  
49 682 ISME Journal, 2013. **7**(1): p. 110-121.

- 1  
2  
3 683 55. Locati, M.D., et al., *Improving small RNA-seq by using a synthetic spike-in set for size-*  
4 684 *range quality control together with a set for data normalization.* Nucleic Acids Res,  
5 685 2015. **43**(14): p. e89.
- 6 686 56. Wampach, L., et al., *Birth mode is associated with earliest strain-conferred gut*  
7 687 *microbiome functions and immunostimulatory potential.* Nature Communications,  
8 688 2018. **9**(1): p. 5091.
- 9 689 57. Albanese, D. and C. Donati, *Strain profiling and epidemiology of bacterial species*  
10 690 *from metagenomic sequencing.* Nature Communications, 2017. **8**(1): p. 2260.
- 11 691 58. Heintz-Buschart, A., et al., *Integrated multi-omics of the human gut microbiome in a*  
12 692 *case study of familial type 1 diabetes.* Nature Microbiology, 2016. **2**(1): p. 16180.
- 13 693 59. Vandeputte, D., et al., *Quantitative microbiome profiling links gut community*  
14 694 *variation to microbial load.* Nature, 2017. **551**(7681): p. 507-511.
- 15 695 60. Tang, H., S. Li, and Y. Ye, *A Graph-Centric Approach for Metagenome-Guided Peptide*  
16 696 *and Protein Identification in Metaproteomics.* PLoS Comput Biol, 2016. **12**(12): p.  
17 697 e1005224.
- 18 698 61. Tabb, D.L., C.G. Fernando, and M.C. Chambers, *MyriMatch: highly accurate tandem*  
19 699 *mass spectral peptide identification by multivariate hypergeometric analysis.* J  
20 700 Proteome Res, 2007. **6**(2): p. 654-61.
- 21 701 62. Heintz-Buschart, A., et al., *The nasal and gut microbiome in Parkinson's disease and*  
22 702 *idiopathic rapid eye movement sleep behavior disorder.* Mov Disord, 2018. **33**(1): p.  
23 703 88-98.
- 24 704 63. Chen, S.G., et al., *Exposure to the Functional Bacterial Amyloid Protein Curli Enhances*  
25 705 *Alpha-Synuclein Aggregation in Aged Fischer 344 Rats and Caenorhabditis elegans.*  
26 706 Scientific Reports, 2016. **6**(1): p. 34477.
- 27 707 64. Wilmes, P., et al., *Metabolome-proteome differentiation coupled to microbial*  
28 708 *divergence.* mBio, 2010. **1**(5).
- 29 709 65. Kim, D.H., et al., *LC-MS-based absolute metabolite quantification: application to*  
30 710 *metabolic flux measurement in trypanosomes.* Metabolomics, 2015. **11**(6): p. 1721-  
31 711 1732.
- 32 712 66. Lei, Z., D.V. Huhman, and L.W. Sumner, *Mass spectrometry strategies in*  
33 713 *metabolomics.* J Biol Chem, 2011. **286**(29): p. 25435-42.
- 34 714 67. *Immunophenotyping assessment in a COVID-19 cohort (IMPACC): A prospective*  
35 715 *longitudinal study.* Sci Immunol, 2021. **6**(62).
- 36 716 68. Shah, P., et al., *A microfluidics-based in vitro model of the gastrointestinal human-*  
37 717 *microbe interface.* Nature Communications, 2016. **7**(1): p. 11535.
- 38 718 69. Aho, V.T.E., et al., *SnapShot: The Expobiome Map.* Cell Host Microbe, 2022. **30**(9): p.  
39 719 1340-1340.e1.
- 40 720 70. Tusher, V.G., R. Tibshirani, and G. Chu, *Significance analysis of microarrays applied to*  
41 721 *the ionizing radiation response.* Proc Natl Acad Sci U S A, 2001. **98**(9): p. 5116-21.
- 42 722 71. Finnell, J.S., et al., *Is fasting safe? A chart review of adverse events during medically*  
43 723 *supervised, water-only fasting.* BMC Complementary and Alternative Medicine,  
44 724 2018. **18**(1): p. 67.
- 45 725 72. Leeming, E.R., et al., *Effect of Diet on the Gut Microbiota: Rethinking Intervention*  
46 726 *Duration.* Nutrients, 2019. **11**(12): p. 2862.
- 47 727 73. Isaza, A., R. Singh, and S. Watanabe, *Functional Foods and Nutraceuticals in*  
48 728 *Metabolic and Non-communicable Diseases.* 2021.
- 59  
60

- 1  
2  
3 729 74. Duranti, S., et al., *Obesity and microbiota: an example of an intricate relationship*.  
4 730 Genes Nutr, 2017. **12**: p. 18.  
5 731 75. Simpson, C.A., et al., *The gut microbiota in anxiety and depression - A systematic*  
6 732 *review*. Clin Psychol Rev, 2021. **83**: p. 101943.  
7 733 76. Kerndt, P.R., et al., *Fasting: the history, pathophysiology and complications*. West J  
8 734 Med, 1982. **137**(5): p. 379-99.  
9 735 77. Michalsen, A., *Prolonged fasting as a method of mood enhancement in chronic pain*  
10 736 *syndromes: a review of clinical evidence and mechanisms*. Curr Pain Headache Rep,  
11 737 2010. **14**(2): p. 80-7.  
12 738 78. Vargas-Molina, S., et al., *Effects of a low-carbohydrate ketogenic diet on health*  
13 739 *parameters in resistance-trained women*. Eur J Appl Physiol, 2021. **121**(8): p. 2349-  
14 740 2359.  
15 741 79. Mattison, J.A., et al., *Caloric restriction improves health and survival of rhesus*  
16 742 *monkeys*. Nature Communications, 2017. **8**(1): p. 14063.  
17 743 80. Choi, I.Y., et al., *A Diet Mimicking Fasting Promotes Regeneration and Reduces*  
18 744 *Autoimmunity and Multiple Sclerosis Symptoms*. Cell Rep, 2016. **15**(10): p. 2136-  
19 745 2146.  
20 746 81. Jordan, S., et al., *Dietary Intake Regulates the Circulating Inflammatory Monocyte*  
21 747 *Pool*. Cell, 2019. **178**(5): p. 1102-1114.e17.  
22 748 82. Dogra, S.K., J. Doré, and S. Damak, *Gut Microbiota Resilience: Definition, Link to*  
23 749 *Health and Strategies for Intervention*. Front Microbiol, 2020. **11**: p. 572921.  
24 750 83. Purchiaroni, F., et al., *The role of intestinal microbiota and the immune system*. Eur  
25 751 Rev Med Pharmacol Sci, 2013. **17**(3): p. 323-33.  
26 752 84. Chan, A.-W., et al., *SPIRIT 2013 explanation and elaboration: guidance for protocols*  
27 753 *of clinical trials*. BMJ : British Medical Journal, 2013. **346**: p. e7586.  
28 754  
29  
30  
31  
32  
33  
34  
35

## 36 755 Figure Legends

37  
38  
39 756 Figure 1. Study design. This figure illustrates the study design with five different arms in  
40 757 total, two of which continue with the longitudinal part of the study. Visits take place at the  
41 758 clinical sites at each timepoint and include the collection of the displayed samples. This  
42 759 image was generated using Biorender software (<http://www.biorender.com>). T, timepoint;  
43 760 W, week; D, day; M, month.  
44  
45  
46  
47  
48  
49  
50  
51  
52  
53  
54  
55  
56  
57  
58  
59  
60

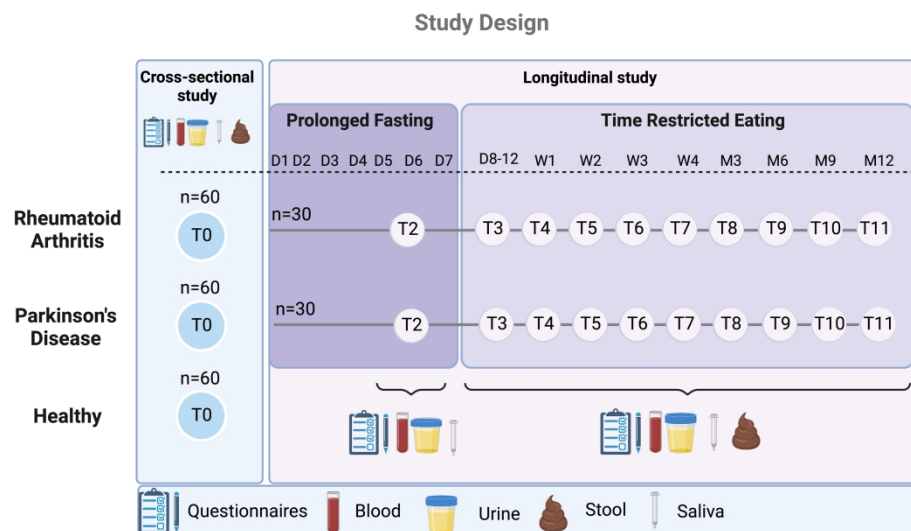

Figure 1. Study design. This figure illustrates the study design with five different arms in total, two of which continue with the longitudinal part of the study. Visits take place at the clinical sites at each timepoint and include the collection of the displayed samples. This image was generated using Biorender software (<http://www.biorender.com>). T, timepoint; W, week; D, day; M, month.

279x177mm (300 x 300 DPI)



# Reporting checklist for protocol of a clinical trial.

Based on the SPIRIT guidelines.

## Instructions to authors

Complete this checklist by entering the page numbers from your manuscript where readers will find each of the items listed below.

Your article may not currently address all the items on the checklist. Please modify your text to include the missing information. If you are certain that an item does not apply, please write "n/a" and provide a short explanation.

Upload your completed checklist as an extra file when you submit to a journal.

In your methods section, say that you used the SPIRIT reporting guidelines, and cite them as:

Chan A-W, Tetzlaff JM, Gøtzsche PC, Altman DG, Mann H, Berlin J, Dickersin K, Hróbjartsson A, Schulz KF, Parulekar WR, Krleža-Jerić K, Laupacis A, Moher D. SPIRIT 2013 Explanation and Elaboration: Guidance for protocols of clinical trials. *BMJ*. 2013;346:e7586

|                                             |                     | Reporting Item                                                                                               | Page Number |
|---------------------------------------------|---------------------|--------------------------------------------------------------------------------------------------------------|-------------|
| <b>Administrative information</b>           |                     |                                                                                                              |             |
| Title                                       | <a href="#">#1</a>  | Descriptive title identifying the study design, population, interventions, and, if applicable, trial acronym | 1           |
| Trial registration                          | <a href="#">#2a</a> | Trial identifier and registry name. If not yet registered, name of intended registry                         | 2           |
| Trial registration: data set                | <a href="#">#2b</a> | All items from the World Health Organization Trial Registration Data Set                                     | n/a         |
| Protocol version                            | <a href="#">#3</a>  | Date and version identifier                                                                                  | n/a         |
| Funding                                     | <a href="#">#4</a>  | Sources and types of financial, material, and other support                                                  | 14          |
| Roles and responsibilities: contributorship | <a href="#">#5a</a> | Names, affiliations, and roles of protocol contributors                                                      | 1           |

|    |                           |                     |                                                                    |       |
|----|---------------------------|---------------------|--------------------------------------------------------------------|-------|
| 1  | Roles and                 | <a href="#">#5b</a> | Name and contact information for the trial sponsor                 | 1     |
| 2  | responsibilities:         |                     |                                                                    |       |
| 3  | sponsor contact           |                     |                                                                    |       |
| 4  | information               |                     |                                                                    |       |
| 5  |                           |                     |                                                                    |       |
| 6  |                           |                     |                                                                    |       |
| 7  |                           |                     |                                                                    |       |
| 8  | Roles and                 | <a href="#">#5c</a> | Role of study sponsor and funders, if any, in study design;        | 1, 14 |
| 9  | responsibilities:         |                     | collection, management, analysis, and interpretation of data;      |       |
| 10 | sponsor and funder        |                     | writing of the report; and the decision to submit the report for   |       |
| 11 |                           |                     | publication, including whether they will have ultimate authority   |       |
| 12 |                           |                     | over any of these activities                                       |       |
| 13 |                           |                     |                                                                    |       |
| 14 |                           |                     |                                                                    |       |
| 15 |                           |                     |                                                                    |       |
| 16 | Roles and                 | <a href="#">#5d</a> | Composition, roles, and responsibilities of the coordinating       | 1, 14 |
| 17 | responsibilities:         |                     | centre, steering committee, endpoint adjudication committee,       |       |
| 18 | committees                |                     | data management team, and other individuals or groups              |       |
| 19 |                           |                     | overseeing the trial, if applicable (see Item 21a for data         |       |
| 20 |                           |                     | monitoring committee)                                              |       |
| 21 |                           |                     |                                                                    |       |
| 22 |                           |                     |                                                                    |       |
| 23 |                           |                     |                                                                    |       |
| 24 | <b>Introduction</b>       |                     |                                                                    |       |
| 25 |                           |                     |                                                                    |       |
| 26 |                           |                     |                                                                    |       |
| 27 | Background and            | <a href="#">#6a</a> | Description of research question and justification for undertaking | 3     |
| 28 | rationale                 |                     | the trial, including summary of relevant studies (published and    |       |
| 29 |                           |                     | unpublished) examining benefits and harms for each intervention    |       |
| 30 |                           |                     |                                                                    |       |
| 31 |                           |                     |                                                                    |       |
| 32 | Background and            | <a href="#">#6b</a> | Explanation for choice of comparators                              | 2     |
| 33 | rationale: choice of      |                     |                                                                    |       |
| 34 | comparators               |                     |                                                                    |       |
| 35 |                           |                     |                                                                    |       |
| 36 |                           |                     |                                                                    |       |
| 37 | Objectives                | <a href="#">#7</a>  | Specific objectives or hypotheses                                  | 5     |
| 38 |                           |                     |                                                                    |       |
| 39 |                           |                     |                                                                    |       |
| 40 | Trial design              | <a href="#">#8</a>  | Description of trial design including type of trial (eg, parallel  | 5     |
| 41 |                           |                     | group, crossover, factorial, single group), allocation ratio, and  |       |
| 42 |                           |                     | framework (eg, superiority, equivalence, non-inferiority,          |       |
| 43 |                           |                     | exploratory)                                                       |       |
| 44 |                           |                     |                                                                    |       |
| 45 |                           |                     |                                                                    |       |
| 46 | <b>Methods:</b>           |                     |                                                                    |       |
| 47 | <b>Participants,</b>      |                     |                                                                    |       |
| 48 | <b>interventions, and</b> |                     |                                                                    |       |
| 49 | <b>outcomes</b>           |                     |                                                                    |       |
| 50 |                           |                     |                                                                    |       |
| 51 |                           |                     |                                                                    |       |
| 52 |                           |                     |                                                                    |       |
| 53 | Study setting             | <a href="#">#9</a>  | Description of study settings (eg, community clinic, academic      | 6     |
| 54 |                           |                     | hospital) and list of countries where data will be collected.      |       |
| 55 |                           |                     | Reference to where list of study sites can be obtained             |       |
| 56 |                           |                     |                                                                    |       |
| 57 |                           |                     |                                                                    |       |
| 58 |                           |                     |                                                                    |       |
| 59 |                           |                     |                                                                    |       |
| 60 |                           |                     |                                                                    |       |

|    |                              |                      |                                                                                                                                                                                                                                                                                                                                                                                |     |
|----|------------------------------|----------------------|--------------------------------------------------------------------------------------------------------------------------------------------------------------------------------------------------------------------------------------------------------------------------------------------------------------------------------------------------------------------------------|-----|
| 1  | Eligibility criteria         | <a href="#">#10</a>  | Inclusion and exclusion criteria for participants. If applicable, eligibility criteria for study centres and individuals who will perform the interventions (eg, surgeons, psychotherapists)                                                                                                                                                                                   | 6   |
| 2  |                              |                      |                                                                                                                                                                                                                                                                                                                                                                                |     |
| 3  |                              |                      |                                                                                                                                                                                                                                                                                                                                                                                |     |
| 4  |                              |                      |                                                                                                                                                                                                                                                                                                                                                                                |     |
| 5  |                              |                      |                                                                                                                                                                                                                                                                                                                                                                                |     |
| 6  | Interventions:               | <a href="#">#11a</a> | Interventions for each group with sufficient detail to allow replication, including how and when they will be administered                                                                                                                                                                                                                                                     | 5   |
| 7  | description                  |                      |                                                                                                                                                                                                                                                                                                                                                                                |     |
| 8  |                              |                      |                                                                                                                                                                                                                                                                                                                                                                                |     |
| 9  |                              |                      |                                                                                                                                                                                                                                                                                                                                                                                |     |
| 10 | Interventions:               | <a href="#">#11b</a> | Criteria for discontinuing or modifying allocated interventions for a given trial participant (eg, drug dose change in response to harms, participant request, or improving / worsening disease)                                                                                                                                                                               | 5   |
| 11 | modifications                |                      |                                                                                                                                                                                                                                                                                                                                                                                |     |
| 12 |                              |                      |                                                                                                                                                                                                                                                                                                                                                                                |     |
| 13 |                              |                      |                                                                                                                                                                                                                                                                                                                                                                                |     |
| 14 |                              |                      |                                                                                                                                                                                                                                                                                                                                                                                |     |
| 15 | Interventions:               | <a href="#">#11c</a> | Strategies to improve adherence to intervention protocols, and any procedures for monitoring adherence (eg, drug tablet return; laboratory tests)                                                                                                                                                                                                                              | 7   |
| 16 | adherence                    |                      |                                                                                                                                                                                                                                                                                                                                                                                |     |
| 17 |                              |                      |                                                                                                                                                                                                                                                                                                                                                                                |     |
| 18 |                              |                      |                                                                                                                                                                                                                                                                                                                                                                                |     |
| 19 |                              |                      |                                                                                                                                                                                                                                                                                                                                                                                |     |
| 20 | Interventions:               | <a href="#">#11d</a> | Relevant concomitant care and interventions that are permitted or prohibited during the trial                                                                                                                                                                                                                                                                                  | 7   |
| 21 | concomitant care             |                      |                                                                                                                                                                                                                                                                                                                                                                                |     |
| 22 |                              |                      |                                                                                                                                                                                                                                                                                                                                                                                |     |
| 23 |                              |                      |                                                                                                                                                                                                                                                                                                                                                                                |     |
| 24 | Outcomes                     | <a href="#">#12</a>  | Primary, secondary, and other outcomes, including the specific measurement variable (eg, systolic blood pressure), analysis metric (eg, change from baseline, final value, time to event), method of aggregation (eg, median, proportion), and time point for each outcome. Explanation of the clinical relevance of chosen efficacy and harm outcomes is strongly recommended | 8   |
| 25 |                              |                      |                                                                                                                                                                                                                                                                                                                                                                                |     |
| 26 |                              |                      |                                                                                                                                                                                                                                                                                                                                                                                |     |
| 27 |                              |                      |                                                                                                                                                                                                                                                                                                                                                                                |     |
| 28 |                              |                      |                                                                                                                                                                                                                                                                                                                                                                                |     |
| 29 |                              |                      |                                                                                                                                                                                                                                                                                                                                                                                |     |
| 30 |                              |                      |                                                                                                                                                                                                                                                                                                                                                                                |     |
| 31 |                              |                      |                                                                                                                                                                                                                                                                                                                                                                                |     |
| 32 |                              |                      |                                                                                                                                                                                                                                                                                                                                                                                |     |
| 33 |                              |                      |                                                                                                                                                                                                                                                                                                                                                                                |     |
| 34 | Participant timeline         | <a href="#">#13</a>  | Time schedule of enrolment, interventions (including any run-ins and washouts), assessments, and visits for participants. A schematic diagram is highly recommended (see Figure)                                                                                                                                                                                               | 5   |
| 35 |                              |                      |                                                                                                                                                                                                                                                                                                                                                                                |     |
| 36 |                              |                      |                                                                                                                                                                                                                                                                                                                                                                                |     |
| 37 |                              |                      |                                                                                                                                                                                                                                                                                                                                                                                |     |
| 38 |                              |                      |                                                                                                                                                                                                                                                                                                                                                                                |     |
| 39 |                              |                      |                                                                                                                                                                                                                                                                                                                                                                                |     |
| 40 | Sample size                  | <a href="#">#14</a>  | Estimated number of participants needed to achieve study objectives and how it was determined, including clinical and statistical assumptions supporting any sample size calculations                                                                                                                                                                                          | 11  |
| 41 |                              |                      |                                                                                                                                                                                                                                                                                                                                                                                |     |
| 42 |                              |                      |                                                                                                                                                                                                                                                                                                                                                                                |     |
| 43 |                              |                      |                                                                                                                                                                                                                                                                                                                                                                                |     |
| 44 |                              |                      |                                                                                                                                                                                                                                                                                                                                                                                |     |
| 45 | Recruitment                  | <a href="#">#15</a>  | Strategies for achieving adequate participant enrolment to reach target sample size                                                                                                                                                                                                                                                                                            | 5   |
| 46 |                              |                      |                                                                                                                                                                                                                                                                                                                                                                                |     |
| 47 |                              |                      |                                                                                                                                                                                                                                                                                                                                                                                |     |
| 48 |                              |                      |                                                                                                                                                                                                                                                                                                                                                                                |     |
| 49 | <b>Methods: Assignment</b>   |                      |                                                                                                                                                                                                                                                                                                                                                                                |     |
| 50 | <b>of interventions (for</b> |                      |                                                                                                                                                                                                                                                                                                                                                                                |     |
| 51 | <b>controlled trials)</b>    |                      |                                                                                                                                                                                                                                                                                                                                                                                |     |
| 52 |                              |                      |                                                                                                                                                                                                                                                                                                                                                                                |     |
| 53 |                              |                      |                                                                                                                                                                                                                                                                                                                                                                                |     |
| 54 | Allocation: sequence         | <a href="#">#16a</a> | Method of generating the allocation sequence (eg, computer-generated random numbers), and list of any factors for stratification. To reduce predictability of a random sequence, details of any planned restriction (eg, blocking) should be                                                                                                                                   | n/a |
| 55 | generation                   |                      |                                                                                                                                                                                                                                                                                                                                                                                |     |
| 56 |                              |                      |                                                                                                                                                                                                                                                                                                                                                                                |     |
| 57 |                              |                      |                                                                                                                                                                                                                                                                                                                                                                                |     |
| 58 |                              |                      |                                                                                                                                                                                                                                                                                                                                                                                |     |
| 59 |                              |                      |                                                                                                                                                                                                                                                                                                                                                                                |     |
| 60 |                              |                      |                                                                                                                                                                                                                                                                                                                                                                                |     |

provided in a separate document that is unavailable to those who enrol participants or assign interventions

|                                                           |                      |                                                                                                                                                                                                                                                                                                                                                                                                              |     |
|-----------------------------------------------------------|----------------------|--------------------------------------------------------------------------------------------------------------------------------------------------------------------------------------------------------------------------------------------------------------------------------------------------------------------------------------------------------------------------------------------------------------|-----|
| Allocation concealment mechanism                          | <a href="#">#16b</a> | Mechanism of implementing the allocation sequence (eg, central telephone; sequentially numbered, opaque, sealed envelopes), describing any steps to conceal the sequence until interventions are assigned                                                                                                                                                                                                    | n/a |
| Allocation: implementation                                | <a href="#">#16c</a> | Who will generate the allocation sequence, who will enrol participants, and who will assign participants to interventions                                                                                                                                                                                                                                                                                    | n/a |
| Blinding (masking)                                        | <a href="#">#17a</a> | Who will be blinded after assignment to interventions (eg, trial participants, care providers, outcome assessors, data analysts), and how                                                                                                                                                                                                                                                                    | n/a |
| Blinding (masking): emergency unblinding                  | <a href="#">#17b</a> | If blinded, circumstances under which unblinding is permissible, and procedure for revealing a participant's allocated intervention during the trial                                                                                                                                                                                                                                                         | n/a |
| <b>Methods: Data collection, management, and analysis</b> |                      |                                                                                                                                                                                                                                                                                                                                                                                                              |     |
| Data collection plan                                      | <a href="#">#18a</a> | Plans for assessment and collection of outcome, baseline, and other trial data, including any related processes to promote data quality (eg, duplicate measurements, training of assessors) and a description of study instruments (eg, questionnaires, laboratory tests) along with their reliability and validity, if known. Reference to where data collection forms can be found, if not in the protocol | 8   |
| Data collection plan: retention                           | <a href="#">#18b</a> | Plans to promote participant retention and complete follow-up, including list of any outcome data to be collected for participants who discontinue or deviate from intervention protocols                                                                                                                                                                                                                    | 9   |
| Data management                                           | <a href="#">#19</a>  | Plans for data entry, coding, security, and storage, including any related processes to promote data quality (eg, double data entry; range checks for data values). Reference to where details of data management procedures can be found, if not in the protocol                                                                                                                                            | 12  |
| Statistics: outcomes                                      | <a href="#">#20a</a> | Statistical methods for analysing primary and secondary outcomes. Reference to where other details of the statistical analysis plan can be found, if not in the protocol                                                                                                                                                                                                                                     | 12  |

|    |                            |                      |                                                                    |     |
|----|----------------------------|----------------------|--------------------------------------------------------------------|-----|
| 1  | Statistics: additional     | <a href="#">#20b</a> | Methods for any additional analyses (eg, subgroup and adjusted     | 12  |
| 2  | analyses                   |                      | analyses)                                                          |     |
| 3  |                            |                      |                                                                    |     |
| 4  | Statistics: analysis       | <a href="#">#20c</a> | Definition of analysis population relating to protocol non-        | 12  |
| 5  | population and missing     |                      | adherence (eg, as randomised analysis), and any statistical        |     |
| 6  | data                       |                      | methods to handle missing data (eg, multiple imputation)           |     |
| 7  |                            |                      |                                                                    |     |
| 8  |                            |                      |                                                                    |     |
| 9  |                            |                      |                                                                    |     |
| 10 | <b>Methods: Monitoring</b> |                      |                                                                    |     |
| 11 |                            |                      |                                                                    |     |
| 12 | Data monitoring:           | <a href="#">#21a</a> | Composition of data monitoring committee (DMC); summary of         | 12  |
| 13 | formal committee           |                      | its role and reporting structure; statement of whether it is       |     |
| 14 |                            |                      | independent from the sponsor and competing interests; and          |     |
| 15 |                            |                      | reference to where further details about its charter can be found, |     |
| 16 |                            |                      | if not in the protocol. Alternatively, an explanation of why a     |     |
| 17 |                            |                      | DMC is not needed                                                  |     |
| 18 |                            |                      |                                                                    |     |
| 19 |                            |                      |                                                                    |     |
| 20 |                            |                      |                                                                    |     |
| 21 |                            |                      |                                                                    |     |
| 22 | Data monitoring:           | <a href="#">#21b</a> | Description of any interim analyses and stopping guidelines,       | n/a |
| 23 | interim analysis           |                      | including who will have access to these interim results and make   |     |
| 24 |                            |                      | the final decision to terminate the trial                          |     |
| 25 |                            |                      |                                                                    |     |
| 26 |                            |                      |                                                                    |     |
| 27 | Harms                      | <a href="#">#22</a>  | Plans for collecting, assessing, reporting, and managing solicited | 12  |
| 28 |                            |                      | and spontaneously reported adverse events and other unintended     |     |
| 29 |                            |                      | effects of trial interventions or trial conduct                    |     |
| 30 |                            |                      |                                                                    |     |
| 31 |                            |                      |                                                                    |     |
| 32 |                            |                      |                                                                    |     |
| 33 | Auditing                   | <a href="#">#23</a>  | Frequency and procedures for auditing trial conduct, if any, and   | n/a |
| 34 |                            |                      | whether the process will be independent from investigators and     |     |
| 35 |                            |                      | the sponsor                                                        |     |
| 36 |                            |                      |                                                                    |     |
| 37 |                            |                      |                                                                    |     |
| 38 | <b>Ethics and</b>          |                      |                                                                    |     |
| 39 | <b>dissemination</b>       |                      |                                                                    |     |
| 40 |                            |                      |                                                                    |     |
| 41 |                            |                      |                                                                    |     |
| 42 | Research ethics            | <a href="#">#24</a>  | Plans for seeking research ethics committee / institutional review | 2   |
| 43 | approval                   |                      | board (REC / IRB) approval                                         |     |
| 44 |                            |                      |                                                                    |     |
| 45 |                            |                      |                                                                    |     |
| 46 | Protocol amendments        | <a href="#">#25</a>  | Plans for communicating important protocol modifications (eg,      | 2   |
| 47 |                            |                      | changes to eligibility criteria, outcomes, analyses) to relevant   |     |
| 48 |                            |                      | parties (eg, investigators, REC / IRBs, trial participants, trial  |     |
| 49 |                            |                      | registries, journals, regulators)                                  |     |
| 50 |                            |                      |                                                                    |     |
| 51 |                            |                      |                                                                    |     |
| 52 |                            |                      |                                                                    |     |
| 53 | Consent or assent          | <a href="#">#26a</a> | Who will obtain informed consent or assent from potential trial    | 6   |
| 54 |                            |                      | participants or authorised surrogates, and how (see Item 32)       |     |
| 55 |                            |                      |                                                                    |     |
| 56 |                            |                      |                                                                    |     |
| 57 |                            |                      |                                                                    |     |
| 58 |                            |                      |                                                                    |     |
| 59 |                            |                      |                                                                    |     |
| 60 |                            |                      |                                                                    |     |

|    |                          |                      |                                                                      |     |
|----|--------------------------|----------------------|----------------------------------------------------------------------|-----|
| 1  | Consent or assent:       | <a href="#">#26b</a> | Additional consent provisions for collection and use of              | 6   |
| 2  | ancillary studies        |                      | participant data and biological specimens in ancillary studies, if   |     |
| 3  |                          |                      | applicable                                                           |     |
| 4  |                          |                      |                                                                      |     |
| 5  |                          |                      |                                                                      |     |
| 6  | Confidentiality          | <a href="#">#27</a>  | How personal information about potential and enrolled                | 12  |
| 7  |                          |                      | participants will be collected, shared, and maintained in order to   |     |
| 8  |                          |                      | protect confidentiality before, during, and after the trial          |     |
| 9  |                          |                      |                                                                      |     |
| 10 |                          |                      |                                                                      |     |
| 11 | Declaration of interests | <a href="#">#28</a>  | Financial and other competing interests for principal investigators  | 14  |
| 12 |                          |                      | for the overall trial and each study site                            |     |
| 13 |                          |                      |                                                                      |     |
| 14 |                          |                      |                                                                      |     |
| 15 | Data access              | <a href="#">#29</a>  | Statement of who will have access to the final trial dataset, and    | 12  |
| 16 |                          |                      | disclosure of contractual agreements that limit such access for      |     |
| 17 |                          |                      | investigators                                                        |     |
| 18 |                          |                      |                                                                      |     |
| 19 |                          |                      |                                                                      |     |
| 20 | Ancillary and post trial | <a href="#">#30</a>  | Provisions, if any, for ancillary and post-trial care, and for       | n/a |
| 21 | care                     |                      | compensation to those who suffer harm from trial participation       |     |
| 22 |                          |                      |                                                                      |     |
| 23 |                          |                      |                                                                      |     |
| 24 | Dissemination policy:    | <a href="#">#31a</a> | Plans for investigators and sponsor to communicate trial results     | 2   |
| 25 | trial results            |                      | to participants, healthcare professionals, the public, and other     |     |
| 26 |                          |                      | relevant groups (eg, via publication, reporting in results           |     |
| 27 |                          |                      | databases, or other data sharing arrangements), including any        |     |
| 28 |                          |                      | publication restrictions                                             |     |
| 29 |                          |                      |                                                                      |     |
| 30 |                          |                      |                                                                      |     |
| 31 |                          |                      |                                                                      |     |
| 32 |                          |                      |                                                                      |     |
| 33 | Dissemination policy:    | <a href="#">#31b</a> | Authorship eligibility guidelines and any intended use of            | 14  |
| 34 | authorship               |                      | professional writers                                                 |     |
| 35 |                          |                      |                                                                      |     |
| 36 |                          |                      |                                                                      |     |
| 37 | Dissemination policy:    | <a href="#">#31c</a> | Plans, if any, for granting public access to the full protocol,      | n/a |
| 38 | reproducible research    |                      | participant-level dataset, and statistical code                      |     |
| 39 |                          |                      |                                                                      |     |
| 40 |                          |                      |                                                                      |     |
| 41 | <b>Appendices</b>        |                      |                                                                      |     |
| 42 |                          |                      |                                                                      |     |
| 43 | Informed consent         | <a href="#">#32</a>  | Model consent form and other related documentation given to          | 6   |
| 44 | materials                |                      | participants and authorised surrogates                               |     |
| 45 |                          |                      |                                                                      |     |
| 46 |                          |                      |                                                                      |     |
| 47 | Biological specimens     | <a href="#">#33</a>  | Plans for collection, laboratory evaluation, and storage of          | 7   |
| 48 |                          |                      | biological specimens for genetic or molecular analysis in the        |     |
| 49 |                          |                      | current trial and for future use in ancillary studies, if applicable |     |
| 50 |                          |                      |                                                                      |     |
| 51 |                          |                      |                                                                      |     |

The SPIRIT Explanation and Elaboration paper is distributed under the terms of the Creative Commons Attribution License CC-BY-NC. This checklist was completed on 07. November 2022 using <https://www.goodreports.org/>, a tool made by the [EQUATOR Network](#) in collaboration with [Penelope.ai](#)

# BMJ Open

## Protocol for a multicentre cross-sectional, longitudinal clinical trial in rheumatoid arthritis and Parkinson's disease patients analysing the relation between the gut microbiome, fasting and immune status (ExpoBiome)

|                                 |                                                                                                                                                                                                                                                                                                                                                                                                                                                                                                                                                                                                                                                                                                                                                                                                                                                                                                                                                                                                                                                                                                                                                                                                                                                                                                                                                                                                                                                                                                                                                                                                                                                                                      |
|---------------------------------|--------------------------------------------------------------------------------------------------------------------------------------------------------------------------------------------------------------------------------------------------------------------------------------------------------------------------------------------------------------------------------------------------------------------------------------------------------------------------------------------------------------------------------------------------------------------------------------------------------------------------------------------------------------------------------------------------------------------------------------------------------------------------------------------------------------------------------------------------------------------------------------------------------------------------------------------------------------------------------------------------------------------------------------------------------------------------------------------------------------------------------------------------------------------------------------------------------------------------------------------------------------------------------------------------------------------------------------------------------------------------------------------------------------------------------------------------------------------------------------------------------------------------------------------------------------------------------------------------------------------------------------------------------------------------------------|
| Journal:                        | <i>BMJ Open</i>                                                                                                                                                                                                                                                                                                                                                                                                                                                                                                                                                                                                                                                                                                                                                                                                                                                                                                                                                                                                                                                                                                                                                                                                                                                                                                                                                                                                                                                                                                                                                                                                                                                                      |
| Manuscript ID                   | bmjopen-2022-071380.R1                                                                                                                                                                                                                                                                                                                                                                                                                                                                                                                                                                                                                                                                                                                                                                                                                                                                                                                                                                                                                                                                                                                                                                                                                                                                                                                                                                                                                                                                                                                                                                                                                                                               |
| Article Type:                   | Protocol                                                                                                                                                                                                                                                                                                                                                                                                                                                                                                                                                                                                                                                                                                                                                                                                                                                                                                                                                                                                                                                                                                                                                                                                                                                                                                                                                                                                                                                                                                                                                                                                                                                                             |
| Date Submitted by the Author:   | 31-May-2023                                                                                                                                                                                                                                                                                                                                                                                                                                                                                                                                                                                                                                                                                                                                                                                                                                                                                                                                                                                                                                                                                                                                                                                                                                                                                                                                                                                                                                                                                                                                                                                                                                                                          |
| Complete List of Authors:       | <p>Hansen, Bérénice; LCSB<br/> Laczny, Cédric C.; LCSB<br/> Aho, Velma T.E.; LCSB<br/> Frachet-Bour, Audrey; LCSB<br/> Habier, Janine; LCSB<br/> Ostaszewski, Marek; LCSB<br/> Michalsen, Andreas; Charité Universitätsmedizin Berlin, Institute for Social Medicine, Epidemiology and Health Economics; Immanuel Hospital Berlin-Wannsee Branch, Department of Internal and Integrative Medicine<br/> Hanslian, Etienne; Charite Universitätsmedizin Berlin, Institute for Social Medicine, Epidemiology and Health Economics; Immanuel Hospital Berlin-Wannsee Branch<br/> Koppold-Liebscher, Daniela; Charité Universitätsmedizin Berlin, Institute for Social Medicine, Epidemiology and Health Economics; Immanuel Hospital Berlin-Wannsee Branch<br/> Hartmann, Anika; Charité Universitätsmedizin Berlin, Institute of Social Medicine, Epidemiology and Health Economics; Charité Universitätsmedizin Berlin, Department of Dermatology, Venereology and Allergology<br/> Steckhan, Nico; Charité Universitätsmedizin Berlin, Institute for Social Medicine, Epidemiology and Health Economics; University of Potsdam, Digital Health - Connected Healthcare, Hasso Plattner Institute<br/> Mollenhauer, Brit; University Medical Center Göttingen; Paracelsus-Kliniken Deutschland GmbH<br/> Schade, Sebastian; University Medical Center Göttingen; Paracelsus-Kliniken Deutschland GmbH,<br/> Roomp, Kirsten; LCSB<br/> Schneider, Jochen; LCSB; Saarland University Hospital and Saarland University Faculty of Medicine, Department of Internal Medicine and Psychiatry<br/> Wilmes, Paul; LCSB; University of Luxembourg, Department of Life Sciences and Medicine</p> |
| <b>Primary Subject Heading</b>: | Nutrition and metabolism                                                                                                                                                                                                                                                                                                                                                                                                                                                                                                                                                                                                                                                                                                                                                                                                                                                                                                                                                                                                                                                                                                                                                                                                                                                                                                                                                                                                                                                                                                                                                                                                                                                             |
| Secondary Subject Heading:      | Immunology (including allergy), Rheumatology, Pharmacology and therapeutics, Neurology, Evidence based practice                                                                                                                                                                                                                                                                                                                                                                                                                                                                                                                                                                                                                                                                                                                                                                                                                                                                                                                                                                                                                                                                                                                                                                                                                                                                                                                                                                                                                                                                                                                                                                      |

1  
2  
3  
4  
5  
6  
7  
8  
9  
10  
11  
12  
13  
14  
15  
16  
17  
18  
19  
20  
21  
22  
23  
24  
25  
26  
27  
28  
29  
30  
31  
32  
33  
34  
35  
36  
37  
38  
39  
40  
41  
42  
43  
44  
45  
46  
47  
48  
49  
50  
51  
52  
53  
54  
55  
56  
57  
58  
59  
60

|           |                                                                                                                                                    |
|-----------|----------------------------------------------------------------------------------------------------------------------------------------------------|
| Keywords: | IMMUNOLOGY, Rheumatology < INTERNAL MEDICINE, MICROBIOLOGY, Parkinson-s disease < NEUROLOGY, NUTRITION & DIETETICS, Clinical trials < THERAPEUTICS |
|           |                                                                                                                                                    |

SCHOLARONE™  
Manuscripts



1  
2  
3  
4 1 **Protocol for a multicentre cross-sectional, longitudinal clinical trial in**  
5  
6 2 **rheumatoid arthritis and Parkinson's disease patients analysing the**  
7  
8 3 **relation between the gut microbiome, fasting and immune status**  
9  
10 **(ExpoBiome)**  
11  
12  
13

14 6 Bérénice Hansen<sup>1</sup>, Cédric C. Laczny<sup>1</sup>, Velma T.E. Aho<sup>1</sup>, Audrey Frachet-Bour<sup>1</sup>, Janine Habier<sup>1</sup>, Marek  
15 7 Ostaszewski<sup>1</sup>, Andreas Michalsen<sup>4,5</sup>, Etienne Hanslian<sup>4,5</sup>, Daniela A. Koppold<sup>4,5,8</sup>, Anika Hartmann<sup>4,10</sup>,  
16 8 Nico Steckhan<sup>4,9</sup>, Brit Mollenhauer<sup>6,7</sup>, Sebastian Schade<sup>6,7</sup>, Kirsten Roomp<sup>1</sup>, Jochen G. Schneider<sup>1,3+</sup>,  
17 9 Paul Wilmes<sup>1,2+</sup>

18 10  
19 11 <sup>1</sup>Luxembourg Centre for Systems Biomedicine, University of Luxembourg, Campus Belval, 7, avenue des Hauts-  
20 12 Fourneaux, L-4362 Esch-sur-Alzette, Luxembourg

21 13  
22 14 <sup>2</sup>Department of Life Sciences and Medicine, University of Luxembourg, 7, avenue des Hauts-Fourneaux, L-4362  
23 15 Esch-sur-Alzette, Luxembourg

24 16  
25 17 <sup>3</sup>Department of Internal Medicine and Psychiatry, Saarland University Medical Center, D- 66421 Homburg Saar,  
26 18 Germany

27 19  
28 20 <sup>4</sup>Institute for Social Medicine, Epidemiology and Health Economics, Charité – Universitätsmedizin Berlin,  
29 21 corporate member of Freie Universität Berlin, Humboldt-Universität zu Berlin, and Berlin Institute of Health

30 22  
31 23 <sup>5</sup>Department of Internal and Integrative Medicine, Immanuel Hospital Berlin, Germany

32 24  
33 25 <sup>6</sup>Paracelsus-Elena-Klinik, Kassel, Germany

34 26  
35 27 <sup>7</sup>University Medical Center Göttingen, Germany

36 28  
37 29 <sup>8</sup>Department of Pediatrics, Division of Oncology and Hematology, Charité – Universitätsmedizin Berlin,  
38 30 Corporate Member of Freie Universität Berlin, Humboldt-Universität zu Berlin and Berlin Institute of Health,  
39 31 Berlin, Germany

40 32  
41 33 <sup>9</sup>Digital Health - Connected Healthcare, Hasso Plattner Institute, University of Potsdam, Potsdam, Germany

42 34  
43 35 <sup>10</sup>Department of Dermatology, Venereology and Allergology, Charité—Universitätsmedizin Berlin, Corporate  
44 36 Member of Freie Universität Berlin and Humboldt-Universität zu Berlin, Berlin, Germany

45 37  
46 38 +contributed equally

47 39  
48 40 \*Correspondence to:

49 41  
50 42 Jochen Schneider (jochen.schneider@uni.lu)

51 43 Paul Wilmes (paul.wilmes@uni.lu)

52 44  
53 45 Luxembourg Centre for Systems Biomedicine,  
54 46 University of Luxembourg, Campus Belval,  
55 47 7, avenue des Hauts-Fourneaux,  
56 48 L-4362 Esch-sur-Alzette, Luxembourg

57 49  
58 50  
59 51 Word count: 3646  
60

## Abstract

### Introduction

Chronic inflammatory diseases like rheumatoid arthritis (RA) and neurodegenerative disorders like Parkinson's disease (PD) have recently been associated with a decreased diversity in the gut microbiome, emerging as key driver of various diseases. The specific interactions between gut-borne microorganisms and host pathophysiology remain largely unclear. The microbiome can be modulated by interventions comprising nutrition.

The aim of our clinical study is to (1) examine effects of prolonged fasting and time-restricted eating (TRE) on the outcome parameters and the immunophenotypes of RA and PD with (2) special consideration of microbial taxa and molecules associated with changes expected in (1) and (3) identify factors impacting the disease course and treatment by in depth screening of microorganisms and molecules in personalised HuMiX gut-on-chip models, to find novel targets for anti-inflammatory therapy.

### Methods and Analysis

This trial is an open-label, multicentre, controlled clinical trial consisting of a cross-sectional and a longitudinal study. A total of 180 patients is recruited. For the cross-sectional study, 60 patients with PD, 60 patients with RA and 60 healthy controls are recruited at two different, specialized clinical sites. For the longitudinal part, 30 patients with PD and 30 patients with RA undergo 5-7 days of prolonged fasting (PF) followed by TRE (16:8) for a period of 12 months. One baseline visit takes place before the PF intervention and 10 follow-up visits will follow over a period of 12 months (April 2021 to November 2023).

### Ethics and dissemination

Ethical approval was obtained to plan and conduct the trial from the institutional review board of the Charité-Universitätsmedizin Berlin (EA1/204/19), the ethics committee of the state medical association (Landesärztekammer) of Hessen (2021-2230-zvBO) and the Ethics Review Panel (ERP) of the University of Luxembourg (ERP 21-001-A ExpoBiome). The results of this study will be disseminated through peer-reviewed publications and scientific presentations.

### Trial registration number at [clinicaltrials.gov](https://clinicaltrials.gov):

NCT04847011

**Key words:** Microbiome, fasting therapy, intermittent fasting, time restricted eating, chronic disease, rheumatoid arthritis, Parkinson's disease, nutrition, chronic diseases, ExpoBiome, inflammation, gut on a chip, HuMiX, immunophenotype, metagenomics, metatranscriptomics, metaproteomics, metabolomics

### Strengths and limitations of the study

- The participants of the longitudinal study will be closely monitored for 12 months and routine blood parameters as well as anthropometric data and questionnaires will be precisely documented.

- 94 • This study will identify novel microbiome-derived common and disease-associated  
95 molecules involved in immune system modulation in two major chronic diseases: RA  
96 and PD.
- 97 • This study aims at also identifying novel targeted pathways to control chronic  
98 inflammatory conditions in the future.
- 99 • A limitation is the heterogeneity of the cohorts regarding age and sex, which is due to  
100 the prevalence of the diseases: RA is more common in women, while PD is more  
101 common in men and has a later disease onset.
- 102 • A bias exists in choosing RA and PD as chronic disorders to study immunophenotypes  
103 although generalisable results are targeted.  
104

## 105 Introduction (1339)

106  
107 The human microbiome is emerging as a key driver of various diseases through its complex of distinct  
108 yet connected biomolecules (referred to as the “*expobiome*”)[1, 2]. The expobiome comprises a  
109 diverse set of nucleic acids, polypeptides and metabolites which, in the gut alone, are present in  
110 substantial concentrations[1]. However, the specific interactions between gut-borne microorganisms  
111 and host (patho)physiology remain largely unknown. Although host genetics shape the composition  
112 of the gut microbiome, the latter is particularly influenced by non-genetic factors such as lifestyle and  
113 diet[3, 4]. Therefore, the microbiome is a plausible target to modify health outcomes.

114  
115 Individuals suffering from chronic diseases, including autoimmune, metabolic, and neurodegenerative  
116 diseases as well as cancer, often present alterations in their gut microbiome composition. These shifts  
117 are typically characterised by an overgrowth of one or several microbial species with likely adverse  
118 effects as well as a decrease in beneficial taxa[5]. Such imbalances are referred to as dysbiosis.  
119 Although structural microbiome changes are clearly detectable, the mechanistic or functional  
120 consequences of dysbiosis are still largely unknown. However, they may result in dysregulated  
121 interactions with the immune system[6]. Considering the intricacy of the immune system, the  
122 question arises whether the observed microbiome changes are cause or consequence of disease. This  
123 implies that, in addition to the genetic predisposition of the host, the gut microbiome needs to be  
124 considered a potential pathogenic factor or major driver of disease onset and course[3, 4].  
125

126 RA and PD are two specific examples representing dysregulated microbiome-immune system  
127 interactions [7, 8]. RA is a multifactorial, chronic and systemic autoimmune disease, primarily affecting  
128 the lining of the synovial joints with a higher risk and younger age for disease onset in women and a  
129 global prevalence of 1%[9, 10]. The exact disease pathogenesis is still unclear and no cure for RA  
130 currently exists. In addition to the common local articular symptoms of RA, systemic comorbidities can  
131 affect the vasculature, metabolism and bones[11]. Besides various environmental risk factors e.g.  
132 smoking and a Western diet, the host microbiome is associated with the pathophysiology of the  
133 disease[12]. The diversity of the gut microbiome has been reported to be decreased in individuals with  
134 RA, compared with the general population, and is correlated with disease duration, activity and  
135 autoantibody levels[13, 14]. Studies in murine models also report that autoimmune arthritis is strongly  
136 attenuated under germ-free conditions[15]. The introduction of specific bacteria, e.g. segmented  
137 filamentous bacteria, into germ-free animals or oral infection with *Porphyromonas gingivalis* drive  
138 autoimmune arthritis through activation of T helper cells[15]. Several different taxa, including  
139 *Prevotella copri*, *Lactobacillus* spp. and *Colinsella* spp. are enriched in the gut microbiome of patients  
140 with RA and correlate positively with disease markers e.g. immunoglobulins IgA and IgG , while other  
141 taxa like *Haemophilus* spp. and *Faecalibacterium* spp. are typically found at lower abundances in

1  
2  
3 142 patients with RA compared to healthy individuals[13, 16, 17]. Alterations of the gut microbiome may  
4 143 therefore have an important impact on RA pathophysiology[12].  
5 144

6 145 PD affects 0.4-2% of the population over 65 years worldwide and is the second most common  
7 146 progressive neurodegenerative disease with men being 1.5 times more likely to be affected than  
8 147 women[18]. Cardinal symptoms are motor deficiencies such as tremor and rigidity, but also include a  
9 148 wide range of non-motor symptoms, such as hyposmia, depression, insomnia or cognitive impairment,  
10 149 severely impacting patients' quality of life[19]. Aggregations of the protein  $\alpha$ -synuclein in the  
11 150 dopaminergic substantia nigra represent the main neuropathological manifestations[20]. PD-  
12 151 associated loss of dopaminergic neurons involves mechanisms of inflammatory and autoimmune  
13 152 responses with microglial activity as a major driver [21].Dysbiosis of the gut microbiome has been  
14 153 associated with the characteristic motor deficits and pathophysiological changes in the enteric and  
15 154 central nervous systems in animal studies. Increased relative abundances of the genera *Akkermansia*,  
16 155 *Bifidobacterium*, *Lactobacillus*, and *Methanobrevibacter* and decreased abundances in  
17 156 *Faecalibacterium* and *Roseburia* have been reported[22, 23]. Two recently published clinical-trials  
18 157 with prebiotic supplementation in PD observed a shift in gut microbiome composition, an increase in  
19 158 short-chain fatty acids (SCFA) and a reduction in non-motor-symptoms [24, 25]. Most patients with  
20 159 PD suffer from gastrointestinal symptoms such as constipation and irritable bowel syndrome (IBS) -  
21 160 like symptoms[26]. The gut-brain axis, e.g. by-products produced by the gut microbiome, may  
22 161 contribute to the production of  $\alpha$ -synuclein aggregates in the enteric nervous system[27]. In addition,  
23 162 increased intestinal permeability[28] as driver for enteric inflammation occur in PD and substantiate  
24 163 a role of peripheral inflammation in the initiation and the progression of the disease[29].  
25 164

26 165 One factor with known major impact on the gut microbiome and on chronic diseases is diet[7]. Dietary  
27 166 approaches as fasting have already been used by Hippocrates in the the 5<sup>th</sup> century BCE and have been  
28 167 applied ever since by numerous medical schools to treat acute and chronic diseases [30-32]. Various  
29 168 practices of caloric restriction through fasting have repeatedly shown remarkable health benefits[33,  
30 169 34]. Maifeld *et al.* found that a 5-day fast followed by a modified Dietary Approach to Stop  
31 170 Hypertension (DASH), with additional emphasis on plant-based and Mediterranean diets, reduced  
32 171 systolic blood pressure, BMI, and the need for antihypertensive medications at three months post  
33 172 intervention compared with DASH alone [35].  
34 173

35 174 Furthermore, Choi *et al.* demonstrated that cycles of a fasting-mimicking diet suppress autoimmunity  
36 175 and stimulate remyelination via oligodendrocyte regeneration in a murine experimental autoimmune  
37 176 encephalomyelitis (EAE) model[36]. Jordan *et al.* described a reduction in monocyte metabolic and  
38 177 inflammatory activity after a short-term fast and conclude that fasting attenuates chronic  
39 178 inflammatory diseases without compromising monocyte capacity for mobilisation during acute  
40 179 infectious inflammation and tissue repair[37].  
41 180

42 181 These improvements can, however, typically only be maintained for a limited period of time, and the  
43 182 symptoms can reappear after reintroduction of the patients' standard diet. Hence, protocols to sustain  
44 183 these beneficial effects are of utmost importance. In mouse models of PD, intermittent fasting (IF) has  
45 184 led to several improvements including decreased excitotoxicity, reduced neurodegeneration and  
46 185 protection against autonomic dysfunction, motor and cognitive decline[38].  
47 186

48 187 IF and PF may have potent immunomodulatory effects which may partially be mediated by the gut  
49 188 microbiome and the fasting induced alterations of the latter[39]. These microbial shifts include  
50 189 upregulation of *Akkermansia muciniphila*, *Bacteroides fragilis*, other *Bacteroides* spp., Proteobacteria,  
51 190 and butyric acid producing *Lachnospiraceae*, but also *Odoribacter*, which is negatively associated with  
52 191 blood pressure[35, 40]. Interestingly, an overall decrease of the Firmicutes/Bacteroidetes ratio could  
53 192 be observed, a high ratio is commonly associated with several pathologies, including RA [41].

193  
194 A potential mechanism underlying the observed beneficial effects induced by dietary interventions  
195 might be a direct gut microbiome-immune system interaction by pattern recognition. The microbiome  
196 can regulate the intestinal innate immune system by modulating toll-like receptor (TLR) expression on  
197 immunosensor cell surface through microbe-associated molecular patterns (MAMPs), which can  
198 consequently trigger cytokine production and up-regulation of molecules on antigen presenting cells,  
199 leading to activation of T cells[42]. Therefore, a change in gut microbiome composition can lead to  
200 different outcomes in immune signalling pathways and either favour or suppress inflammation and  
201 autoimmunity.

202  
203 The impact and importance of the gut microbiome on human physiology and its potential  
204 modifications by nutrition and dietary patterns, have been underestimated for centuries[43]. Reasons  
205 may include missing standardised therapeutic protocols, the interindividual variability in the response  
206 to fasting, lack of knowledge about possible adverse effects, and difficulties in the interpretation of  
207 underlying mechanisms seen in clinical trials, but also in the comparably low potential for achieving  
208 economic revenue or scientific impact[8].

209  
210 Modern experimental approaches and computational integration allow a multi-layer analysis of  
211 digestive processes in low caloric settings including the gut microbiome[44]. These technological  
212 developments also permit a closer investigation of the link between the immune system and severe  
213 caloric restriction.

214  
215 To our knowledge no clinical trials have been investigating the connection between IF or PF and PD in  
216 humans so far[38]. Our study aims to elucidate the causal relationship between the gut microbiome  
217 and the immune system. To do so, we will use analyses of the molecular basis of human-microbiome  
218 interactions enabled by high throughput methodologies such as the combination of metagenomics,  
219 metatranscriptomics and metaproteomics. Moreover, we are aiming at identifying new genes,  
220 proteins, metabolites, and host pathways facilitating the development of novel diagnostic and  
221 therapeutic tools[45, 46].

222

## 223 **Methods and Analysis (2317)**

224

### 225 **Study objectives**

226 The first objective of the study is to define specific gut microbiome-derived molecules in RA and PD,  
227 compared to healthy individuals, and relate this information to the immunophenotypes of the  
228 individuals. The second objective is to identify and track common and disease-specific molecular  
229 signatures to predict the outcome of a gut microbiome-targeted therapeutic intervention, here  
230 fasting, on inflammation-driven symptoms in RA and PD. The third objective of the study is to identify  
231 and validate microbiome-derived effector molecules which downregulate pro-inflammatory innate  
232 and adaptive immune pathways.

233

### 234 **Study design**

235 The ExpoBiome cohort consists of 180 adult individuals, meeting the exclusion and inclusion criteria  
236 (Table 1), for the cross-sectional study (objectives 1 and 3) and 60 adult individuals for the longitudinal  
237 study (objectives 2 and 3). There are five different arms in total: (1) RA – cross-sectional arm [60  
238 patients], (2) PD – cross-sectional arm [60 patients], and (3) healthy controls – cross-sectional arm [60  
239 patients], (4) RA – longitudinal arm [30 patients], (5) PD – longitudinal arm [30 patients] (Figure1).

240

At the first visit (T0), patients answer several questionnaires, and blood, urine, saliva and stool samples are obtained (Table 2). The longitudinal arms (4) and (5) undergo a 5–7-day PF with a dietary energy supply of max. 350-400 kcal per day with vegetable or grain broths as well as fresh vegetable juices[31, 40]. After the PF, the longitudinal arms follow a dietary regimen including the concept of TRE for a period of 12 months following the 16:8 pattern[47]. This means that food intake is allowed ad libitum for 8 h, followed by 16 h of fasting where no food should be consumed. The intake of non-caloric beverages, e.g. water, unsweetened tea or coffee is, however, allowed. The participants attend one follow-up visit (T2) during the PF and 9 follow-up visits during the 12 months of TRE (Figure 1).

## Patient and Public Involvement

Feedback of patients during former clinical trials at the study centre in Berlin was integrated in the planning and design of the fasting intervention of this study. Patients are not involved in the conduct, reporting, or dissemination plans of this research.

## Recruitment and randomisation

Patients are recruited by the specialised sites via different sources, e.g. by direct referral from either a physician at the Immanuel Hospital Berlin and the outpatient department of the Institute of Social Medicine, Epidemiology and Health Economics at Charité-Universitätsmedizin Berlin, or the Paracelsus-Elena Clinic in Kassel, or by non-personal advertising strategies (e.g. flyers or social media). Participants meeting all the inclusion and no exclusion criteria (Table 1) are assigned to their respective groups (RA, PD, or healthy control) (Figure 1) for the cross-sectional study after written informed consent. Half of the patients from the RA group and half of the patients from the PD group is selected to take part in the longitudinal part of the study, including the fasting intervention according to their availability for all 11 visits and their willingness to follow TRE over 12 months. This study is an open-label trial, as blinding is not feasible in fasting interventions.

Table 1: Inclusion and exclusion criteria

| Inclusion criteria                                                                                                                                                                                                                                                                                                                                                                                                                                                                                                                                                                                              | Exclusion criteria                                                                                                                                                                                                                                                                                                                                                                                                                                                                                                                                                                                                                                                                                      |
|-----------------------------------------------------------------------------------------------------------------------------------------------------------------------------------------------------------------------------------------------------------------------------------------------------------------------------------------------------------------------------------------------------------------------------------------------------------------------------------------------------------------------------------------------------------------------------------------------------------------|---------------------------------------------------------------------------------------------------------------------------------------------------------------------------------------------------------------------------------------------------------------------------------------------------------------------------------------------------------------------------------------------------------------------------------------------------------------------------------------------------------------------------------------------------------------------------------------------------------------------------------------------------------------------------------------------------------|
| <ul style="list-style-type: none"> <li>Age 18-79</li> <li>One of the following diagnoses: rheumatoid arthritis (first diagnosis &gt;6 weeks ago), Parkinson's disease OR healthy volunteer</li> <li>Control ("healthy") individuals must be without any evidence of active known or treated RA, without any evidence of active, known or treated central nervous system disease, and without a known family history of idiopathic PD</li> <li>Control individuals should match the RA or PD individuals as closely as possible (sex, age, education)</li> <li>Present written declaration of consent</li> </ul> | <ul style="list-style-type: none"> <li>Gout or proven bacterial arthritis</li> <li>Participation in another study</li> <li>Existing/current eating disorder (bulimia nervosa, anorexia nervosa) within the past 5 years</li> <li>Severe internal disease (e.g. kidney deficiency with creatinine &gt; 2mg/dl)</li> <li>Existing vegan diet or fasting during the last six months</li> <li>Presence or suspicion of atypical PD (e.g. early dementia, early autonomous dysfunction)</li> <li>Diagnosis of chronic inflammatory bowel diseases, celiac disease or colorectal cancer according to the guidelines of the German Society of Gastroenterology</li> <li>Use of anti-psychotic drugs</li> </ul> |

|                                                                                                                                                                                                       |                                                                                                                                                                                                                                                                                                                                                                                                                                               |
|-------------------------------------------------------------------------------------------------------------------------------------------------------------------------------------------------------|-----------------------------------------------------------------------------------------------------------------------------------------------------------------------------------------------------------------------------------------------------------------------------------------------------------------------------------------------------------------------------------------------------------------------------------------------|
| <ul style="list-style-type: none"> <li>• Ability to understand the patient information and willingness to sign the consent form</li> <li>• Consent to specimen collection and specimen use</li> </ul> | <ul style="list-style-type: none"> <li>• Antibiotic use during the previous 12 months</li> <li>• Start of novel therapy with disease-modifying anti-rheumatic drugs</li> <li>• Pregnancy or breastfeeding women</li> <li>• Contraindication for additional blood draws (e.g. haemoglobin &lt;10)</li> <li>• BMI &lt; 18.5</li> <li>• Psychiatric illness that limits understanding of the examination protocol (unable to consent)</li> </ul> |
|-------------------------------------------------------------------------------------------------------------------------------------------------------------------------------------------------------|-----------------------------------------------------------------------------------------------------------------------------------------------------------------------------------------------------------------------------------------------------------------------------------------------------------------------------------------------------------------------------------------------------------------------------------------------|

269

### 270 Fasting dietary counselling

271 The fasting group is closely monitored by nutritionists trained in fasting therapy, backed up by  
 272 physicians experienced in fasting, from the Charité – Universitätsmedizin Berlin and the Paracelsus-  
 273 Elena Clinic to ensure a uniform implementation of the fasting guidelines and the well-being of the  
 274 study participants. The monitoring consists of several in person and virtual meetings which held  
 275 individually or in group settings. Five meetings including the visits T0 and T2 during the fasting week  
 276 as well as a group meeting after PF to ensure a well-managed start to the TRE phase take place. Group  
 277 sessions are standardised using a pre-set deck of slides to be discussed during the group meetings  
 278 with only minor disease-related differences between the PD and RA groups. All longitudinal  
 279 participants receive a study-specific script with information on fasting procedures.

280

### 281 Medication

282 The medical treatments of the patients are monitored and documented with every clinical visit. The  
 283 fasting intervention might necessitate temporary adjustments of several medications e.g. anti-  
 284 diabetic and anti-hypertensive drugs as insulin levels and hypertension will be reduced due to lack of  
 285 food intake [31].

286

### 287 Data collection

288 Sample and data collection is performed at the two clinical sites, Charité – Universitätsmedizin Berlin  
 289 and Paracelsus-Elena Clinic (Table 2).

290

291 *Table 2: Sampling procedures.*

#### a) Biochemical samples and procedures

Blood (123 mL at T0, 23 mL at T2-T11)

Stool collection (2 mL at T0 and T3-T11)

Saliva collection (3.5 mL at T0-T11)

Midstream urine (50 mL at T0 -T11)

292

#### b) Questionnaires

Disease specific

60

---

PD:

- Disease Activity Score (DAS-28) [48]
- Parkinson's Disease Sleep Scale-2 (PDSS-2) [49]
- Parkinson's Disease Questionnaire-39 (PDQ-39)[50]
- Simplified Disease Index Score (SDAI) [51]
- Funktionsfragebogen Hannover (FFbH-R) [52]
- Movement Disorder Society Unified PD Rating Scale (MDS-UPDRS)[53]
- Non-Motor Symptoms Questionnaire (NMSQ)[54]
- Non-Motor Symptoms Scale (NMSS)[55]

RA:

- Disease Activity Score (DAS-28) [51]
- Non-Motor Symptoms Questionnaire (NMSQ) [54]
- Funktionsfragebogen Hannover (FFbH-R) [52]

Dietary behaviour and lifestyle

- Fasting experience, expectation, and intervention
- Lifestyle
- 24H-Food-recall
- Food Frequency Questionnaire (FFQ)

General health and well-being

- Health Assessment Questionnaire (HAQ)[56]
  - Bristol Stool Scale[57]
  - Quality of Life questionnaire (WHO-5)[58]
  - Hospital Anxiety and Depression Scale (HADS)[59]
-



---

- Profile of Mood States[60]

---

293

294

295 **Anthropometric data and questionnaires**

296 The electronic data capture system REDCap[61], a secure web-based application, is used to record all  
 297 individual specific data. All data is stored on a secure server infrastructure at the host institution in  
 298 Luxembourg. Weight, height, body mass index (BMI), heart rate and blood pressure in sitting and  
 299 standing position as well as waist-hip-ratio is determined at every visit. Dietary behaviour,  
 300 sociodemographic measurements (age, sex, education level, employment status, marital status),  
 301 family history, current and previous illness and co-morbidities, and current medications, as well as  
 302 disease-specific data, questionnaires about the well-being of the patients and data on the behavioural  
 303 factors are collected at baseline, T6 (week 3), T9 (month 6) and T11 (month 12) (Table 2).  
 304 Questionnaires (24h-Food Recall, Bristol Stool Scale) are answered at all visits by the study  
 305 participants. Data storage, analysis and exchange are done only in pseudonymised fashion. The  
 306 nutritional data is analysed using the Nutrilog 3.20 software (Nutrilog SAS, Marans).

307

308 **Blood samples and parameters**

309 Blood samples are collected at each visit, and immediately used for peripheral blood mononuclear cell  
 310 (PBMC) isolation (T0), analysis by the study laboratory and centrifugation to freeze plasma samples at  
 311 -80°C (T0-T11). A clinical standard laboratory report is generated after every visit for each study  
 312 participant (Table 3). In addition to routine blood parameters, anti-citrullinated protein antibody  
 313 (ACPA), zonulin, fatty-acid binding protein 2 (FABP2), and calprotectin levels are measured. Aliquots  
 314 are securely stored to account for novel observations and testing of hypotheses.

315

316 *Table 3: Routine blood parameters measured at each timepoint (T0 for cross-sectional study, T0-T11 for longitudinal study)*

| Haematology – EDTA-<br>blood | Clinical Chemistry –<br>Serum |
|------------------------------|-------------------------------|
| Basophils, %                 | Albumin                       |
| Basophils, abs.              | ALT, 37°C                     |
| Eosinophils, %               | Alkaline Phosphatase,<br>37°C |
| Eosinophils, abs.            | AST, 37°C                     |
| Erythrocytes                 | Bilirubin, total              |
| Haematocrit                  | Cholinesterase                |
| Haemoglobin                  | Cholesterol                   |
| HbA1c                        | Creatinine                    |
| Leucocytes                   | hs-CRP                        |
| Lymphocytes, %               | Glucose, serum                |
| Lymphocytes, abs.            | Gamma-GT, 37°C                |
| MCH                          | HDL-Cholesterol               |
| MCHC                         | LDL-Cholesterol               |

|                     |                          |
|---------------------|--------------------------|
| MCV                 | Potassium                |
| Monocytes, %        | Sodium                   |
| Monocytes, abs.     | Total Protein            |
| Neutrophils, %      | Triglycerides            |
| Neutrophils, abs.   | Uric Acid                |
| Platelets           | Urea/BUN                 |
| RDW                 | <b>Proteins – Serum</b>  |
| Reticulocytes       | Rheumatoid factor H 35.9 |
| Reticulocytes       | <b>Hormones – Serum</b>  |
| Reticulocytes, abs. | Insulin                  |
|                     | TSH (basal)              |

317

### 318 Stool, urine and saliva samples

319 The samples listed in Table 2 are collected at each visit, except for stool samples on T2 (fasting week)  
 320 and immediately frozen and stored at -80°C. Stool characteristics are recorded at the time of the  
 321 sampling. Faecal samples represent the main sample type for resolving the dynamic processes driven  
 322 by microbiome in the gut. Also, as the gut microbiome is prone to diurnal fluctuations, the stool  
 323 samples are collected in the morning, as far as possible.

324

### 325 Methods applied to samples

326

#### 327 Biomolecular extractions

328 The collected stool samples undergo a biomolecular extraction procedure to allow isolation of  
 329 concomitant DNA, RNA, proteins, peptides and metabolites from single, unique faecal water samples;  
 330 this process involves cryo-milling the samples in liquid nitrogen, disassociating metabolites from  
 331 membrane and cell wall components in a solvent mixture of methanol, chloroform and water and  
 332 lastly proteins and RNA extraction by a methanol/chloroform and phenol buffer [62, 63]. Faecal water  
 333 is recovered following centrifugation and filtration, at low-speed or low-flow, respectively, to avoid  
 334 cell lysis. Nucleic acids are preserved by the addition of ribonuclease inhibitors and isolated by silica-  
 335 column-based techniques. This protocol involves the use of a robotic platform, ensuring a higher level  
 336 of standardisation and reproducibility[2].

337

#### 338 Coupled metagenomic and metatranscriptomic analyses

339 Prior to sequencing library preparation, internal standards are introduced to obtain quantitative  
 340 sequencing data[64]. Contamination-free metagenomic (MG) and metatranscriptomic (MT) data is  
 341 generated, processed and analysed using the Integrated Meta-omics Pipeline (IMP)[45], which  
 342 incorporates pre-processing, assembly, gene annotation, mapping of reads, single nucleotide  
 343 polymorphism calling, data normalisation as well as analyses of community structure and function in  
 344 a fully reproducible software framework based on Docker. The MG and MT data is specifically  
 345 screened for enrichments in genes and pathways with known immunogenic properties[65]. The  
 346 extracellular biomolecules are linked to specific microbial populations based on the intracellular  
 347 metagenomic data [66]. In addition, the sequencing data is mapped against genomes of food  
 348 components[44]. The quantitative data is also related to microbial population sizes to determine the

1  
2  
3 349 contribution of the resolved microbial populations in stool to the extracellular DNA and RNA  
4 350 complements[67].  
5 351

### 7 352 **Metaproteomics**

8 353 For the metaproteomic analyses, filtration is used to separate extracellular peptides from the obtained  
9 354 (poly)peptides. The resulting smaller fractions are then desalted and analysed without proteolytic  
10 355 digestion via liquid chromatography (LC) and mass spectrometry (MS) on an EasyNano-LC coupled  
11 356 online to a QExactive-Plus mass spectrometer (ThermoScientific, Waltham, USA). The identification of  
12 357 ribosomal peptides is done with an integrated catalogue of MG and MT data, while the non-ribosomal  
13 358 peptides are identified using different tools, i.e., MyriMatch, DirecTag as well as CycloBranch[45, 68,  
14 359 69]. The metaproteomic data also allows identification of extracellular (poly)peptides with possible  
15 360 pathogenic functions including protein misfolding and molecular mimicry[70, 71].  
16 361

### 19 362 **Metabolomics**

20 363 Metabolomic data is analysed using a combination of targeted and untargeted approaches [44, 63,  
21 364 72]. This highlights the major metabolite classes produced by the gut microbiome with an effect on  
22 365 human physiology including organic acids, SCFA, lipids, branched-chain fatty acids, branched-chain  
23 366 amino acids, vitamins, bile acids and neurotransmitters. Besides external compound calibration series  
24 367 for quantification and quality control samples to ensure data normalisation and data acquisition  
25 368 quality assessment, the metabolite extraction fluid is fortified with multiple internal standards to  
26 369 improve method precision and accuracy[73, 74]. The data is compared to in-house databases and  
27 370 public mass spectral libraries to identify known metabolites. The metabolomic data complements the  
28 371 metagenomic and metatranscriptomic data and thus allows further establishments of conclusive links  
29 372 to metabolic properties in the gut.  
30 373

### 33 374 **Deep immune profiling**

34 375 Deep immune profiling is done using a recently established and optimised panel of metal-labelled  
35 376 antibodies together with cytometry coupled to mass spectrometry (MS), the Maxpar Direct Immune  
36 377 Profiling System (MDIPA). This approach allows the simultaneous quantification of 38 parameters on  
37 378 single cells. Whole blood is stained with the MDIPA kit and stabilised with Proteomic stabiliser Prot-1  
38 379 (501351694, Smart Tube Inc., Las Vegas) before storage at -80°C. The quantified immune cells  
39 380 included in the MDIPA panel are CD3+, CD4+, CD8+, monocytes, dendritic cells, granulocytes, MAIT, T  
40 381 cells, NK and B cells[75]. Cytokine expression profiles is analysed on blood plasma using the Human  
41 382 Luminex performance Cytokine Panel (R&D Systems Europe, Abingdon), measuring CCL3, CCL4, CCL5,  
42 383 GM-CSF, IL-1 $\beta$ , IL-2, IL-4, IL-5, IL-6, IL-8, IL-10, IL-12p70, IL-13, IL-15, IL-18, IL-21, IL-27, IL-33, IFN- $\beta$ ,  
43 384 Galectin-1, IFN- $\gamma$  and TNF- $\alpha$  [65].  
44 385

### 47 386 **Gut-on-a-chip models**

48 387 PBMCs isolated from T0 blood samples are co-cultured with gut-derived microbes under  
49 388 physiologically representative conditions using the gut-on-a-chip model HuMiX[76]. This model of the  
50 389 human gastrointestinal interface allows the investigation of the interactions between immune,  
51 390 epithelial and bacterial cells and specifically the response to fasting in personalised in vitro models.  
52 391

### 56 392 **The Expobiome Map**

57 393 The Expobiome Map (<https://expobiome.lcsb.uni.lu>) illustrates the diverse complex of microbial  
58 394 immunogenic molecules, including nucleic acids, (poly)peptides, structural molecules, and  
59 395 metabolites. The interactions between this “expobiome” and human immune pathways are encoded

396 in the context of chronic diseases[1]. The ExpoBiome Map is visualised using the MINERVA  
397 Platform[77]. Clicking on different elements on the map reveals factors they affect and are affected  
398 by, allowing an easier navigation through the complex relationships between individual microbiome  
399 components in relation to human disease. The multi-omics data generated in the present study will  
400 be integrated with the Map.

401

## 402 Exploratory analysis of novel host-microbiome interactions

403 Unknown non-ribosomal peptides or metabolite features are associated through correlation with  
404 transcripts, proteins and metabolites. Extracellular DNA fragments, as well as transcripts, proteins and  
405 ribosomal peptides are linked to their genomic context by using IMP[45]. The data generated by the  
406 project will be connected and collated to existing, publicly available datasets.

407

## 408 Outcome parameters

### 409 Primary Outcome

410 The primary endpoint of the study is the characterisation of the gut microbiome. The evaluation  
411 includes both between-group and within-group differences in the longitudinal study arms with the  
412 fasting intervention.

413

### 414 Secondary Outcome Measures

415 Secondary outcomes include the identification of common and disease-specific molecular signatures  
416 and the characterisation of microbiome-derived effector molecules impacting the innate and adaptive  
417 immune pathways. Furthermore, several additional parameters mentioned in *Anthropometric data*  
418 *and questionnaires* are assessed over a period of 12 months.

419

## 420 Sample size and power calculation

421 A power calculation using pilot metatranscriptomic data based on faecal extracellular RNA samples  
422 was performed to determine the number of subjects to be recruited for the ExpoBiome project. The  
423 obtained relative abundances of genera were used for the calculation of the required sample size per  
424 group. The power calculation was based on the algorithm as described by Tusher, Tibshirani, and  
425 Chu[78]. To achieve a power of 90% (at  $\alpha = 0.05$ ), a total of 50 individuals per group (RA, PD, healthy  
426 controls) must be analysed. Considering any possible dropouts, 20% additional subjects are recruited,  
427 resulting in a total number of 180 individuals, i.e., 60 per group.

428

## 429 Adverse events

430 There are no major risks expected for participants. Minor common adverse effects of PF might include  
431 headaches, nausea, insomnia, back pain, dyspepsia and fatigue[79]. Any occurring adverse events are  
432 recorded at each visit in REDCap[61]. Serious adverse events are communicated to the study  
433 coordinator and principal investigator within 24 h of their report.

434

## 435 Data management, monitoring, analysis and evaluation of data

436 The study participants receive a study ID (pseudonym) which is used for all collected data. Self-  
437 administered questionnaires are directly recorded in REDCap. Participant files are kept for at least 10  
438 years at the respective clinical sites.

439 Weekly meetings between the study team, the different clinical partners and the principal  
440 investigator, ensure a close monitoring of the data. Any occurring adverse events or other issues are  
441 thus handled immediately.

1  
2  
3 442 Different statistical tests are performed according to the nature of the data. A premature termination  
4 443 of the study is not envisaged; therefore, no interim analysis is done. Different correlation measures  
5 444 are applied, including Spearman correlation, mutual information on discretised data, distance  
6 445 correlation, maximum information criterion, local similarity analysis and the bioenv approach.  
7 446 Comparison across all omic levels allows identification of common and disease-specific signatures.  
8 447 Multivariate machine learning is used to link different data features to observed patterns.  
9 448 The longitudinal part of the study continues for a period of 12 months. After finalisation of this period,  
10 449 there is no follow-up of the participants. Interesting findings will be further validated using the existing  
11 450 sample set and analyses may be performed on additionally collected samples.  
12 451 The SPIRIT - checklist (Standard Protocol Items: Recommendations for Interventional Trials) was used  
13 452 to write this protocol [80].  
14  
15  
16

## 17 453 **Trial status**

18  
19 454 The recruitment for the ExpoBiome study started in April 2021 and is currently ongoing. All study  
20 455 participants should be recruited by the end of 2022. The sample collection will take place from April  
21 456 2021 to November 2023.  
22 457  
23  
24

## 25 458 **Acknowledgements**

26 459 We thank Dr. Catharina Delebinski, Melanie Dell'Oro, Grit Langhans, Ursula Reuß, Maik Schröder and  
27 460 Nadine Sylvester for their support during the study.  
28 461  
29  
30

## 31 462 **Author contributions:**

32 463 Study design and protocol were done by Bérénice Hansen, Cédric C. Laczny, Jochen G. Schneider,  
33 464 Paul Wilmes; the interventional concept was drawn by Etienne Hanslian, Daniela Liebscher, Andreas  
34 465 Michalsen, Anika Hartmann, Brit Mollenhauer, Sebastian Schade, Nico Steckhan, Jochen G.  
35 466 Schneider, Paul Wilmes; the clinical trial was designed and is conducted by Etienne Hanslian, Daniela  
36 467 Liebscher, Andreas Michalsen, Anika Hartmann, Brit Mollenhauer, Sebastian Schade; the procured  
37 468 funding was provided by Paul Wilmes; the planning of high-throughput applications, statistical  
38 469 planning, sample size calculation and randomisation were defined by Cédric C. Laczny, Jochen G.  
39 470 Schneider, Paul Wilmes, Kirsten Roomp; the initial draft of the manuscript and coordination of the  
40 471 editing process were performed by Bérénice Hansen; the protocol preparation has been done by  
41 472 Bérénice Hansen, Audrey Frachet-Bour, Janine Habier; the planning of the data analysis was done by  
42 473 Cédric C. Laczny, Jochen G. Schneider, Paul Wilmes, Kirsten Roomp, Velma T.E. Aho, Marek  
43 474 Ostaszewski; all authors contributed equally with edits, comments and feedback, read and approved  
44 475 the final manuscript.  
45 476  
46 477  
47  
48  
49

50 478 **Funding statement:** This project has received funding from the European Research  
51 479 Council (ERC) under the European Union's Horizon 2020 research and innovation program (grant  
52 480 agreement No. 863664).  
53  
54

## 55 481 **Competing interests statement**

56 482 None declared.  
57  
58  
59  
60

## Supplements

The SPIRIT checklist was used to write our report[80].

## References

1. Wilmes, P., et al., *The gut microbiome molecular complex in human health and disease*. Cell Host Microbe, 2022. **30**(9): p. 1201-1206.
2. De Saedeleer, B., et al., *Systematic characterization of human gut microbiome-secreted molecules by integrated multi-omics*. ISME Communications, 2021. **1**(1): p. 82.
3. Greenhalgh, K., et al., *The human gut microbiome in health: establishment and resilience of microbiota over a lifetime*. Environ Microbiol, 2016. **18**(7): p. 2103-16.
4. Hall, A.B., A.C. Tolonen, and R.J. Xavier, *Human genetic variation and the gut microbiome in disease*. Nature Reviews Genetics, 2017. **18**(11): p. 690-699.
5. Baldini, F., et al., *Parkinson's disease-associated alterations of the gut microbiome predict disease-relevant changes in metabolic functions*. BMC Biol, 2020. **18**(1): p. 62.
6. Yoo, J.Y., et al., *Gut Microbiota and Immune System Interactions*. Microorganisms, 2020. **8**(10).
7. Sonnenburg, J.L. and F. Bäckhed, *Diet–microbiota interactions as moderators of human metabolism*. Nature, 2016. **535**(7610): p. 56-64.
8. Zmora, N., J. Suez, and E. Elinav, *You are what you eat: diet, health and the gut microbiota*. Nat Rev Gastroenterol Hepatol, 2019. **16**(1): p. 35-56.
9. Guo, Q., et al., *Rheumatoid arthritis: pathological mechanisms and modern pharmacologic therapies*. Bone Res, 2018. **6**: p. 15.
10. Healthline, V.L. *Rheumatoid Arthritis by the Numbers: Facts, Statistics, and You*. 2021.
11. Scherer, H.U., T. Häupl, and G.R. Burmester, *The etiology of rheumatoid arthritis*. Journal of Autoimmunity, 2020. **110**: p. 102400.
12. Bodkhe, R., B. Balakrishnan, and V. Taneja, *The role of microbiome in rheumatoid arthritis treatment*. Ther Adv Musculoskelet Dis, 2019. **11**: p. 1759720x19844632.
13. Chen, J., et al., *An expansion of rare lineage intestinal microbes characterizes rheumatoid arthritis*. Genome Medicine, 2016. **8**(1): p. 43.
14. Kitamura, K., et al., *Oral and Intestinal Bacterial Substances Associated with Disease Activities in Patients with Rheumatoid Arthritis: A Cross-Sectional Clinical Study*. J Immunol Res, 2022. **2022**: p. 6839356.
15. Wu, H.J., et al., *Gut-residing segmented filamentous bacteria drive autoimmune arthritis via T helper 17 cells*. Immunity, 2010. **32**(6): p. 815-27.
16. Scher, J.U., et al., *Expansion of intestinal Prevotella copri correlates with enhanced susceptibility to arthritis*. eLife, 2013. **2**: p. e01202.
17. Zhang, X., et al., *The oral and gut microbiomes are perturbed in rheumatoid arthritis and partly normalized after treatment*. Nature Medicine, 2015. **21**(8): p. 895-905.
18. Lubomski, M., et al., *Parkinson's disease and the gastrointestinal microbiome*. J Neurol, 2020. **267**(9): p. 2507-2523.
19. Opara, J., et al., *Motor assessment in Parkinson`s disease*. Ann Agric Environ Med, 2017. **24**(3): p. 411-415.

- 1  
2  
3 527 20. Tysnes, O.B. and A. Storstein, *Epidemiology of Parkinson's disease*. J Neural Transm (Vienna), 2017. **124**(8): p. 901-905.
- 4 528  
5 529 21. Garcia, P., et al., *Neurodegeneration and neuroinflammation are linked, but*  
6 530 *independent of alpha-synuclein inclusions, in a seeding/spreading mouse model of*  
7 531 *Parkinson's disease*. Glia, 2022. **70**(5): p. 935-960.
- 8 532 22. Heintz-Buschart, A. and P. Wilmes, *Human Gut Microbiome: Function Matters*.  
9 533 Trends Microbiol, 2018. **26**(7): p. 563-574.
- 10 534 23. Romano, S., et al., *Meta-analysis of the Parkinson's disease gut microbiome suggests*  
11 535 *alterations linked to intestinal inflammation*. npj Parkinson's Disease, 2021. **7**(1): p.  
12 536 27.
- 13 537 24. Becker, A., et al., *Effects of Resistant Starch on Symptoms, Fecal Markers, and Gut*  
14 538 *Microbiota in Parkinson's Disease - The RESISTA-PD Trial*. Genomics Proteomics  
15 539 Bioinformatics, 2022. **20**(2): p. 274-287.
- 16 540 25. Hall, D.A., et al., *An open label, non-randomized study assessing a prebiotic fiber*  
17 541 *intervention in a small cohort of Parkinson's disease participants*. Nat Commun,  
18 542 2023. **14**(1): p. 926.
- 19 543 26. Mertsalmi, T.H., et al., *More than constipation - bowel symptoms in Parkinson's*  
20 544 *disease and their connection to gut microbiota*. European journal of neurology, 2017.  
21 545 **24**(11): p. 1375-1383.
- 22 546 27. Dogra, N., R.J. Mani, and D.P. Katare, *The Gut-Brain Axis: Two Ways Signaling in*  
23 547 *Parkinson's Disease*. Cell Mol Neurobiol, 2022. **42**(2): p. 315-332.
- 24 548 28. Forsyth, C.B., et al., *Increased intestinal permeability correlates with sigmoid mucosa*  
25 549 *alpha-synuclein staining and endotoxin exposure markers in early Parkinson's*  
26 550 *disease*. PLoS One, 2011. **6**(12): p. e28032.
- 27 551 29. Devos, D., et al., *Colonic inflammation in Parkinson's disease*. Neurobiol Dis, 2013.  
28 552 **50**: p. 42-8.
- 29 553 30. Britannica, *The Editors of Encyclopaedia. "fasting"*. Encyclopedia Britannica,,  
30 554 Accessed 3 October 2022. <https://www.britannica.com/topic/fastening>.
- 31 555 31. Hartmann, A.M., et al., *Efficacy of therapeutic fasting and plant-based diet in*  
32 556 *patients with rheumatoid arthritis (NutriFast): study protocol for a randomised*  
33 557 *controlled clinical trial*. BMJ Open, 2021. **11**(8): p. e047758.
- 34 558 32. Michalsen, A., *Prolonged fasting as a method of mood enhancement in chronic pain*  
35 559 *syndromes: a review of clinical evidence and mechanisms*. Curr Pain Headache Rep,  
36 560 2010. **14**(2): p. 80-7.
- 37 561 33. Vargas-Molina, S., et al., *Effects of a low-carbohydrate ketogenic diet on health*  
38 562 *parameters in resistance-trained women*. Eur J Appl Physiol, 2021. **121**(8): p. 2349-  
39 563 2359.
- 40 564 34. Mattison, J.A., et al., *Caloric restriction improves health and survival of rhesus*  
41 565 *monkeys*. Nature Communications, 2017. **8**(1): p. 14063.
- 42 566 35. Maifeld, A., et al., *Fasting alters the gut microbiome reducing blood pressure and*  
43 567 *body weight in metabolic syndrome patients*. Nature Communications, 2021. **12**(1):  
44 568 p. 1970.
- 45 569 36. Choi, I.Y., et al., *A Diet Mimicking Fasting Promotes Regeneration and Reduces*  
46 570 *Autoimmunity and Multiple Sclerosis Symptoms*. Cell Rep, 2016. **15**(10): p. 2136-  
47 571 2146.
- 48 572 37. Jordan, S., et al., *Dietary Intake Regulates the Circulating Inflammatory Monocyte*  
49 573 *Pool*. Cell, 2019. **178**(5): p. 1102-1114.e17.
- 50  
51  
52  
53  
54  
55  
56  
57  
58  
59  
60

- 1  
2  
3 574 38. Neth, B.J., et al., *The Role of Intermittent Fasting in Parkinson's Disease*. Front  
4 575 Neurol, 2021. **12**: p. 682184.
- 5 576 39. Cignarella, F., et al., *Intermittent Fasting Confers Protection in CNS Autoimmunity by*  
6 577 *Altering the Gut Microbiota*. Cell Metab, 2018. **27**(6): p. 1222-1235.e6.
- 7 578 40. Mesnage, R., et al., *Changes in human gut microbiota composition are linked to the*  
8 579 *energy metabolic switch during 10 d of Buchinger fasting*. J Nutr Sci, 2019. **8**: p. e36.
- 9 580 41. Magne, F., et al., *The Firmicutes/Bacteroidetes Ratio: A Relevant Marker of Gut*  
10 581 *Dysbiosis in Obese Patients?* Nutrients, 2020. **12**(5).
- 11 582 42. Purchiaroni, F., et al., *The role of intestinal microbiota and the immune system*. Eur  
12 583 Rev Med Pharmacol Sci, 2013. **17**(3): p. 323-33.
- 13 584 43. Leeming, E.R., et al., *Effect of Diet on the Gut Microbiota: Rethinking Intervention*  
14 585 *Duration*. Nutrients, 2019. **11**(12): p. 2862.
- 15 586 44. Heintz-Buschart, A., et al., *Integrated multi-omics of the human gut microbiome in a*  
16 587 *case study of familial type 1 diabetes*. Nature Microbiology, 2016. **2**(1): p. 16180.
- 17 588 45. Narayanasamy, S., et al., *IMP: a pipeline for reproducible reference-independent*  
18 589 *integrated metagenomic and metatranscriptomic analyses*. Genome Biology, 2016.  
19 590 **17**(1): p. 260.
- 20 591 46. Wilmes, P., A. Heintz-Buschart, and P.L. Bond, *A decade of metaproteomics: where*  
21 592 *we stand and what the future holds*. Proteomics, 2015. **15**(20): p. 3409-17.
- 22 593 47. Gabel, K., et al., *Effects of 8-hour time restricted feeding on body weight and*  
23 594 *metabolic disease risk factors in obese adults: A pilot study*. Nutr Healthy Aging,  
24 595 2018. **4**(4): p. 345-353.
- 25 596 48. Wells G, B.J., Teng J, et al, *Validation of the 28-joint Disease Activity Score (DAS28)*  
26 597 *and European League Against Rheumatism response criteria based on C-reactive*  
27 598 *protein against disease progression in patients with rheumatoid arthritis, and*  
28 599 *comparison with the DAS28 based on erythrocyte sedimentation rate*. Annals of the  
29 600 Rheumatic Diseases 2009. **68**: p. 954-960.
- 30 601 49. Trenkwalder, C., et al., *Parkinson's disease sleep scale--validation of the revised*  
31 602 *version PDSS-2*. Mov Disord, 2011. **26**(4): p. 644-52.
- 32 603 50. Bushnell, D.M. and M.L. Martin, *Quality of life and Parkinson's disease: translation*  
33 604 *and validation of the US Parkinson's Disease Questionnaire (PDQ-39)*. Qual Life Res,  
34 605 1999. **8**(4): p. 345-50.
- 35 606 51. Smolen, J.S., et al., *A simplified disease activity index for rheumatoid arthritis for use*  
36 607 *in clinical practice*. Rheumatology (Oxford), 2003. **42**(2): p. 244-57.
- 37 608 52. Raspe, H.H., Hagedorn, U., Kohlmann, T., & Mattussek, S., *Der Funktionsfragebogen*  
38 609 *Hannover (FFbH): Ein Instrument zur Funktionsdiagnostik bei polyartikulären*  
39 610 *Gelenkerkrankungen, in Ergebnisse sozialwissenschaftlicher Evaluation eines*  
40 611 *Modellversuchs (pp. 164-182)*. 1990, Schattauer Verlag.
- 41 612 53. Goetz, C.G., et al., *Movement Disorder Society-sponsored revision of the Unified*  
42 613 *Parkinson's Disease Rating Scale (MDS-UPDRS): Process, format, and clinimetric*  
43 614 *testing plan*. Mov Disord, 2007. **22**(1): p. 41-7.
- 44 615 54. Chaudhuri, K.R., et al., *International multicenter pilot study of the first*  
45 616 *comprehensive self-completed nonmotor symptoms questionnaire for Parkinson's*  
46 617 *disease: the NMSQuest study*. Mov Disord, 2006. **21**(7): p. 916-23.
- 47 618 55. Chaudhuri, K.R., et al., *The metric properties of a novel non-motor symptoms scale*  
48 619 *for Parkinson's disease: Results from an international pilot study*. Mov Disord, 2007.  
49 620 **22**(13): p. 1901-11.



- 1  
2  
3 621 56. Wolfe, F., *A brief clinical health assessment instrument clinhaq*. Arthritis and  
4 622 Rheumatism, 1989. **32**(4 Suppl): p. S99-S99.
- 5 623 57. Lewis, S.J. and K.W. Heaton, *Stool form scale as a useful guide to intestinal transit*  
6 624 *time*. Scand J Gastroenterol, 1997. **32**(9): p. 920-4.
- 7 625 58. Topp, C.W., et al., *The WHO-5 Well-Being Index: a systematic review of the literature*.  
8 626 Psychother Psychosom, 2015. **84**(3): p. 167-76.
- 9 627 59. Zigmond, A.S. and R.P. Snaith, *The hospital anxiety and depression scale*. Acta  
10 628 Psychiatr Scand, 1983. **67**(6): p. 361-70.
- 11 629 60. McNair DM, L.M., Droppleman LF, *Edits Manual for the Profile of Mood States*  
12 630 *(Poms)*. Rev ed. . San Diego: Educational and Industrial Testing Service, 1992.
- 13 631 61. Harris, P.A., et al., *Research electronic data capture (REDCap)--a metadata-driven*  
14 632 *methodology and workflow process for providing translational research informatics*  
15 633 *support*. J Biomed Inform, 2009. **42**(2): p. 377-81.
- 16 634 62. Wilmes, P., Roume, H., Hiller, K. & Cordes, T., *Method and kit for the isolation of*  
17 635 *genomic DNA, RNA, proteins and metabolites from a single biological sample.*, in  
18 636 *World Intellectual Property Organization, C.D.R.P.-G.L. Université Du Luxembourg,*  
19 637 *Editor. 2014: Switzerland.*
- 20 638 63. Roume, H., et al., *A biomolecular isolation framework for eco-systems biology*. The  
21 639 ISME Journal, 2013. **7**(1): p. 110-121.
- 22 640 64. Locati, M.D., et al., *Improving small RNA-seq by using a synthetic spike-in set for size-*  
23 641 *range quality control together with a set for data normalization*. Nucleic Acids Res,  
24 642 2015. **43**(14): p. e89.
- 25 643 65. Wampach, L., et al., *Birth mode is associated with earliest strain-conferred gut*  
26 644 *microbiome functions and immunostimulatory potential*. Nature Communications,  
27 645 2018. **9**(1): p. 5091.
- 28 646 66. Albanese, D. and C. Donati, *Strain profiling and epidemiology of bacterial species*  
29 647 *from metagenomic sequencing*. Nature Communications, 2017. **8**(1): p. 2260.
- 30 648 67. Vandeputte, D., et al., *Quantitative microbiome profiling links gut community*  
31 649 *variation to microbial load*. Nature, 2017. **551**(7681): p. 507-511.
- 32 650 68. Tang, H., S. Li, and Y. Ye, *A Graph-Centric Approach for Metagenome-Guided Peptide*  
33 651 *and Protein Identification in Metaproteomics*. PLoS Comput Biol, 2016. **12**(12): p.  
34 652 e1005224.
- 35 653 69. Tabb, D.L., C.G. Fernando, and M.C. Chambers, *MyriMatch: highly accurate tandem*  
36 654 *mass spectral peptide identification by multivariate hypergeometric analysis*. J  
37 655 Proteome Res, 2007. **6**(2): p. 654-61.
- 38 656 70. Heintz-Buschart, A., et al., *The nasal and gut microbiome in Parkinson's disease and*  
39 657 *idiopathic rapid eye movement sleep behavior disorder*. Mov Disord, 2018. **33**(1): p.  
40 658 88-98.
- 41 659 71. Chen, S.G., et al., *Exposure to the Functional Bacterial Amyloid Protein Curli Enhances*  
42 660 *Alpha-Synuclein Aggregation in Aged Fischer 344 Rats and Caenorhabditis elegans*.  
43 661 Scientific Reports, 2016. **6**(1): p. 34477.
- 44 662 72. Wilmes, P., et al., *Metabolome-proteome differentiation coupled to microbial*  
45 663 *divergence*. mBio, 2010. **1**(5).
- 46 664 73. Kim, D.H., et al., *LC-MS-based absolute metabolite quantification: application to*  
47 665 *metabolic flux measurement in trypanosomes*. Metabolomics, 2015. **11**(6): p. 1721-  
48 666 1732.
- 49  
50  
51  
52  
53  
54  
55  
56  
57  
58  
59  
60

- 1  
2  
3 667 74. Lei, Z., D.V. Huhman, and L.W. Sumner, *Mass spectrometry strategies in*  
4 668 *metabolomics*. J Biol Chem, 2011. **286**(29): p. 25435-42.  
5  
6 669 75. *Immunophenotyping assessment in a COVID-19 cohort (IMPACC): A prospective*  
7 670 *longitudinal study*. Sci Immunol, 2021. **6**(62).  
8 671 76. Shah, P., et al., *A microfluidics-based in vitro model of the gastrointestinal human-*  
9 672 *microbe interface*. Nature Communications, 2016. **7**(1): p. 11535.  
10 673 77. Aho, V.T.E., et al., *SnapShot: The Expobiome Map*. Cell Host Microbe, 2022. **30**(9): p.  
11 674 1340-1340.e1.  
12  
13 675 78. Tusher, V.G., R. Tibshirani, and G. Chu, *Significance analysis of microarrays applied to*  
14 676 *the ionizing radiation response*. Proc Natl Acad Sci U S A, 2001. **98**(9): p. 5116-21.  
15 677 79. Finnell, J.S., et al., *Is fasting safe? A chart review of adverse events during medically*  
16 678 *supervised, water-only fasting*. BMC Complementary and Alternative Medicine,  
17 679 2018. **18**(1): p. 67.  
18 680 80. Chan, A.-W., et al., *SPIRIT 2013 explanation and elaboration: guidance for protocols*  
19 681 *of clinical trials*. BMJ : British Medical Journal, 2013. **346**: p. e7586.  
20  
21 682  
22  
23

## 683 Figure Legends

684 Figure 1. Study design. This figure illustrates the study design with five different arms in  
685 total, two of which continue with the longitudinal part of the study. Visits take place at the  
686 clinical sites at each timepoint and include the collection of the displayed samples. This  
687 image was generated using Biorender software (<http://www.biorender.com>). T, timepoint;  
688 W, week; D, day; M, month.

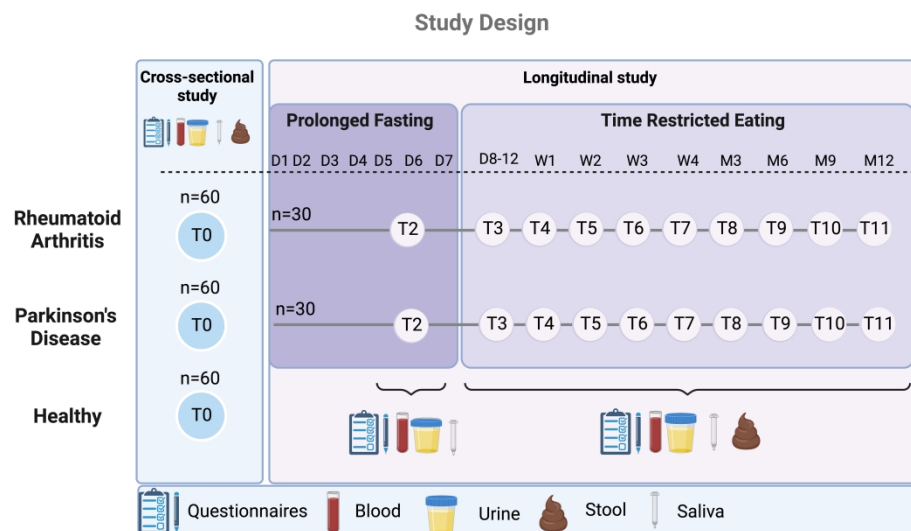

Figure 1. Study design. This figure illustrates the study design with five different arms in total, two of which continue with the longitudinal part of the study. Visits take place at the clinical sites at each timepoint and include the collection of the displayed samples. This image was generated using Biorender software (<http://www.biorender.com>). T, timepoint; W, week; D, day; M, month.

279x177mm (600 x 600 DPI)

# Reporting checklist for protocol of a clinical trial.

Based on the SPIRIT guidelines.

## Instructions to authors

Complete this checklist by entering the page numbers from your manuscript where readers will find each of the items listed below.

Your article may not currently address all the items on the checklist. Please modify your text to include the missing information. If you are certain that an item does not apply, please write "n/a" and provide a short explanation.

Upload your completed checklist as an extra file when you submit to a journal.

In your methods section, say that you used the SPIRIT reporting guidelines, and cite them as:

Chan A-W, Tetzlaff JM, Gøtzsche PC, Altman DG, Mann H, Berlin J, Dickersin K, Hróbjartsson A, Schulz KF, Parulekar WR, Krleža-Jerić K, Laupacis A, Moher D. SPIRIT 2013 Explanation and Elaboration: Guidance for protocols of clinical trials. *BMJ*. 2013;346:e7586

|                                             |                     | Reporting Item                                                                                               | Page Number |
|---------------------------------------------|---------------------|--------------------------------------------------------------------------------------------------------------|-------------|
| <b>Administrative information</b>           |                     |                                                                                                              |             |
| Title                                       | <a href="#">#1</a>  | Descriptive title identifying the study design, population, interventions, and, if applicable, trial acronym | 1           |
| Trial registration                          | <a href="#">#2a</a> | Trial identifier and registry name. If not yet registered, name of intended registry                         | 2           |
| Trial registration: data set                | <a href="#">#2b</a> | All items from the World Health Organization Trial Registration Data Set                                     | n/a         |
| Protocol version                            | <a href="#">#3</a>  | Date and version identifier                                                                                  | n/a         |
| Funding                                     | <a href="#">#4</a>  | Sources and types of financial, material, and other support                                                  | 12          |
| Roles and responsibilities: contributorship | <a href="#">#5a</a> | Names, affiliations, and roles of protocol contributors                                                      | 1           |

|    |                           |                     |                                                                    |       |
|----|---------------------------|---------------------|--------------------------------------------------------------------|-------|
| 1  | Roles and                 | <a href="#">#5b</a> | Name and contact information for the trial sponsor                 | 1     |
| 2  | responsibilities:         |                     |                                                                    |       |
| 3  | sponsor contact           |                     |                                                                    |       |
| 4  | information               |                     |                                                                    |       |
| 5  |                           |                     |                                                                    |       |
| 6  |                           |                     |                                                                    |       |
| 7  |                           |                     |                                                                    |       |
| 8  | Roles and                 | <a href="#">#5c</a> | Role of study sponsor and funders, if any, in study design;        | 1, 12 |
| 9  | responsibilities:         |                     | collection, management, analysis, and interpretation of data;      |       |
| 10 | sponsor and funder        |                     | writing of the report; and the decision to submit the report for   |       |
| 11 |                           |                     | publication, including whether they will have ultimate authority   |       |
| 12 |                           |                     | over any of these activities                                       |       |
| 13 |                           |                     |                                                                    |       |
| 14 |                           |                     |                                                                    |       |
| 15 |                           |                     |                                                                    |       |
| 16 | Roles and                 | <a href="#">#5d</a> | Composition, roles, and responsibilities of the coordinating       | 1, 12 |
| 17 | responsibilities:         |                     | centre, steering committee, endpoint adjudication committee,       |       |
| 18 | committees                |                     | data management team, and other individuals or groups              |       |
| 19 |                           |                     | overseeing the trial, if applicable (see Item 21a for data         |       |
| 20 |                           |                     | monitoring committee)                                              |       |
| 21 |                           |                     |                                                                    |       |
| 22 |                           |                     |                                                                    |       |
| 23 |                           |                     |                                                                    |       |
| 24 | <b>Introduction</b>       |                     |                                                                    |       |
| 25 |                           |                     |                                                                    |       |
| 26 |                           |                     |                                                                    |       |
| 27 | Background and            | <a href="#">#6a</a> | Description of research question and justification for undertaking | 5     |
| 28 | rationale                 |                     | the trial, including summary of relevant studies (published and    |       |
| 29 |                           |                     | unpublished) examining benefits and harms for each intervention    |       |
| 30 |                           |                     |                                                                    |       |
| 31 |                           |                     |                                                                    |       |
| 32 | Background and            | <a href="#">#6b</a> | Explanation for choice of comparators                              | 5     |
| 33 | rationale: choice of      |                     |                                                                    |       |
| 34 | comparators               |                     |                                                                    |       |
| 35 |                           |                     |                                                                    |       |
| 36 |                           |                     |                                                                    |       |
| 37 | Objectives                | <a href="#">#7</a>  | Specific objectives or hypotheses                                  | 5     |
| 38 |                           |                     |                                                                    |       |
| 39 |                           |                     |                                                                    |       |
| 40 | Trial design              | <a href="#">#8</a>  | Description of trial design including type of trial (eg, parallel  | 5     |
| 41 |                           |                     | group, crossover, factorial, single group), allocation ratio, and  |       |
| 42 |                           |                     | framework (eg, superiority, equivalence, non-inferiority,          |       |
| 43 |                           |                     | exploratory)                                                       |       |
| 44 |                           |                     |                                                                    |       |
| 45 |                           |                     |                                                                    |       |
| 46 | <b>Methods:</b>           |                     |                                                                    |       |
| 47 | <b>Participants,</b>      |                     |                                                                    |       |
| 48 | <b>interventions, and</b> |                     |                                                                    |       |
| 49 | <b>outcomes</b>           |                     |                                                                    |       |
| 50 |                           |                     |                                                                    |       |
| 51 |                           |                     |                                                                    |       |
| 52 |                           |                     |                                                                    |       |
| 53 | Study setting             | <a href="#">#9</a>  | Description of study settings (eg, community clinic, academic      | 6     |
| 54 |                           |                     | hospital) and list of countries where data will be collected.      |       |
| 55 |                           |                     | Reference to where list of study sites can be obtained             |       |
| 56 |                           |                     |                                                                    |       |
| 57 |                           |                     |                                                                    |       |
| 58 |                           |                     |                                                                    |       |
| 59 |                           |                     |                                                                    |       |
| 60 |                           |                     |                                                                    |       |

|    |                              |                      |                                                                                                                                                                                                                                                                                                                                                                                |     |
|----|------------------------------|----------------------|--------------------------------------------------------------------------------------------------------------------------------------------------------------------------------------------------------------------------------------------------------------------------------------------------------------------------------------------------------------------------------|-----|
| 1  | Eligibility criteria         | <a href="#">#10</a>  | Inclusion and exclusion criteria for participants. If applicable, eligibility criteria for study centres and individuals who will perform the interventions (eg, surgeons, psychotherapists)                                                                                                                                                                                   | 6   |
| 2  |                              |                      |                                                                                                                                                                                                                                                                                                                                                                                |     |
| 3  |                              |                      |                                                                                                                                                                                                                                                                                                                                                                                |     |
| 4  |                              |                      |                                                                                                                                                                                                                                                                                                                                                                                |     |
| 5  |                              |                      |                                                                                                                                                                                                                                                                                                                                                                                |     |
| 6  | Interventions:               | <a href="#">#11a</a> | Interventions for each group with sufficient detail to allow replication, including how and when they will be administered                                                                                                                                                                                                                                                     | 5,7 |
| 7  | description                  |                      |                                                                                                                                                                                                                                                                                                                                                                                |     |
| 8  |                              |                      |                                                                                                                                                                                                                                                                                                                                                                                |     |
| 9  |                              |                      |                                                                                                                                                                                                                                                                                                                                                                                |     |
| 10 | Interventions:               | <a href="#">#11b</a> | Criteria for discontinuing or modifying allocated interventions for a given trial participant (eg, drug dose change in response to harms, participant request, or improving / worsening disease)                                                                                                                                                                               | 5,7 |
| 11 | modifications                |                      |                                                                                                                                                                                                                                                                                                                                                                                |     |
| 12 |                              |                      |                                                                                                                                                                                                                                                                                                                                                                                |     |
| 13 |                              |                      |                                                                                                                                                                                                                                                                                                                                                                                |     |
| 14 |                              |                      |                                                                                                                                                                                                                                                                                                                                                                                |     |
| 15 | Interventions:               | <a href="#">#11c</a> | Strategies to improve adherence to intervention protocols, and any procedures for monitoring adherence (eg, drug tablet return; laboratory tests)                                                                                                                                                                                                                              | 7   |
| 16 | adherence                    |                      |                                                                                                                                                                                                                                                                                                                                                                                |     |
| 17 |                              |                      |                                                                                                                                                                                                                                                                                                                                                                                |     |
| 18 |                              |                      |                                                                                                                                                                                                                                                                                                                                                                                |     |
| 19 |                              |                      |                                                                                                                                                                                                                                                                                                                                                                                |     |
| 20 |                              |                      |                                                                                                                                                                                                                                                                                                                                                                                |     |
| 21 | Interventions:               | <a href="#">#11d</a> | Relevant concomitant care and interventions that are permitted or prohibited during the trial                                                                                                                                                                                                                                                                                  | 6   |
| 22 | concomitant care             |                      |                                                                                                                                                                                                                                                                                                                                                                                |     |
| 23 |                              |                      |                                                                                                                                                                                                                                                                                                                                                                                |     |
| 24 |                              |                      |                                                                                                                                                                                                                                                                                                                                                                                |     |
| 25 | Outcomes                     | <a href="#">#12</a>  | Primary, secondary, and other outcomes, including the specific measurement variable (eg, systolic blood pressure), analysis metric (eg, change from baseline, final value, time to event), method of aggregation (eg, median, proportion), and time point for each outcome. Explanation of the clinical relevance of chosen efficacy and harm outcomes is strongly recommended | 11  |
| 26 |                              |                      |                                                                                                                                                                                                                                                                                                                                                                                |     |
| 27 |                              |                      |                                                                                                                                                                                                                                                                                                                                                                                |     |
| 28 |                              |                      |                                                                                                                                                                                                                                                                                                                                                                                |     |
| 29 |                              |                      |                                                                                                                                                                                                                                                                                                                                                                                |     |
| 30 |                              |                      |                                                                                                                                                                                                                                                                                                                                                                                |     |
| 31 |                              |                      |                                                                                                                                                                                                                                                                                                                                                                                |     |
| 32 |                              |                      |                                                                                                                                                                                                                                                                                                                                                                                |     |
| 33 |                              |                      |                                                                                                                                                                                                                                                                                                                                                                                |     |
| 34 | Participant timeline         | <a href="#">#13</a>  | Time schedule of enrolment, interventions (including any run-ins and washouts), assessments, and visits for participants. A schematic diagram is highly recommended (see Figure)                                                                                                                                                                                               | 5   |
| 35 |                              |                      |                                                                                                                                                                                                                                                                                                                                                                                |     |
| 36 |                              |                      |                                                                                                                                                                                                                                                                                                                                                                                |     |
| 37 |                              |                      |                                                                                                                                                                                                                                                                                                                                                                                |     |
| 38 |                              |                      |                                                                                                                                                                                                                                                                                                                                                                                |     |
| 39 |                              |                      |                                                                                                                                                                                                                                                                                                                                                                                |     |
| 40 | Sample size                  | <a href="#">#14</a>  | Estimated number of participants needed to achieve study objectives and how it was determined, including clinical and statistical assumptions supporting any sample size calculations                                                                                                                                                                                          | 11  |
| 41 |                              |                      |                                                                                                                                                                                                                                                                                                                                                                                |     |
| 42 |                              |                      |                                                                                                                                                                                                                                                                                                                                                                                |     |
| 43 |                              |                      |                                                                                                                                                                                                                                                                                                                                                                                |     |
| 44 |                              |                      |                                                                                                                                                                                                                                                                                                                                                                                |     |
| 45 | Recruitment                  | <a href="#">#15</a>  | Strategies for achieving adequate participant enrolment to reach target sample size                                                                                                                                                                                                                                                                                            | 5   |
| 46 |                              |                      |                                                                                                                                                                                                                                                                                                                                                                                |     |
| 47 |                              |                      |                                                                                                                                                                                                                                                                                                                                                                                |     |
| 48 |                              |                      |                                                                                                                                                                                                                                                                                                                                                                                |     |
| 49 | <b>Methods: Assignment</b>   |                      |                                                                                                                                                                                                                                                                                                                                                                                |     |
| 50 | <b>of interventions (for</b> |                      |                                                                                                                                                                                                                                                                                                                                                                                |     |
| 51 | <b>controlled trials)</b>    |                      |                                                                                                                                                                                                                                                                                                                                                                                |     |
| 52 |                              |                      |                                                                                                                                                                                                                                                                                                                                                                                |     |
| 53 |                              |                      |                                                                                                                                                                                                                                                                                                                                                                                |     |
| 54 | Allocation: sequence         | <a href="#">#16a</a> | Method of generating the allocation sequence (eg, computer-generated random numbers), and list of any factors for stratification. To reduce predictability of a random sequence, details of any planned restriction (eg, blocking) should be                                                                                                                                   | n/a |
| 55 | generation                   |                      |                                                                                                                                                                                                                                                                                                                                                                                |     |
| 56 |                              |                      |                                                                                                                                                                                                                                                                                                                                                                                |     |
| 57 |                              |                      |                                                                                                                                                                                                                                                                                                                                                                                |     |
| 58 |                              |                      |                                                                                                                                                                                                                                                                                                                                                                                |     |
| 59 |                              |                      |                                                                                                                                                                                                                                                                                                                                                                                |     |
| 60 |                              |                      |                                                                                                                                                                                                                                                                                                                                                                                |     |

provided in a separate document that is unavailable to those who enrol participants or assign interventions

|    |                        |                      |                                                                     |
|----|------------------------|----------------------|---------------------------------------------------------------------|
| 1  |                        |                      |                                                                     |
| 2  |                        |                      |                                                                     |
| 3  |                        |                      |                                                                     |
| 4  | Allocation             | <a href="#">#16b</a> | Mechanism of implementing the allocation sequence (eg, central      |
| 5  | concealment            |                      | telephone; sequentially numbered, opaque, sealed envelopes),        |
| 6  |                        |                      | describing any steps to conceal the sequence until interventions    |
| 7  | mechanism              |                      | are assigned                                                        |
| 8  |                        |                      |                                                                     |
| 9  |                        |                      |                                                                     |
| 10 |                        |                      |                                                                     |
| 11 | Allocation:            | <a href="#">#16c</a> | Who will generate the allocation sequence, who will enrol           |
| 12 | implementation         |                      | participants, and who will assign participants to interventions     |
| 13 |                        |                      |                                                                     |
| 14 |                        |                      |                                                                     |
| 15 | Blinding (masking)     | <a href="#">#17a</a> | Who will be blinded after assignment to interventions (eg, trial    |
| 16 |                        |                      | participants, care providers, outcome assessors, data analysts),    |
| 17 |                        |                      | and how                                                             |
| 18 |                        |                      |                                                                     |
| 19 |                        |                      |                                                                     |
| 20 | Blinding (masking):    | <a href="#">#17b</a> | If blinded, circumstances under which unblinding is permissible,    |
| 21 | emergency unblinding   |                      | and procedure for revealing a participant's allocated intervention  |
| 22 |                        |                      | during the trial                                                    |
| 23 |                        |                      |                                                                     |
| 24 |                        |                      |                                                                     |
| 25 | <b>Methods: Data</b>   |                      |                                                                     |
| 26 | <b>collection,</b>     |                      |                                                                     |
| 27 | <b>management, and</b> |                      |                                                                     |
| 28 | <b>analysis</b>        |                      |                                                                     |
| 29 |                        |                      |                                                                     |
| 30 |                        |                      |                                                                     |
| 31 |                        |                      |                                                                     |
| 32 | Data collection plan   | <a href="#">#18a</a> | Plans for assessment and collection of outcome, baseline, and       |
| 33 |                        |                      | other trial data, including any related processes to promote data   |
| 34 |                        |                      | quality (eg, duplicate measurements, training of assessors) and a   |
| 35 |                        |                      | description of study instruments (eg, questionnaires, laboratory    |
| 36 |                        |                      | tests) along with their reliability and validity, if known.         |
| 37 |                        |                      | Reference to where data collection forms can be found, if not in    |
| 38 |                        |                      | the protocol                                                        |
| 39 |                        |                      |                                                                     |
| 40 |                        |                      |                                                                     |
| 41 |                        |                      |                                                                     |
| 42 |                        |                      |                                                                     |
| 43 | Data collection plan:  | <a href="#">#18b</a> | Plans to promote participant retention and complete follow-up,      |
| 44 | retention              |                      | including list of any outcome data to be collected for participants |
| 45 |                        |                      | who discontinue or deviate from intervention protocols              |
| 46 |                        |                      |                                                                     |
| 47 |                        |                      |                                                                     |
| 48 |                        |                      |                                                                     |
| 49 | Data management        | <a href="#">#19</a>  | Plans for data entry, coding, security, and storage, including any  |
| 50 |                        |                      | related processes to promote data quality (eg, double data entry;   |
| 51 |                        |                      | range checks for data values). Reference to where details of data   |
| 52 |                        |                      | management procedures can be found, if not in the protocol          |
| 53 |                        |                      |                                                                     |
| 54 |                        |                      |                                                                     |
| 55 | Statistics: outcomes   | <a href="#">#20a</a> | Statistical methods for analysing primary and secondary             |
| 56 |                        |                      | outcomes. Reference to where other details of the statistical       |
| 57 |                        |                      | analysis plan can be found, if not in the protocol                  |
| 58 |                        |                      |                                                                     |
| 59 |                        |                      |                                                                     |
| 60 |                        |                      |                                                                     |

|    |                            |                      |                                                                    |     |
|----|----------------------------|----------------------|--------------------------------------------------------------------|-----|
| 1  | Statistics: additional     | <a href="#">#20b</a> | Methods for any additional analyses (eg, subgroup and adjusted     | 12  |
| 2  | analyses                   |                      | analyses)                                                          |     |
| 3  |                            |                      |                                                                    |     |
| 4  | Statistics: analysis       | <a href="#">#20c</a> | Definition of analysis population relating to protocol non-        | 12  |
| 5  | population and missing     |                      | adherence (eg, as randomised analysis), and any statistical        |     |
| 6  | data                       |                      | methods to handle missing data (eg, multiple imputation)           |     |
| 7  |                            |                      |                                                                    |     |
| 8  |                            |                      |                                                                    |     |
| 9  |                            |                      |                                                                    |     |
| 10 | <b>Methods: Monitoring</b> |                      |                                                                    |     |
| 11 |                            |                      |                                                                    |     |
| 12 | Data monitoring:           | <a href="#">#21a</a> | Composition of data monitoring committee (DMC); summary of         | 12  |
| 13 | formal committee           |                      | its role and reporting structure; statement of whether it is       |     |
| 14 |                            |                      | independent from the sponsor and competing interests; and          |     |
| 15 |                            |                      | reference to where further details about its charter can be found, |     |
| 16 |                            |                      | if not in the protocol. Alternatively, an explanation of why a     |     |
| 17 |                            |                      | DMC is not needed                                                  |     |
| 18 |                            |                      |                                                                    |     |
| 19 |                            |                      |                                                                    |     |
| 20 |                            |                      |                                                                    |     |
| 21 |                            |                      |                                                                    |     |
| 22 | Data monitoring:           | <a href="#">#21b</a> | Description of any interim analyses and stopping guidelines,       | n/a |
| 23 | interim analysis           |                      | including who will have access to these interim results and make   |     |
| 24 |                            |                      | the final decision to terminate the trial                          |     |
| 25 |                            |                      |                                                                    |     |
| 26 |                            |                      |                                                                    |     |
| 27 | Harms                      | <a href="#">#22</a>  | Plans for collecting, assessing, reporting, and managing solicited | 12  |
| 28 |                            |                      | and spontaneously reported adverse events and other unintended     |     |
| 29 |                            |                      | effects of trial interventions or trial conduct                    |     |
| 30 |                            |                      |                                                                    |     |
| 31 |                            |                      |                                                                    |     |
| 32 |                            |                      |                                                                    |     |
| 33 | Auditing                   | <a href="#">#23</a>  | Frequency and procedures for auditing trial conduct, if any, and   | n/a |
| 34 |                            |                      | whether the process will be independent from investigators and     |     |
| 35 |                            |                      | the sponsor                                                        |     |
| 36 |                            |                      |                                                                    |     |
| 37 |                            |                      |                                                                    |     |
| 38 | <b>Ethics and</b>          |                      |                                                                    |     |
| 39 | <b>dissemination</b>       |                      |                                                                    |     |
| 40 |                            |                      |                                                                    |     |
| 41 |                            |                      |                                                                    |     |
| 42 | Research ethics            | <a href="#">#24</a>  | Plans for seeking research ethics committee / institutional review | 2   |
| 43 | approval                   |                      | board (REC / IRB) approval                                         |     |
| 44 |                            |                      |                                                                    |     |
| 45 |                            |                      |                                                                    |     |
| 46 | Protocol amendments        | <a href="#">#25</a>  | Plans for communicating important protocol modifications (eg,      | 2   |
| 47 |                            |                      | changes to eligibility criteria, outcomes, analyses) to relevant   |     |
| 48 |                            |                      | parties (eg, investigators, REC / IRBs, trial participants, trial  |     |
| 49 |                            |                      | registries, journals, regulators)                                  |     |
| 50 |                            |                      |                                                                    |     |
| 51 |                            |                      |                                                                    |     |
| 52 |                            |                      |                                                                    |     |
| 53 | Consent or assent          | <a href="#">#26a</a> | Who will obtain informed consent or assent from potential trial    | 6   |
| 54 |                            |                      | participants or authorised surrogates, and how (see Item 32)       |     |
| 55 |                            |                      |                                                                    |     |
| 56 |                            |                      |                                                                    |     |
| 57 |                            |                      |                                                                    |     |
| 58 |                            |                      |                                                                    |     |
| 59 |                            |                      |                                                                    |     |
| 60 |                            |                      |                                                                    |     |



|    |                          |                      |                                                                      |     |
|----|--------------------------|----------------------|----------------------------------------------------------------------|-----|
| 1  | Consent or assent:       | <a href="#">#26b</a> | Additional consent provisions for collection and use of              | 6   |
| 2  | ancillary studies        |                      | participant data and biological specimens in ancillary studies, if   |     |
| 3  |                          |                      | applicable                                                           |     |
| 4  |                          |                      |                                                                      |     |
| 5  |                          |                      |                                                                      |     |
| 6  | Confidentiality          | <a href="#">#27</a>  | How personal information about potential and enrolled                | 12  |
| 7  |                          |                      | participants will be collected, shared, and maintained in order to   |     |
| 8  |                          |                      | protect confidentiality before, during, and after the trial          |     |
| 9  |                          |                      |                                                                      |     |
| 10 |                          |                      |                                                                      |     |
| 11 | Declaration of interests | <a href="#">#28</a>  | Financial and other competing interests for principal investigators  | 14  |
| 12 |                          |                      | for the overall trial and each study site                            |     |
| 13 |                          |                      |                                                                      |     |
| 14 |                          |                      |                                                                      |     |
| 15 | Data access              | <a href="#">#29</a>  | Statement of who will have access to the final trial dataset, and    | 12  |
| 16 |                          |                      | disclosure of contractual agreements that limit such access for      |     |
| 17 |                          |                      | investigators                                                        |     |
| 18 |                          |                      |                                                                      |     |
| 19 |                          |                      |                                                                      |     |
| 20 | Ancillary and post trial | <a href="#">#30</a>  | Provisions, if any, for ancillary and post-trial care, and for       | n/a |
| 21 | care                     |                      | compensation to those who suffer harm from trial participation       |     |
| 22 |                          |                      |                                                                      |     |
| 23 |                          |                      |                                                                      |     |
| 24 | Dissemination policy:    | <a href="#">#31a</a> | Plans for investigators and sponsor to communicate trial results     | 2   |
| 25 | trial results            |                      | to participants, healthcare professionals, the public, and other     |     |
| 26 |                          |                      | relevant groups (eg, via publication, reporting in results           |     |
| 27 |                          |                      | databases, or other data sharing arrangements), including any        |     |
| 28 |                          |                      | publication restrictions                                             |     |
| 29 |                          |                      |                                                                      |     |
| 30 |                          |                      |                                                                      |     |
| 31 |                          |                      |                                                                      |     |
| 32 |                          |                      |                                                                      |     |
| 33 | Dissemination policy:    | <a href="#">#31b</a> | Authorship eligibility guidelines and any intended use of            | 14  |
| 34 | authorship               |                      | professional writers                                                 |     |
| 35 |                          |                      |                                                                      |     |
| 36 |                          |                      |                                                                      |     |
| 37 | Dissemination policy:    | <a href="#">#31c</a> | Plans, if any, for granting public access to the full protocol,      | n/a |
| 38 | reproducible research    |                      | participant-level dataset, and statistical code                      |     |
| 39 |                          |                      |                                                                      |     |
| 40 |                          |                      |                                                                      |     |
| 41 | <b>Appendices</b>        |                      |                                                                      |     |
| 42 |                          |                      |                                                                      |     |
| 43 | Informed consent         | <a href="#">#32</a>  | Model consent form and other related documentation given to          | 6   |
| 44 | materials                |                      | participants and authorised surrogates                               |     |
| 45 |                          |                      |                                                                      |     |
| 46 |                          |                      |                                                                      |     |
| 47 | Biological specimens     | <a href="#">#33</a>  | Plans for collection, laboratory evaluation, and storage of          | 7   |
| 48 |                          |                      | biological specimens for genetic or molecular analysis in the        |     |
| 49 |                          |                      | current trial and for future use in ancillary studies, if applicable |     |
| 50 |                          |                      |                                                                      |     |
| 51 |                          |                      |                                                                      |     |

52 The SPIRIT Explanation and Elaboration paper is distributed under the terms of the Creative Commons  
 53 Attribution License CC-BY-NC. This checklist was completed on 07. November 2022 using  
 54 <https://www.goodreports.org/>, a tool made by the [EQUATOR Network](#) in collaboration with [Penelope.ai](#)

# BMJ Open

**Protocol for a multicentre cross-sectional, longitudinal ambulatory clinical trial in rheumatoid arthritis and Parkinson's disease patients analysing the relation between the gut microbiome, fasting and immune status (ExpoBiome)**

|                                 |                                                                                                                                                                                                                                                                                                                                                                                                                                                                                                                                                                                                                                                                                                                                                                                                                                                                                                                                                                                                                                                                                                                                                                                                                                                                                                                                                                                                                                                                                                                                                                                                                                                                                      |
|---------------------------------|--------------------------------------------------------------------------------------------------------------------------------------------------------------------------------------------------------------------------------------------------------------------------------------------------------------------------------------------------------------------------------------------------------------------------------------------------------------------------------------------------------------------------------------------------------------------------------------------------------------------------------------------------------------------------------------------------------------------------------------------------------------------------------------------------------------------------------------------------------------------------------------------------------------------------------------------------------------------------------------------------------------------------------------------------------------------------------------------------------------------------------------------------------------------------------------------------------------------------------------------------------------------------------------------------------------------------------------------------------------------------------------------------------------------------------------------------------------------------------------------------------------------------------------------------------------------------------------------------------------------------------------------------------------------------------------|
| Journal:                        | <i>BMJ Open</i>                                                                                                                                                                                                                                                                                                                                                                                                                                                                                                                                                                                                                                                                                                                                                                                                                                                                                                                                                                                                                                                                                                                                                                                                                                                                                                                                                                                                                                                                                                                                                                                                                                                                      |
| Manuscript ID                   | bmjopen-2022-071380.R2                                                                                                                                                                                                                                                                                                                                                                                                                                                                                                                                                                                                                                                                                                                                                                                                                                                                                                                                                                                                                                                                                                                                                                                                                                                                                                                                                                                                                                                                                                                                                                                                                                                               |
| Article Type:                   | Protocol                                                                                                                                                                                                                                                                                                                                                                                                                                                                                                                                                                                                                                                                                                                                                                                                                                                                                                                                                                                                                                                                                                                                                                                                                                                                                                                                                                                                                                                                                                                                                                                                                                                                             |
| Date Submitted by the Author:   | 12-Jul-2023                                                                                                                                                                                                                                                                                                                                                                                                                                                                                                                                                                                                                                                                                                                                                                                                                                                                                                                                                                                                                                                                                                                                                                                                                                                                                                                                                                                                                                                                                                                                                                                                                                                                          |
| Complete List of Authors:       | <p>Hansen, Bérénice; LCSB<br/> Laczny, Cédric C.; LCSB<br/> Aho, Velma T.E.; LCSB<br/> Frachet-Bour, Audrey; LCSB<br/> Habier, Janine; LCSB<br/> Ostaszewski, Marek; LCSB<br/> Michalsen, Andreas; Charité Universitätsmedizin Berlin, Institute for Social Medicine, Epidemiology and Health Economics; Immanuel Hospital Berlin-Wannsee Branch, Department of Internal and Integrative Medicine<br/> Hanslian, Etienne; Charite Universitätsmedizin Berlin, Institute for Social Medicine, Epidemiology and Health Economics; Immanuel Hospital Berlin-Wannsee Branch<br/> Koppold-Liebscher, Daniela; Charité Universitätsmedizin Berlin, Institute for Social Medicine, Epidemiology and Health Economics; Immanuel Hospital Berlin-Wannsee Branch<br/> Hartmann, Anika; Charité Universitätsmedizin Berlin, Institute of Social Medicine, Epidemiology and Health Economics; Charité Universitätsmedizin Berlin, Department of Dermatology, Venereology and Allergology<br/> Steckhan, Nico; Charité Universitätsmedizin Berlin, Institute for Social Medicine, Epidemiology and Health Economics; University of Potsdam, Digital Health - Connected Healthcare, Hasso Plattner Institute<br/> Mollenhauer, Brit; University Medical Center Göttingen; Paracelsus-Kliniken Deutschland GmbH<br/> Schade, Sebastian; University Medical Center Göttingen; Paracelsus-Kliniken Deutschland GmbH,<br/> Roomp, Kirsten; LCSB<br/> Schneider, Jochen; LCSB; Saarland University Hospital and Saarland University Faculty of Medicine, Department of Internal Medicine and Psychiatry<br/> Wilmes, Paul; LCSB; University of Luxembourg, Department of Life Sciences and Medicine</p> |
| <b>Primary Subject Heading</b>: | Nutrition and metabolism                                                                                                                                                                                                                                                                                                                                                                                                                                                                                                                                                                                                                                                                                                                                                                                                                                                                                                                                                                                                                                                                                                                                                                                                                                                                                                                                                                                                                                                                                                                                                                                                                                                             |
| Secondary Subject Heading:      | Immunology (including allergy), Rheumatology, Pharmacology and                                                                                                                                                                                                                                                                                                                                                                                                                                                                                                                                                                                                                                                                                                                                                                                                                                                                                                                                                                                                                                                                                                                                                                                                                                                                                                                                                                                                                                                                                                                                                                                                                       |

1  
2  
3  
4  
5  
6  
7  
8  
9  
10  
11  
12  
13  
14  
15  
16  
17  
18  
19  
20  
21  
22  
23  
24  
25  
26  
27  
28  
29  
30  
31  
32  
33  
34  
35  
36  
37  
38  
39  
40  
41  
42  
43  
44  
45  
46  
47  
48  
49  
50  
51  
52  
53  
54  
55  
56  
57  
58  
59  
60

|           |                                                                                                                                                    |
|-----------|----------------------------------------------------------------------------------------------------------------------------------------------------|
|           | therapeutics, Neurology, Evidence based practice                                                                                                   |
| Keywords: | IMMUNOLOGY, Rheumatology < INTERNAL MEDICINE, MICROBIOLOGY, Parkinson-s disease < NEUROLOGY, NUTRITION & DIETETICS, Clinical trials < THERAPEUTICS |
|           |                                                                                                                                                    |

SCHOLARONE™  
Manuscripts

1  
2  
3  
4 1 **Protocol for a multicentre cross-sectional, longitudinal ambulatory**  
5  
6 2 **clinical trial in rheumatoid arthritis and Parkinson's disease patients**  
7  
8 3 **analysing the relation between the gut microbiome, fasting and**  
9  
10 4 **immune status (ExpoBiome)**

11 5  
12 6 Bérénice Hansen<sup>1</sup>, Cédric C. Laczny<sup>1</sup>, Velma T.E. Aho<sup>1</sup>, Audrey Frachet-Bour<sup>1</sup>, Janine Habier<sup>1</sup>, Marek  
13 7 Ostaszewski<sup>1</sup>, Andreas Michalsen<sup>4,5</sup>, Etienne Hanslian<sup>4,5</sup>, Daniela A. Koppold<sup>4,5,8</sup>, Anika Hartmann<sup>4,10</sup>,  
14 8 Nico Steckhan<sup>4,9</sup>, Brit Mollenhauer<sup>6,7</sup>, Sebastian Schade<sup>6,7</sup>, Kirsten Roomp<sup>1</sup>, Jochen G. Schneider<sup>1,3+</sup>,  
15 9 Paul Wilmes<sup>1,2+</sup>

16 10  
17 11 <sup>1</sup>Luxembourg Centre for Systems Biomedicine, University of Luxembourg, Campus Belval, 7, avenue des Hauts-  
18 12 Fourneaux, L-4362 Esch-sur-Alzette, Luxembourg

19 13  
20 14 <sup>2</sup>Department of Life Sciences and Medicine, University of Luxembourg, 7, avenue des Hauts-Fourneaux, L-4362  
21 15 Esch-sur-Alzette, Luxembourg

22 16  
23 17 <sup>3</sup>Department of Internal Medicine and Psychiatry, Saarland University Medical Center, D- 66421 Homburg Saar,  
24 18 Germany

25 19  
26 20 <sup>4</sup>Institute for Social Medicine, Epidemiology and Health Economics, Charité – Universitätsmedizin Berlin,  
27 21 corporate member of Freie Universität Berlin, Humboldt-Universität zu Berlin, and Berlin Institute of Health

28 22  
29 23 <sup>5</sup>Department of Internal and Integrative Medicine, Immanuel Hospital Berlin, Germany

30 24  
31 25 <sup>6</sup>Paracelsus-Elena-Klinik, Kassel, Germany

32 26  
33 27 <sup>7</sup>University Medical Center Göttingen, Germany

34 28  
35 29 <sup>8</sup>Department of Pediatrics, Division of Oncology and Hematology, Charité – Universitätsmedizin Berlin,  
36 30 Corporate Member of Freie Universität Berlin, Humboldt-Universität zu Berlin and Berlin Institute of Health,  
37 31 Berlin, Germany

38 32  
39 33 <sup>9</sup>Digital Health - Connected Healthcare, Hasso Plattner Institute, University of Potsdam, Potsdam, Germany

40 34  
41 35 <sup>10</sup>Department of Dermatology, Venereology and Allergology, Charité—Universitätsmedizin Berlin, Corporate  
42 36 Member of Freie Universität Berlin and Humboldt-Universität zu Berlin, Berlin, Germany

43 37  
44 38 +contributed equally

45 39  
46 40 \*Correspondence to:

47 41  
48 42 Jochen Schneider (jochen.schneider@uni.lu)

49 43 Paul Wilmes (paul.wilmes@uni.lu)

50 44  
51 45 Luxembourg Centre for Systems Biomedicine,  
52 46 University of Luxembourg, Campus Belval,  
53 47 7, avenue des Hauts-Fourneaux,  
54 48 L-4362 Esch-sur-Alzette, Luxembourg

55 49  
56 50 Word count: 4461

## Abstract

### Introduction

Chronic inflammatory diseases like rheumatoid arthritis (RA) and neurodegenerative disorders like Parkinson's disease (PD) have recently been associated with a decreased diversity in the gut microbiome, emerging as key driver of various diseases. The specific interactions between gut-borne microorganisms and host pathophysiology remain largely unclear. The microbiome can be modulated by interventions comprising nutrition.

The aim of our clinical study is to (1) examine effects of prolonged fasting and time-restricted eating (TRE) on the outcome parameters and the immunophenotypes of RA and PD with (2) special consideration of microbial taxa and molecules associated with changes expected in (1), and (3) identify factors impacting the disease course and treatment by in-depth screening of microorganisms and molecules in personalised HuMiX gut-on-chip models, to identify novel targets for anti-inflammatory therapy.

### Methods and Analysis

This trial is an open-label, multicentre, controlled clinical trial consisting of a cross-sectional and a longitudinal study. A total of 180 patients is recruited. For the cross-sectional study, 60 patients with PD, 60 patients with RA and 60 healthy controls are recruited at two different, specialized clinical sites. For the longitudinal part, 30 patients with PD and 30 patients with RA undergo 5-7 days of prolonged fasting (PF) followed by TRE (16:8) for a period of 12 months. One baseline visit takes place before the PF intervention and 10 follow-up visits will follow over a period of 12 months (April 2021 to November 2023).

### Ethics and dissemination

Ethical approval was obtained to plan and conduct the trial from the institutional review board of the Charité-Universitätsmedizin Berlin (EA1/204/19), the ethics committee of the state medical association (Landesärztekammer) of Hessen (2021-2230-zvBO) and the Ethics Review Panel (ERP) of the University of Luxembourg (ERP 21-001-A ExpoBiome). The results of this study will be disseminated through peer-reviewed publications, scientific presentations and social media.

### Trial registration number at [clinicaltrials.gov](https://clinicaltrials.gov):

NCT04847011

**Key words:** Microbiome, fasting therapy, intermittent fasting, time restricted eating, chronic disease, rheumatoid arthritis, Parkinson's disease, nutrition, chronic diseases, ExpoBiome, inflammation, gut on a chip, HuMiX, immunophenotype, metagenomics, metatranscriptomics, metaproteomics, metabolomics

### Strengths and limitations of the study

- The participants of the longitudinal study will be closely monitored for 12 months and routine blood parameters as well as anthropometric data and questionnaires will be precisely documented.

- 94 • This study will identify novel microbiome-derived common and disease-associated  
95 molecules involved in immune system modulation in two major chronic diseases: RA  
96 and PD.
- 97 • This study aims at also identifying novel targeted pathways to control chronic  
98 inflammatory conditions in the future.
- 99 • A limitation is the heterogeneity of the cohorts regarding age and sex, which is due to  
100 the prevalence of the diseases: RA is more common in women, while PD is more  
101 common in men and has a later disease onset.
- 102 • A bias exists in choosing RA and PD as chronic disorders to study immunophenotypes  
103 although generalisable results are targeted.  
104

## 105 Introduction (1339)

106  
107 The human microbiome is emerging as a key driver of various diseases through its complex of distinct  
108 yet connected biomolecules (referred to as the “*expobiome*”)[1, 2]. The expobiome comprises a  
109 diverse set of nucleic acids, polypeptides and metabolites which, in the gut alone, are present in  
110 substantial concentrations[1]. However, the specific interactions between gut-borne microorganisms  
111 and host (patho)physiology remain largely unknown. Although host genetics shape the composition  
112 of the gut microbiome, the latter is particularly influenced by non-genetic factors such as lifestyle and  
113 diet[3, 4]. Therefore, the microbiome is a plausible target to modify health outcomes.

114  
115 Individuals suffering from chronic diseases, including autoimmune, metabolic, and neurodegenerative  
116 diseases as well as cancer, often present alterations in their gut microbiome composition. These shifts  
117 are typically characterised by an overgrowth of one or several microbial species with likely adverse  
118 effects as well as a decrease in beneficial taxa[5]. Such imbalances are referred to as dysbiosis.  
119 Although structural microbiome changes are clearly detectable, the mechanistic or functional  
120 consequences of dysbiosis are still largely unknown. However, they may result in dysregulated  
121 interactions with the immune system[6]. Considering the intricacy of the immune system, the  
122 question arises whether the observed microbiome changes are cause or consequence of disease. This  
123 implies that, in addition to the genetic predisposition of the host, the gut microbiome needs to be  
124 considered a potential pathogenic factor or major driver of disease onset and course[3, 4].  
125

126 RA and PD are two specific examples representing dysregulated microbiome-immune system  
127 interactions [7, 8]. RA is a multifactorial, chronic, and systemic autoimmune disease, primarily  
128 affecting the lining of the synovial joints with a higher risk and younger age for disease onset in women  
129 and a global prevalence of 1%[9, 10]. The exact disease pathogenesis is still unclear and no cure for  
130 RA currently exists. In addition to the common local articular symptoms of RA, systemic comorbidities  
131 can affect the vasculature, metabolism and bones[11]. Besides various environmental risk factors e.g.  
132 smoking and a Western diet, the host microbiome is associated with the pathophysiology of the  
133 disease[12]. The diversity of the gut microbiome has been reported to be decreased in individuals with  
134 RA, compared with the general population, and is correlated with disease duration, activity, and  
135 autoantibody levels[13, 14]. Studies in murine models also report that autoimmune arthritis is strongly  
136 attenuated under germ-free conditions[15]. The introduction of specific bacteria, e.g. segmented  
137 filamentous bacteria, into germ-free animals or oral infection with *Porphyromonas gingivalis* drive  
138 autoimmune arthritis through activation of T helper cells[15]. Several different taxa, including  
139 *Prevotella copri*, *Lactobacillus* spp. and *Colinsella* spp. are enriched in the gut microbiome of patients  
140 with RA and correlate positively with disease markers e.g. immunoglobulins IgA and IgG , while other  
141 taxa like *Haemophilus* spp. and *Faecalibacterium* spp. are typically found at lower abundances in

1  
2  
3 142 patients with RA compared to healthy individuals[13, 16, 17]. Alterations of the gut microbiome may  
4 143 therefore have an important impact on RA pathophysiology[12].  
5 144

6 145 PD affects 0.4-2% of the population over 65 years worldwide and is the second most common  
7 146 progressive neurodegenerative disease with men being 1.5 times more likely to be affected than  
8 147 women[18]. Cardinal symptoms are motor deficiencies such as tremor and rigidity, but also include a  
9 148 wide range of non-motor symptoms, such as hyposmia, depression, insomnia or cognitive impairment,  
10 149 severely impacting patients' quality of life[19]. Aggregations of the protein  $\alpha$ -synuclein in the  
11 150 dopaminergic substantia nigra represent the main neuropathological manifestations[20]. PD-  
12 151 associated loss of dopaminergic neurons involves mechanisms of inflammatory and autoimmune  
13 152 responses with microglial activity as a major driver [21].Dysbiosis of the gut microbiome has been  
14 153 associated with the characteristic motor deficits and pathophysiological changes in the enteric and  
15 154 central nervous systems in animal studies. Increased relative abundances of the genera *Akkermansia*,  
16 155 *Bifidobacterium*, *Lactobacillus*, and *Methanobrevibacter* and decreased abundances in  
17 156 *Faecalibacterium* and *Roseburia* have been reported[22, 23]. Two recently published clinical-trials  
18 157 with prebiotic supplementation in PD observed a shift in gut microbiome composition, an increase in  
19 158 short-chain fatty acids (SCFA) and a reduction in non-motor-symptoms [24, 25]. Most patients with  
20 159 PD suffer from gastrointestinal symptoms such as constipation and irritable bowel syndrome (IBS) -  
21 160 like symptoms[26]. The gut-brain axis, e.g. by-products produced by the gut microbiome, may  
22 161 contribute to the production of  $\alpha$ -synuclein aggregates in the enteric nervous system[27]. In addition,  
23 162 increased intestinal permeability[28] as driver for enteric inflammation occur in PD and substantiate  
24 163 a role of peripheral inflammation in the initiation and the progression of the disease[29].  
25 164

26 165 One factor with known major impact on the gut microbiome and on chronic diseases is diet[7]. Dietary  
27 166 approaches as fasting have already been used by Hippocrates in the 5<sup>th</sup> century BCE and have been  
28 167 applied ever since by numerous medical schools to treat acute and chronic diseases [30-32]. Various  
29 168 practices of caloric restriction through fasting have repeatedly shown remarkable health benefits[33,  
30 169 34]. Maifeld *et al.* found that a 5-day fast followed by a modified Dietary Approach to Stop  
31 170 Hypertension (DASH), with additional emphasis on plant-based and Mediterranean diets, reduced  
32 171 systolic blood pressure, BMI, and the need for antihypertensive medications at three months post  
33 172 intervention compared with DASH alone [35].  
34 173

35 174 Furthermore, Choi *et al.* demonstrated that cycles of a fasting-mimicking diet suppress autoimmunity  
36 175 and stimulate remyelination via oligodendrocyte regeneration in a murine experimental autoimmune  
37 176 encephalomyelitis (EAE) model[36]. Jordan *et al.* described a reduction in monocyte metabolic and  
38 177 inflammatory activity after a short-term fast and conclude that fasting attenuates chronic  
39 178 inflammatory diseases without compromising monocyte capacity for mobilisation during acute  
40 179 infectious inflammation and tissue repair[37].  
41 180

42 181 These improvements can, however, typically only be maintained for a limited period of time, and the  
43 182 symptoms can reappear after reintroduction of the patients' standard diet. Hence, protocols to sustain  
44 183 these beneficial effects are of utmost importance. In mouse models of PD, intermittent fasting (IF) has  
45 184 led to several improvements including decreased excitotoxicity, reduced neurodegeneration and  
46 185 protection against autonomic dysfunction, motor and cognitive decline[38].  
47 186

48 187 IF and PF may have potent immunomodulatory effects which may partially be mediated by the gut  
49 188 microbiome and the fasting induced alterations of the latter[39]. These microbial shifts include  
50 189 upregulation of *Akkermansia muciniphila*, *Bacteroides fragilis*, other *Bacteroides* spp., Proteobacteria,  
51 190 and butyric acid producing *Lachnospiraceae*, but also *Odoribacter*, which is negatively associated with  
52 191 blood pressure[35, 40]. Interestingly, an overall decrease of the Firmicutes/Bacteroidetes ratio could  
53 192 be observed, a high ratio is commonly associated with several pathologies, including RA [41].  
54  
55  
56  
57  
58  
59  
60

193  
194 A potential mechanism underlying the observed beneficial effects induced by dietary interventions  
195 might be a direct gut microbiome-immune system interaction by pattern recognition. The microbiome  
196 can regulate the intestinal innate immune system by modulating toll-like receptor (TLR) expression on  
197 immunosensor cell surface through microbe-associated molecular patterns (MAMPs), which can  
198 consequently trigger cytokine production and up-regulation of molecules on antigen presenting cells,  
199 leading to activation of T cells[42]. Therefore, a change in gut microbiome composition can lead to  
200 different outcomes in immune signalling pathways and either favour or suppress inflammation and  
201 autoimmunity.

202  
203 The impact and importance of the gut microbiome on human physiology and its potential  
204 modifications by nutrition and dietary patterns, have been underestimated for centuries[43]. Reasons  
205 may include missing standardised therapeutic protocols, the interindividual variability in the response  
206 to fasting, lack of knowledge about possible adverse effects, and difficulties in the interpretation of  
207 underlying mechanisms seen in clinical trials, but also in the comparably low potential for achieving  
208 economic revenue or scientific impact[8].

209  
210 Modern experimental approaches and computational integration allow a multi-layer analysis of  
211 digestive processes in low caloric settings including the gut microbiome[44]. These technological  
212 developments also permit a closer investigation of the link between the immune system and severe  
213 caloric restriction.

214  
215 To our knowledge no clinical trials have been investigating the connection between IF or PF and PD in  
216 humans so far[38]. Our study aims to elucidate the causal relationship between the gut microbiome  
217 and the immune system. To do so, we will use analyses of the molecular basis of human-microbiome  
218 interactions enabled by high throughput methodologies such as the combination of metagenomics,  
219 metatranscriptomics and metaproteomics. Moreover, we are aiming at identifying new genes,  
220 proteins, metabolites, and host pathways facilitating the development of novel diagnostic and  
221 therapeutic tools[45, 46].

222

## 223 **Methods and Analysis (3122)**

224

### 225 **Study objectives**

226 The first objective of the study is to define specific gut microbiome-derived molecules in RA and PD,  
227 compared to healthy individuals, and relate this information to the immunophenotypes of the  
228 individuals. The second objective is to identify and track common and disease-specific molecular  
229 signatures to predict the outcome of a gut microbiome-targeted therapeutic intervention, here  
230 fasting, on inflammation-driven symptoms in RA and PD. The third objective of the study is to identify  
231 and validate microbiome-derived effector molecules which downregulate pro-inflammatory innate  
232 and adaptive immune pathways.

233

### 234 **Study design**

235 The ExpoBiome cohort consists of 180 adult individuals, meeting the exclusion and inclusion criteria  
236 (Table 1), for the cross-sectional study (objectives 1 and 3) and 60 adult individuals for the longitudinal  
237 study (objectives 2 and 3). There are five different arms in total: (1) RA – cross-sectional arm [60  
238 patients], (2) PD – cross-sectional arm [60 patients], and (3) healthy controls – cross-sectional arm [60  
239 patients], (4) RA – longitudinal arm [30 patients], (5) PD – longitudinal arm [30 patients] (Figure1).

240



At the first visit (T0), patients answer several questionnaires, and blood, urine, saliva, and stool samples are obtained (Table 2). The longitudinal arms (4) and (5) undergo a 5–7-day PF with a dietary energy supply of max. 350-400 kcal per day with vegetable or grain broths as well as fresh vegetable juices[31, 40]. After the PF, the longitudinal arms follow a dietary regimen including the concept of TRE for a period of 12 months following the 16:8 pattern[47]. This means that food intake is allowed ad libitum for 8 h, followed by 16 h of fasting where no food should be consumed. The intake of non-caloric beverages, e.g., water, unsweetened tea or coffee is, however, allowed. The participants attend one follow-up visit (T2) during the PF and 9 follow-up visits during the 12 months of TRE (Figure 1).

## Patient and Public Involvement

Feedback of patients during former clinical trials at the study centre in Berlin was integrated in the planning and design of the fasting intervention of this study. Patients are not involved in the conduct, reporting, or dissemination plans of this research.

## Recruitment and randomisation

Patients are recruited by the specialised sites via different sources, e.g., by direct referral from either a physician at the Immanuel Hospital Berlin and the outpatient department of the Institute of Social Medicine, Epidemiology and Health Economics at Charité-Universitätsmedizin Berlin, or the Paracelsus-Elena Clinic in Kassel, or by non-personal advertising strategies (e.g. flyers or social media). For PD, the patients are screened by an experienced movement disorders specialist for featuring at least two of resting tremor, bradykinesia, and rigidity according to the United Kingdom Parkinson's Disease Society Brain Bank criteria[48]. Additionally, patients must show evidence of a dopaminergic deficit, either with DaTScan imaging or with a clear response to dopaminergic drugs. Motor and non-motor symptoms are assessed with the MDS-UPDRS (part I – IV) including the Hoehn and Yahr (severity) scale[49]. Additional PD-specific scales as Parkinson's Disease Sleep Scale-2, Parkinson's Disease Questionnaire-39, Non-Motor Symptoms Questionnaire and Non-Motor Symptoms Scale are used.

For patients with RA, the diagnosis has been made prior to the study by an experienced rheumatologist according to the European League Against Rheumatism (EULAR) criteria[50]. All clinical stages of RA will be included. We excluded patients with a BMI <18.5, as this indicates underweight, and fasting is not recommended. We did, however, not include an upper limit as fasting might be especially beneficial for patients with a BMI >24.9 and more than 60% of patients with RA are classified as overweight or obese[51]. For comorbidities we excluded mainly diseases which are known to interfere with the gut microbiome and might be potential confounders.

The chosen exclusion criteria will optimize the pairing process of healthy controls and patients with either RA or PD. However, as we have two diseases with different anthropometric characteristics (including age, gender, BMI) and only one control group, adding additional inclusion and exclusion criteria in the recruitment process would compromise on optimized matching. Furthermore, for the longitudinal part of the study, each patient will serve as his/her own control over time. Participants meeting all the inclusion and no exclusion criteria (Table 1) are assigned to their respective groups (RA, PD, or healthy control) (Figure 1) for the cross-sectional study after written informed consent. Half of the patients from the RA group and half of the patients from the PD group is selected to take part in the longitudinal part of the study, including the fasting intervention according to their availability for all 11 visits and their willingness to follow TRE over 12 months. This study is an open-label trial, as blinding is not feasible in fasting interventions.

Table 1: Inclusion and exclusion criteria

| Inclusion criteria | Exclusion criteria |
|--------------------|--------------------|
|--------------------|--------------------|

|                                                                                                                                                                                                                                                                                                                                                                                                                                                                                                                                                                                                                                                                                                                                                                                        |                                                                                                                                                                                                                                                                                                                                                                                                                                                                                                                                                                                                                                                                                                                                                                                                                                                                                                                                                                                                                                                                                                                              |
|----------------------------------------------------------------------------------------------------------------------------------------------------------------------------------------------------------------------------------------------------------------------------------------------------------------------------------------------------------------------------------------------------------------------------------------------------------------------------------------------------------------------------------------------------------------------------------------------------------------------------------------------------------------------------------------------------------------------------------------------------------------------------------------|------------------------------------------------------------------------------------------------------------------------------------------------------------------------------------------------------------------------------------------------------------------------------------------------------------------------------------------------------------------------------------------------------------------------------------------------------------------------------------------------------------------------------------------------------------------------------------------------------------------------------------------------------------------------------------------------------------------------------------------------------------------------------------------------------------------------------------------------------------------------------------------------------------------------------------------------------------------------------------------------------------------------------------------------------------------------------------------------------------------------------|
| <ul style="list-style-type: none"> <li>• Age 18-79</li> <li>• One of the following diagnoses: rheumatoid arthritis (first diagnosis &gt;6 weeks ago), Parkinson's disease OR healthy volunteer</li> <li>• Control ("healthy") individuals must be without any evidence of active known or treated RA, without any evidence of active, known or treated central nervous system disease, and without a known family history of idiopathic PD</li> <li>• Control individuals should match the RA or PD individuals as closely as possible (sex, age, education)</li> <li>• Present written declaration of consent</li> <li>• Ability to understand the patient information and willingness to sign the consent form</li> <li>• Consent to specimen collection and specimen use</li> </ul> | <ul style="list-style-type: none"> <li>• Gout or proven bacterial arthritis</li> <li>• Participation in another study</li> <li>• Existing/current eating disorder (bulimia nervosa, anorexia nervosa) within the past 5 years</li> <li>• Severe internal disease (e.g. kidney deficiency with creatinine &gt; 2mg/dl)</li> <li>• Existing vegan diet or fasting during the last six months</li> <li>• Presence or suspicion of atypical PD (e.g. early dementia, early autonomous dysfunction)</li> <li>• Diagnosis of chronic inflammatory bowel diseases, celiac disease or colorectal cancer according to the guidelines of the German Society of Gastroenterology</li> <li>• Use of anti-psychotic drugs</li> <li>• Antibiotic use during the previous 12 months</li> <li>• Start of novel therapy with disease-modifying anti-rheumatic drugs</li> <li>• Pregnancy or breastfeeding women</li> <li>• Contraindication for additional blood draws (e.g. haemoglobin &lt;10)</li> <li>• BMI &lt; 18.5</li> <li>• Psychiatric illness that limits understanding of the examination protocol (unable to consent)</li> </ul> |
|----------------------------------------------------------------------------------------------------------------------------------------------------------------------------------------------------------------------------------------------------------------------------------------------------------------------------------------------------------------------------------------------------------------------------------------------------------------------------------------------------------------------------------------------------------------------------------------------------------------------------------------------------------------------------------------------------------------------------------------------------------------------------------------|------------------------------------------------------------------------------------------------------------------------------------------------------------------------------------------------------------------------------------------------------------------------------------------------------------------------------------------------------------------------------------------------------------------------------------------------------------------------------------------------------------------------------------------------------------------------------------------------------------------------------------------------------------------------------------------------------------------------------------------------------------------------------------------------------------------------------------------------------------------------------------------------------------------------------------------------------------------------------------------------------------------------------------------------------------------------------------------------------------------------------|

289

### 290 Fasting dietary counselling

291 The fasting group is closely monitored by nutritionists trained in fasting therapy, backed up by  
 292 physicians experienced in fasting, from the Charité – Universitätsmedizin Berlin and the Paracelsus-  
 293 Elena Clinic to ensure a uniform implementation of the fasting guidelines and the well-being of the  
 294 study participants. The monitoring consists of several in person and virtual meetings which held  
 295 individually or in group settings. Five meetings including the visits T0 and T2 during the fasting week  
 296 as well as a group meeting after PF to ensure a well-managed start to the TRE phase take place. Group  
 297 sessions are standardised using a pre-set deck of slides to be discussed during the group meetings  
 298 with only minor disease-related differences between the PD and RA groups. All longitudinal  
 299 participants receive a study-specific script with information on fasting procedures. Although the  
 300 adherence of the patients cannot be profoundly controlled in the ambulatory setting, the blood  
 301 samples will allow us to have additional insight into the nutritional habits as well as the fasting state  
 302 of the patients on the day of the visit (blood glucose levels).

303

## 304 Medication

305 The medical treatments of the patients are monitored and documented with every clinical visit. The  
 306 fasting intervention might necessitate temporary adjustments of several medications e.g., anti-  
 307 diabetic and anti-hypertensive drugs as insulin levels and hypertension will be reduced due to lack of  
 308 food intake [31].  
 309

## 310 Data collection

311 Sample and data collection is performed at the two clinical sites, Charité – Universitätsmedizin Berlin  
 312 and Paracelsus-Elena Clinic (Table 2).  
 313

314 *Table 2: Sampling procedures.*

### a) Biochemical samples and procedures

Blood (123 mL at T0, 23 mL at T2-T11)

Stool collection (2 mL at T0 and T3-T11)

Saliva collection (3.5 mL at T0-T11)

Midstream urine (50 mL at T0 -T11)

315

### b) Questionnaires

Disease specific

PD:

- Disease Activity Score (DAS-28) [52]
- Parkinson's Disease Sleep Scale-2 (PDSS-2) [53]
- Parkinson's Disease Questionnaire-39 (PDQ-39)[54]
- Simplified Disease Index Score (SDAI) [55]
- Funktionsfragebogen Hannover (FFbH-R) [56]
- Movement Disorder Society Unified PD Rating Scale (MDS-UPDRS)[57]
- Non-Motor Symptoms Questionnaire (NMSQ)[58]
- Non-Motor Symptoms Scale (NMSS)[59]

RA:

- Disease Activity Score (DAS-28) [55]

- 
- Non-Motor Symptoms Questionnaire (NMSQ) [58]
  - Funktionsfragebogen Hannover (FFbH-R) [56]

#### Dietary behaviour and lifestyle

- Fasting experience, expectation, and intervention
- Lifestyle
- 24H-Food-recall
- Food Frequency Questionnaire (FFQ)

#### General health and well-being

- Health Assessment Questionnaire (HAQ)[60]
  - Bristol Stool Scale[61]
  - Quality of Life questionnaire (WHO-5)[62]
  - Hospital Anxiety and Depression Scale (HADS)[63]
  - Profile of Mood States[64]
- 

316

317

### 318 Anthropometric data and questionnaires

319 The electronic data capture system REDCap[65], a secure web-based application, is used to record all  
320 individual specific data. All data is stored on a secure server infrastructure at the host institution in  
321 Luxembourg. Weight, height, body mass index (BMI), heart rate and blood pressure in sitting and  
322 standing position as well as waist-hip-ratio is determined at every visit. Dietary behaviour,  
323 sociodemographic measurements (age, sex, education level, employment status, marital status),  
324 family history, current and previous illness and co-morbidities, and current medications, as well as  
325 disease-specific data, questionnaires about the well-being of the patients and data on the behavioural  
326 factors are collected at baseline, T6 (week 3), T9 (month 6) and T11 (month 12) (Table 2).  
327 Questionnaires (24h-Food Recall, Bristol Stool Scale) are answered at all visits by the study  
328 participants. Data storage, analysis and exchange are done only in pseudonymised fashion. The  
329 nutritional data is analysed using the Nutrilog 3.20 software (Nutrilog SAS, Marans).

330

### 331 Blood samples and parameters

332 Blood samples are collected at each visit, and immediately used for peripheral blood mononuclear cell  
333 (PBMC) isolation (T0), analysis by the study laboratory and centrifugation to freeze plasma samples at  
334 -80°C (T0-T11). A clinical standard laboratory report is generated after every visit for each study  
335 participant (Table 3). In addition to routine blood parameters, anti-citrullinated protein antibody

336

337

338

339

340

341

342

343

344

336 (ACPA), zonulin, fatty-acid binding protein 2 (FABP2), and calprotectin levels are measured. Aliquots  
 337 are securely stored to account for novel observations and testing of hypotheses.

338

339 *Table 3: Routine blood parameters measured at each timepoint (T0 for cross-sectional study, T0-T11 for longitudinal study)*

| Haematology – EDTA-<br>blood | Clinical Chemistry –<br>Serum |
|------------------------------|-------------------------------|
| Basophils, %                 | Albumin                       |
| Basophils, abs.              | ALT, 37°C                     |
| Eosinophils, %               | Alkaline Phosphatase,<br>37°C |
| Eosinophils, abs.            | AST, 37°C                     |
| Erythrocytes                 | Bilirubin, total              |
| Haematocrit                  | Cholinesterase                |
| Haemoglobin                  | Cholesterol                   |
| HbA1c                        | Creatinine                    |
| Leucocytes                   | hs-CRP                        |
| Lymphocytes, %               | Glucose, serum                |
| Lymphocytes, abs.            | Gamma-GT, 37°C                |
| MCH                          | HDL-Cholesterol               |
| MCHC                         | LDL-Cholesterol               |
| MCV                          | Potassium                     |
| Monocytes, %                 | Sodium                        |
| Monocytes, abs.              | Total Protein                 |
| Neutrophils, %               | Triglycerides                 |
| Neutrophils, abs.            | Uric Acid                     |
| Platelets                    | Urea/BUN                      |
| RDW                          | <b>Proteins – Serum</b>       |
| Reticulocytes                | Rheumatoid factor H 35.9      |
| Reticulocytes                | <b>Hormones – Serum</b>       |
| Reticulocytes, abs.          | Insulin                       |
|                              | TSH (basal)                   |

340

### 341 Stool, urine and saliva samples

342 The samples listed in Table 2 are collected at each visit, except for stool samples on T2 (fasting week)  
 343 and immediately frozen and stored at -80°C. Stool characteristics are recorded at the time of the  
 344 sampling. Faecal samples represent the main sample type for resolving the dynamic processes driven  
 345 by microbiome in the gut. Also, as the gut microbiome is prone to diurnal fluctuations, the stool  
 346 samples are collected in the morning, as far as possible.

1  
2  
3 347

## 4 348 **Methods applied to samples**

5 349

### 6 349 7 8 350 **Biomolecular extractions**

9 351 The collected stool samples undergo a biomolecular extraction procedure to allow isolation of  
10 352 concomitant DNA, RNA, proteins, peptides and metabolites from single, unique faecal water samples;  
11 353 this process involves cryo-milling the samples in liquid nitrogen, disassociating metabolites from  
12 354 membrane and cell wall components in a solvent mixture of methanol, chloroform and water and  
13 355 lastly proteins and RNA extraction by a methanol/chloroform and phenol buffer [66, 67]. Faecal water  
14 356 is recovered following centrifugation and filtration, at low-speed or low-flow, respectively, to avoid  
15 357 cell lysis. Nucleic acids are preserved by the addition of ribonuclease inhibitors and isolated by silica-  
16 358 column-based techniques. This protocol involves the use of a robotic platform, ensuring a higher level  
17 359 of standardisation and reproducibility[2].  
18 359  
19 360

### 20 360 21 361 **Coupled metagenomic and metatranscriptomic analyses**

22 362 Prior to sequencing library preparation, internal standards are introduced to obtain quantitative  
23 363 sequencing data[68]. Contamination-free metagenomic (MG) and metatranscriptomic (MT) data is  
24 364 generated, processed and analysed using the Integrated Meta-omics Pipeline (IMP)[45], which  
25 365 incorporates pre-processing, assembly, gene annotation, mapping of reads, single nucleotide  
26 366 polymorphism calling, data normalisation as well as analyses of community structure and function in  
27 367 a fully reproducible software framework based on Docker. The MG and MT data is specifically  
28 368 screened for enrichments in genes and pathways with known immunogenic properties[69]. The  
29 369 extracellular biomolecules are linked to specific microbial populations based on the intracellular  
30 370 metagenomic data [70]. In addition, the sequencing data is mapped against genomes of food  
31 371 components[44]. The quantitative data is also related to microbial population sizes to determine the  
32 372 contribution of the resolved microbial populations in stool to the extracellular DNA and RNA  
33 373 complements[71].  
34 373  
35 374

### 36 374 37 375 **Metaproteomics**

38 375  
39 376 For the metaproteomic analyses, filtration is used to separate extracellular peptides from the obtained  
40 377 (poly)peptides. The resulting smaller fractions are then desalted and analysed without proteolytic  
41 378 digestion via liquid chromatography (LC) and mass spectrometry (MS) on an EasyNano-LC coupled  
42 379 online to a QExactive-Plus mass spectrometer (ThermoScientific, Waltham, USA). The identification of  
43 380 ribosomal peptides is done with an integrated catalogue of MG and MT data, while the non-ribosomal  
44 381 peptides are identified using different tools, i.e., MyriMatch, DirecTag as well as CycloBranch[45, 72,  
45 382 73]. The metaproteomic data also allows identification of extracellular (poly)peptides with possible  
46 383 pathogenic functions including protein misfolding and molecular mimicry[74, 75].  
47 383  
48 384

### 49 384 50 385 **Metabolomics**

51 386 Metabolomic data is analysed using a combination of targeted and untargeted approaches [44, 67,  
52 387 76]. This highlights the major metabolite classes produced by the gut microbiome with an effect on  
53 388 human physiology including organic acids, SCFA, lipids, branched-chain fatty acids, branched-chain  
54 389 amino acids, vitamins, bile acids and neurotransmitters. Besides external compound calibration series  
55 390 for quantification and quality control samples to ensure data normalisation and data acquisition  
56 391 quality assessment, the metabolite extraction fluid is fortified with multiple internal standards to  
57 392 improve method precision and accuracy[77, 78]. The data is compared to in-house databases and  
58 393 public mass spectral libraries to identify known metabolites. The metabolomic data complements the  
59 393  
60

394 metagenomic and metatranscriptomic data and thus allows further establishments of conclusive links  
395 to metabolic properties in the gut.

396

### 397 Deep immune profiling

398 Deep immune profiling is done using a recently established and optimised panel of metal-labelled  
399 antibodies together with cytometry coupled to mass spectrometry (MS), the Maxpar Direct Immune  
400 Profiling System (MDIPA). This approach allows the simultaneous quantification of 38 parameters on  
401 single cells. Whole blood is stained with the MDIPA kit and stabilised with Proteomic stabiliser Prot-1  
402 (501351694, Smart Tube Inc., Las Vegas) before storage at -80°C. The quantified immune cells  
403 included in the MDIPA panel are CD3+, CD4+, CD8+, monocytes, dendritic cells, granulocytes, MAIT, T  
404 cells, NK and B cells[79]. Cytokine expression profiles is analysed on blood plasma using the Human  
405 Luminex performance Cytokine Panel (R&D Systems Europe, Abingdon), measuring CCL3, CCL4, CCL5,  
406 GM-CSF, IL-1 $\beta$ , IL-2, IL-4, IL-5, IL-6, IL-8, IL-10, IL-12p70, IL-13, IL-15, IL-18, IL-21, IL-27, IL-33, IFN- $\beta$ ,  
407 Galectin-1, IFN- $\gamma$  and TNF- $\alpha$  [69].

408

### 409 Gut-on-a-chip models

410 PBMCs isolated from T0 blood samples are co-cultured with gut-derived microbes under  
411 physiologically representative conditions using the gut-on-a-chip model HuMiX[80]. This model of the  
412 human gastrointestinal interface allows the investigation of the interactions between immune,  
413 epithelial and bacterial cells and specifically the response to fasting in personalised in vitro models.

414

### 415 The Expobiome Map

416 The Expobiome Map (<https://expobiome.lcsb.uni.lu>) illustrates the diverse complex of microbial  
417 immunogenic molecules, including nucleic acids, (poly)peptides, structural molecules, and  
418 metabolites. The interactions between this “expobiome” and human immune pathways are encoded  
419 in the context of chronic diseases[1]. The ExpoBiome Map is visualised using the MINERVA  
420 Platform[81]. Clicking on different elements on the map reveals factors they affect and are affected  
421 by, allowing an easier navigation through the complex relationships between individual microbiome  
422 components in relation to human disease. The multi-omics data generated in the present study will  
423 be integrated with the Map.

424

### 425 Exploratory analysis of novel host-microbiome interactions

426 Unknown non-ribosomal peptides or metabolite features are associated through correlation with  
427 transcripts, proteins, and metabolites. Extracellular DNA fragments, as well as transcripts, proteins  
428 and ribosomal peptides are linked to their genomic context by using IMP[45]. The data generated by  
429 the project will be connected and collated to existing, publicly available datasets.

430

### 431 Outcome parameters

#### 432 Primary Outcome

433 The primary endpoint of the study is the characterisation of the gut microbiome. The evaluation  
434 includes both between-group and within-group differences in the longitudinal study arms with the  
435 fasting intervention.

436

#### 437 Secondary Outcome Measures

438 Secondary outcomes include the identification of common and disease-specific molecular signatures  
439 and the characterisation of microbiome-derived effector molecules impacting the innate and adaptive

1  
2  
3 440 immune pathways. Furthermore, several additional parameters mentioned in *Anthropometric data*  
4 441 *and questionnaires* are assessed over a period of 12 months.  
5 442

### 7 443 **Sample size and power calculation**

8 444 A power calculation using pilot metatranscriptomic data based on faecal extracellular RNA samples  
9 445 was performed to determine the number of subjects to be recruited for the ExpoBiome project. The  
10 446 obtained relative abundances of genera were used for the calculation of the required sample size per  
11 447 group. The power calculation was based on the algorithm as described by Tusher, Tibshirani, and  
12 448 Chu[82]. To achieve a power of 90% (at  $\alpha = 0.05$ ), a total of 50 individuals per group (RA, PD, healthy  
13 449 controls) must be analysed. Considering any possible dropouts, 20% additional subjects are recruited,  
14 450 resulting in a total number of 180 individuals, i.e., 60 per group. For the longitudinal part, a subset of  
15 451 60 adult individuals (30 patients with Parkinson's disease and 30 patients with rheumatoid arthritis)  
16 452 are selected, based on their ability and willingness to participate in the longitudinal part of the study  
17 453 (12 months follow-up). The selected number of participants for the longitudinal study is based on  
18 454 feasibility due to the complexity and high costs of the clinical trial. The total number of subjects in the  
19 455 longitudinal study can be smaller, as each individual serves as their own control.  
20 456

### 23 457 **Adverse events**

24 458 There are no major risks expected for participants. Minor common adverse effects of PF might include  
25 459 headaches, nausea, insomnia, back pain, dyspepsia and fatigue[83]. Any occurring adverse events are  
26 460 recorded at each visit in REDCap[65]. Serious adverse events are communicated to the study  
27 461 coordinator and principal investigator within 24 h of their report.  
28 462

### 31 463 **Data management, monitoring, analysis, and evaluation of data**

32 464 The study participants receive a study ID (pseudonym) which is used for all collected data. Self-  
33 465 administered questionnaires are directly recorded in REDCap. Participant files are kept for at least 10  
34 466 years at the respective clinical sites.

35 467 Weekly meetings between the study team, the different clinical partners, and the principal  
36 468 investigator, ensure a close monitoring of the data. Any occurring adverse events or other issues are  
37 469 thus handled immediately.

38 470 Different statistical tests are performed according to the nature of the data. A premature termination  
39 471 of the study is not envisaged; therefore, no interim analysis is done. Different correlation measures  
40 472 are applied, including Spearman correlation, mutual information on discretised data, distance  
41 473 correlation, maximum information criterion, local similarity analysis and the bioenv approach.  
42 474 Comparison across all omic levels allows identification of common and disease-specific signatures.  
43 475 Multivariate machine learning is used to link different data features to observed patterns. For  
44 476 additional confounding factors, especially in the cross-sectional study, multivariate statistical analysis  
45 477 will be performed. These factors will be accounted for by including confounders in the analysis, e.g.,  
46 478 as covariate in the statistical models.

47 479 The longitudinal part of the study continues for a period of 12 months. After finalisation of this period,  
48 480 there is no follow-up of the participants. Interesting findings will be further validated using the existing  
49 481 sample set and analyses may be performed on additionally collected samples.

50 482 The SPIRIT - checklist (Standard Protocol Items: Recommendations for Interventional Trials) was used  
51 483 to write this protocol [84].  
52  
53  
54  
55  
56  
57  
58  
59  
60



## 484 Trial status

485 The recruitment for the ExpoBiome study started in April 2021 and is currently ongoing. All study  
486 participants should be recruited by the end of 2022. The sample collection will take place from April  
487 2021 to November 2023.  
488

## 489 Acknowledgements

490 We thank Dr. Catharina Delebinski, Melanie Dell’Oro, Grit Langhans, Ursula Reuß, Maik Schröder and  
491 Nadine Sylvester for their support during the study.  
492

## 493 Author contributions:

494 Study design and protocol were done by Bérénice Hansen, Cédric C. Laczny, Jochen G. Schneider,  
495 Paul Wilmes; the interventional concept was drawn by Etienne Hanslian, Daniela Liebscher, Andreas  
496 Michalsen, Anika Hartmann, Brit Mollenhauer, Sebastian Schade, Nico Steckhan, Jochen G.  
497 Schneider, Paul Wilmes; the clinical trial was designed and is conducted by Etienne Hanslian, Daniela  
498 Liebscher, Andreas Michalsen, Anika Hartmann, Brit Mollenhauer, Sebastian Schade; the procured  
499 funding was provided by Paul Wilmes; the planning of high-throughput applications, statistical  
500 planning, sample size calculation and randomisation were defined by Cédric C. Laczny, Jochen G.  
501 Schneider, Paul Wilmes, Kirsten Roomp; the initial draft of the manuscript and coordination of the  
502 editing process were performed by Bérénice Hansen; the protocol preparation has been done by  
503 Bérénice Hansen, Audrey Frachet-Bour, Janine Habier; the planning of the data analysis was done by  
504 Cédric C. Laczny, Jochen G. Schneider, Paul Wilmes, Kirsten Roomp, Velma T.E. Aho, Marek  
505 Ostaszewski; all authors contributed equally with edits, comments and feedback, read and approved  
506 the final manuscript.  
507

## 508 Ethics and dissemination

509 Ethical approval was obtained to plan and conduct the trial from the institutional review board of the  
510 Charité-Universitätsmedizin Berlin (EA1/204/19), the ethics committee of the state medical  
511 association (Landesärztekammer) of Hessen (2021-2230-zvBO) and the Ethics Review Panel (ERP) of  
512 the University of Luxembourg (ERP 21-001-A ExpoBiome). The results of this study will be  
513 disseminated through peer-reviewed publications, scientific presentations, as well as press releases  
514 and social media postings (Twitter, LinkedIn). Study participants will be contacted and informed by  
515 the respective clinical sites about the outcome and results of the study, once the data analysis has  
516 been completed (dissemination phase).  
517  
518

519 **Funding statement:** This project has received funding from the European Research  
520 Council (ERC) under the European Union’s Horizon 2020 research and innovation program (grant  
521 agreement No. 863664).  
522

## 522 Competing interests statement

523 None declared.  
524  
525  
526  
527  
528  
529  
530

## Supplements

The SPIRIT checklist was used to write our report[84].

## References

1. Wilmes, P., et al., *The gut microbiome molecular complex in human health and disease*. Cell Host Microbe, 2022. **30**(9): p. 1201-1206.
2. De Saedeleer, B., et al., *Systematic characterization of human gut microbiome-secreted molecules by integrated multi-omics*. ISME Communications, 2021. **1**(1): p. 82.
3. Greenhalgh, K., et al., *The human gut microbiome in health: establishment and resilience of microbiota over a lifetime*. Environ Microbiol, 2016. **18**(7): p. 2103-16.
4. Hall, A.B., A.C. Tolonen, and R.J. Xavier, *Human genetic variation and the gut microbiome in disease*. Nature Reviews Genetics, 2017. **18**(11): p. 690-699.
5. Baldini, F., et al., *Parkinson's disease-associated alterations of the gut microbiome predict disease-relevant changes in metabolic functions*. BMC Biol, 2020. **18**(1): p. 62.
6. Yoo, J.Y., et al., *Gut Microbiota and Immune System Interactions*. Microorganisms, 2020. **8**(10).
7. Sonnenburg, J.L. and F. Bäckhed, *Diet–microbiota interactions as moderators of human metabolism*. Nature, 2016. **535**(7610): p. 56-64.
8. Zmora, N., J. Suez, and E. Elinav, *You are what you eat: diet, health and the gut microbiota*. Nat Rev Gastroenterol Hepatol, 2019. **16**(1): p. 35-56.
9. Guo, Q., et al., *Rheumatoid arthritis: pathological mechanisms and modern pharmacologic therapies*. Bone Res, 2018. **6**: p. 15.
10. Healthline, V.L. *Rheumatoid Arthritis by the Numbers: Facts, Statistics, and You*. 2021.
11. Scherer, H.U., T. Häupl, and G.R. Burmester, *The etiology of rheumatoid arthritis*. Journal of Autoimmunity, 2020. **110**: p. 102400.
12. Bodkhe, R., B. Balakrishnan, and V. Taneja, *The role of microbiome in rheumatoid arthritis treatment*. Ther Adv Musculoskelet Dis, 2019. **11**: p. 1759720x19844632.
13. Chen, J., et al., *An expansion of rare lineage intestinal microbes characterizes rheumatoid arthritis*. Genome Medicine, 2016. **8**(1): p. 43.
14. Kitamura, K., et al., *Oral and Intestinal Bacterial Substances Associated with Disease Activities in Patients with Rheumatoid Arthritis: A Cross-Sectional Clinical Study*. J Immunol Res, 2022. **2022**: p. 6839356.
15. Wu, H.J., et al., *Gut-residing segmented filamentous bacteria drive autoimmune arthritis via T helper 17 cells*. Immunity, 2010. **32**(6): p. 815-27.
16. Scher, J.U., et al., *Expansion of intestinal Prevotella copri correlates with enhanced susceptibility to arthritis*. eLife, 2013. **2**: p. e01202.
17. Zhang, X., et al., *The oral and gut microbiomes are perturbed in rheumatoid arthritis and partly normalized after treatment*. Nature Medicine, 2015. **21**(8): p. 895-905.
18. Lubomski, M., et al., *Parkinson's disease and the gastrointestinal microbiome*. J Neurol, 2020. **267**(9): p. 2507-2523.
19. Opara, J., et al., *Motor assessment in Parkinson`s disease*. Ann Agric Environ Med, 2017. **24**(3): p. 411-415.

- 1  
2  
3 568 20. Tysnes, O.B. and A. Storstein, *Epidemiology of Parkinson's disease*. J Neural Transm (Vienna), 2017. **124**(8): p. 901-905.
- 4 569  
5 570 21. Garcia, P., et al., *Neurodegeneration and neuroinflammation are linked, but independent of alpha-synuclein inclusions, in a seeding/spreading mouse model of Parkinson's disease*. *Glia*, 2022. **70**(5): p. 935-960.
- 6 571  
7 572  
8 573 22. Heintz-Buschart, A. and P. Wilmes, *Human Gut Microbiome: Function Matters*. *Trends Microbiol*, 2018. **26**(7): p. 563-574.
- 9 574  
10 575 23. Romano, S., et al., *Meta-analysis of the Parkinson's disease gut microbiome suggests alterations linked to intestinal inflammation*. *npj Parkinson's Disease*, 2021. **7**(1): p. 27.
- 11 576  
12 577  
13 578 24. Becker, A., et al., *Effects of Resistant Starch on Symptoms, Fecal Markers, and Gut Microbiota in Parkinson's Disease - The RESISTA-PD Trial*. *Genomics Proteomics Bioinformatics*, 2022. **20**(2): p. 274-287.
- 14 579  
15 580  
16 581 25. Hall, D.A., et al., *An open label, non-randomized study assessing a prebiotic fiber intervention in a small cohort of Parkinson's disease participants*. *Nat Commun*, 2023. **14**(1): p. 926.
- 17 582  
18 583  
19 584 26. Mertsalmi, T.H., et al., *More than constipation - bowel symptoms in Parkinson's disease and their connection to gut microbiota*. *European journal of neurology*, 2017. **24**(11): p. 1375-1383.
- 20 585  
21 586  
22 587 27. Dogra, N., R.J. Mani, and D.P. Katare, *The Gut-Brain Axis: Two Ways Signaling in Parkinson's Disease*. *Cell Mol Neurobiol*, 2022. **42**(2): p. 315-332.
- 23 588  
24 589 28. Forsyth, C.B., et al., *Increased intestinal permeability correlates with sigmoid mucosa alpha-synuclein staining and endotoxin exposure markers in early Parkinson's disease*. *PLoS One*, 2011. **6**(12): p. e28032.
- 25 590  
26 591  
27 592 29. Devos, D., et al., *Colonic inflammation in Parkinson's disease*. *Neurobiol Dis*, 2013. **50**: p. 42-8.
- 28 593  
29 594 30. Britannica, *The Editors of Encyclopaedia*. "fasting". *Encyclopedia Britannica*, Accessed 3 October 2022. <https://www.britannica.com/topic/fasting>.
- 30 595  
31 596 31. Hartmann, A.M., et al., *Efficacy of therapeutic fasting and plant-based diet in patients with rheumatoid arthritis (NutriFast): study protocol for a randomised controlled clinical trial*. *BMJ Open*, 2021. **11**(8): p. e047758.
- 32 597  
33 598  
34 599 32. Michalsen, A., *Prolonged fasting as a method of mood enhancement in chronic pain syndromes: a review of clinical evidence and mechanisms*. *Curr Pain Headache Rep*, 2010. **14**(2): p. 80-7.
- 35 600  
36 601  
37 602 33. Vargas-Molina, S., et al., *Effects of a low-carbohydrate ketogenic diet on health parameters in resistance-trained women*. *Eur J Appl Physiol*, 2021. **121**(8): p. 2349-2359.
- 38 603  
39 604  
40 605 34. Mattison, J.A., et al., *Caloric restriction improves health and survival of rhesus monkeys*. *Nature Communications*, 2017. **8**(1): p. 14063.
- 41 606  
42 607 35. Maifeld, A., et al., *Fasting alters the gut microbiome reducing blood pressure and body weight in metabolic syndrome patients*. *Nature Communications*, 2021. **12**(1): p. 1970.
- 43 608  
44 609  
45 610 36. Choi, I.Y., et al., *A Diet Mimicking Fasting Promotes Regeneration and Reduces Autoimmunity and Multiple Sclerosis Symptoms*. *Cell Rep*, 2016. **15**(10): p. 2136-2146.
- 46 611  
47 612  
48 613 37. Jordan, S., et al., *Dietary Intake Regulates the Circulating Inflammatory Monocyte Pool*. *Cell*, 2019. **178**(5): p. 1102-1114.e17.
- 49 614  
50  
51  
52  
53  
54  
55  
56  
57  
58  
59  
60

- 1  
2  
3 615 38. Neth, B.J., et al., *The Role of Intermittent Fasting in Parkinson's Disease*. Front  
4 616 Neurol, 2021. **12**: p. 682184.
- 5 617 39. Cignarella, F., et al., *Intermittent Fasting Confers Protection in CNS Autoimmunity by*  
6 618 *Altering the Gut Microbiota*. Cell Metab, 2018. **27**(6): p. 1222-1235.e6.
- 7 619 40. Mesnage, R., et al., *Changes in human gut microbiota composition are linked to the*  
8 620 *energy metabolic switch during 10 d of Buchinger fasting*. J Nutr Sci, 2019. **8**: p. e36.
- 9 621 41. Magne, F., et al., *The Firmicutes/Bacteroidetes Ratio: A Relevant Marker of Gut*  
10 622 *Dysbiosis in Obese Patients?* Nutrients, 2020. **12**(5).
- 11 623 42. Purchiaroni, F., et al., *The role of intestinal microbiota and the immune system*. Eur  
12 624 Rev Med Pharmacol Sci, 2013. **17**(3): p. 323-33.
- 13 625 43. Leeming, E.R., et al., *Effect of Diet on the Gut Microbiota: Rethinking Intervention*  
14 626 *Duration*. Nutrients, 2019. **11**(12): p. 2862.
- 15 627 44. Heintz-Buschart, A., et al., *Integrated multi-omics of the human gut microbiome in a*  
16 628 *case study of familial type 1 diabetes*. Nature Microbiology, 2016. **2**(1): p. 16180.
- 17 629 45. Narayanasamy, S., et al., *IMP: a pipeline for reproducible reference-independent*  
18 630 *integrated metagenomic and metatranscriptomic analyses*. Genome Biology, 2016.  
19 631 **17**(1): p. 260.
- 20 632 46. Wilmes, P., A. Heintz-Buschart, and P.L. Bond, *A decade of metaproteomics: where*  
21 633 *we stand and what the future holds*. Proteomics, 2015. **15**(20): p. 3409-17.
- 22 634 47. Gabel, K., et al., *Effects of 8-hour time restricted feeding on body weight and*  
23 635 *metabolic disease risk factors in obese adults: A pilot study*. Nutr Healthy Aging,  
24 636 2018. **4**(4): p. 345-353.
- 25 637 48. Hughes, A.J., et al., *A clinicopathologic study of 100 cases of Parkinson's disease*. Arch  
26 638 Neurol, 1993. **50**(2): p. 140-8.
- 27 639 49. Hoehn, M.M. and M.D. Yahr, *Parkinsonism. onset, progression, and mortality*, 1967.  
28 640 **17**(5): p. 427-427.
- 29 641 50. Kay, J. and K.S. Upchurch, *ACR/EULAR 2010 rheumatoid arthritis classification*  
30 642 *criteria*. Rheumatology (Oxford), 2012. **51** Suppl 6: p. vi5-9.
- 31 643 51. Feng, X., et al., *Body Mass Index and the Risk of Rheumatoid Arthritis: An Updated*  
32 644 *Dose-Response Meta-Analysis*. Biomed Res Int, 2019. **2019**: p. 3579081.
- 33 645 52. Wells G, B.J., Teng J, et al, *Validation of the 28-joint Disease Activity Score (DAS28)*  
34 646 *and European League Against Rheumatism response criteria based on C-reactive*  
35 647 *protein against disease progression in patients with rheumatoid arthritis, and*  
36 648 *comparison with the DAS28 based on erythrocyte sedimentation rate*. Annals of the  
37 649 Rheumatic Diseases 2009. **68**: p. 954-960.
- 38 650 53. Trenkwalder, C., et al., *Parkinson's disease sleep scale--validation of the revised*  
39 651 *version PDSS-2*. Mov Disord, 2011. **26**(4): p. 644-52.
- 40 652 54. Bushnell, D.M. and M.L. Martin, *Quality of life and Parkinson's disease: translation*  
41 653 *and validation of the US Parkinson's Disease Questionnaire (PDQ-39)*. Qual Life Res,  
42 654 1999. **8**(4): p. 345-50.
- 43 655 55. Smolen, J.S., et al., *A simplified disease activity index for rheumatoid arthritis for use*  
44 656 *in clinical practice*. Rheumatology (Oxford), 2003. **42**(2): p. 244-57.
- 45 657 56. Raspe, H.H., Hagedorn, U., Kohlmann, T., & Mattussek, S., *Der Funktionsfragebogen*  
46 658 *Hannover (FFbH): Ein Instrument zur Funktionsdiagnostik bei polyartikulären*  
47 659 *Gelenkerkrankungen, in Ergebnisse sozialwissenschaftlicher Evaluation eines*  
48 660 *Modellversuchs (pp. 164-182)*. 1990, Schattauer Verlag.

- 1  
2  
3 661 57. Goetz, C.G., et al., *Movement Disorder Society-sponsored revision of the Unified*  
4 662 *Parkinson's Disease Rating Scale (MDS-UPDRS): Process, format, and clinimetric*  
5 663 *testing plan*. *Mov Disord*, 2007. **22**(1): p. 41-7.
- 7 664 58. Chaudhuri, K.R., et al., *International multicenter pilot study of the first*  
8 665 *comprehensive self-completed nonmotor symptoms questionnaire for Parkinson's*  
9 666 *disease: the NMSQuest study*. *Mov Disord*, 2006. **21**(7): p. 916-23.
- 11 667 59. Chaudhuri, K.R., et al., *The metric properties of a novel non-motor symptoms scale*  
12 668 *for Parkinson's disease: Results from an international pilot study*. *Mov Disord*, 2007.  
13 669 **22**(13): p. 1901-11.
- 14 670 60. Wolfe, F., *A brief clinical health assessment instrument clinhaq*. *Arthritis and*  
15 671 *Rheumatism*, 1989. **32**(4 Suppl): p. S99-S99.
- 17 672 61. Lewis, S.J. and K.W. Heaton, *Stool form scale as a useful guide to intestinal transit*  
18 673 *time*. *Scand J Gastroenterol*, 1997. **32**(9): p. 920-4.
- 19 674 62. Topp, C.W., et al., *The WHO-5 Well-Being Index: a systematic review of the literature*.  
20 675 *Psychother Psychosom*, 2015. **84**(3): p. 167-76.
- 22 676 63. Zigmond, A.S. and R.P. Snaith, *The hospital anxiety and depression scale*. *Acta*  
23 677 *Psychiatr Scand*, 1983. **67**(6): p. 361-70.
- 24 678 64. McNair DM, L.M., Droppleman LF, *Edits Manual for the Profile of Mood States*  
25 679 *(Poms)*. Rev ed. . San Diego: Educational and Industrial Testing Service, 1992.
- 27 680 65. Harris, P.A., et al., *Research electronic data capture (REDCap)--a metadata-driven*  
28 681 *methodology and workflow process for providing translational research informatics*  
29 682 *support*. *J Biomed Inform*, 2009. **42**(2): p. 377-81.
- 30 683 66. Wilmes, P., Roume, H., Hiller, K. & Cordes, T., *Method and kit for the isolation of*  
31 684 *genomic DNA, RNA, proteins and metabolites from a single biological sample.*, in  
32 685 *World Intellectual Property Organization, C.D.R.P.-G.L. Université Du Luxembourg,*  
33 686 *Editor. 2014: Switzerland.*
- 35 687 67. Roume, H., et al., *A biomolecular isolation framework for eco-systems biology*. *The*  
36 688 *ISME Journal*, 2013. **7**(1): p. 110-121.
- 37 689 68. Locati, M.D., et al., *Improving small RNA-seq by using a synthetic spike-in set for size-*  
38 690 *range quality control together with a set for data normalization*. *Nucleic Acids Res*,  
39 691 2015. **43**(14): p. e89.
- 41 692 69. Wampach, L., et al., *Birth mode is associated with earliest strain-conferred gut*  
42 693 *microbiome functions and immunostimulatory potential*. *Nature Communications*,  
43 694 2018. **9**(1): p. 5091.
- 45 695 70. Albanese, D. and C. Donati, *Strain profiling and epidemiology of bacterial species*  
46 696 *from metagenomic sequencing*. *Nature Communications*, 2017. **8**(1): p. 2260.
- 47 697 71. Vandeputte, D., et al., *Quantitative microbiome profiling links gut community*  
48 698 *variation to microbial load*. *Nature*, 2017. **551**(7681): p. 507-511.
- 49 699 72. Tang, H., S. Li, and Y. Ye, *A Graph-Centric Approach for Metagenome-Guided Peptide*  
50 700 *and Protein Identification in Metaproteomics*. *PLoS Comput Biol*, 2016. **12**(12): p.  
51 701 e1005224.
- 53 702 73. Tabb, D.L., C.G. Fernando, and M.C. Chambers, *MyriMatch: highly accurate tandem*  
54 703 *mass spectral peptide identification by multivariate hypergeometric analysis*. *J*  
55 704 *Proteome Res*, 2007. **6**(2): p. 654-61.
- 57 705 74. Heintz-Buschart, A., et al., *The nasal and gut microbiome in Parkinson's disease and*  
58 706 *idiopathic rapid eye movement sleep behavior disorder*. *Mov Disord*, 2018. **33**(1): p.  
59 707 88-98.

- 1  
2  
3 708 75. Chen, S.G., et al., *Exposure to the Functional Bacterial Amyloid Protein Curli Enhances*  
4 709 *Alpha-Synuclein Aggregation in Aged Fischer 344 Rats and Caenorhabditis elegans.*  
5 710 *Scientific Reports*, 2016. **6**(1): p. 34477.  
6 711 76. Wilmes, P., et al., *Metabolome-proteome differentiation coupled to microbial*  
7 712 *divergence.* *mBio*, 2010. **1**(5).  
8 713 77. Kim, D.H., et al., *LC-MS-based absolute metabolite quantification: application to*  
9 714 *metabolic flux measurement in trypanosomes.* *Metabolomics*, 2015. **11**(6): p. 1721-  
10 715 1732.  
11 716 78. Lei, Z., D.V. Huhman, and L.W. Sumner, *Mass spectrometry strategies in*  
12 717 *metabolomics.* *J Biol Chem*, 2011. **286**(29): p. 25435-42.  
13 718 79. *Immunophenotyping assessment in a COVID-19 cohort (IMPACC): A prospective*  
14 719 *longitudinal study.* *Sci Immunol*, 2021. **6**(62).  
15 720 80. Shah, P., et al., *A microfluidics-based in vitro model of the gastrointestinal human-*  
16 721 *microbe interface.* *Nature Communications*, 2016. **7**(1): p. 11535.  
17 722 81. Aho, V.T.E., et al., *SnapShot: The Expobiome Map.* *Cell Host Microbe*, 2022. **30**(9): p.  
18 723 1340-1340.e1.  
19 724 82. Tusher, V.G., R. Tibshirani, and G. Chu, *Significance analysis of microarrays applied to*  
20 725 *the ionizing radiation response.* *Proc Natl Acad Sci U S A*, 2001. **98**(9): p. 5116-21.  
21 726 83. Finnell, J.S., et al., *Is fasting safe? A chart review of adverse events during medically*  
22 727 *supervised, water-only fasting.* *BMC Complementary and Alternative Medicine*,  
23 728 2018. **18**(1): p. 67.  
24 729 84. Chan, A.-W., et al., *SPIRIT 2013 explanation and elaboration: guidance for protocols*  
25 730 *of clinical trials.* *BMJ : British Medical Journal*, 2013. **346**: p. e7586.  
26 731

## 732 Figure Legends

733 Figure 1. Study design. This figure illustrates the study design with five different arms in  
734 total, two of which continue with the longitudinal part of the study. Visits take place at the  
735 clinical sites at each timepoint and include the collection of the displayed samples. This  
736 image was generated using Biorender software (<http://www.biorender.com>). T, timepoint;  
737 W, week; D, day; M, month.

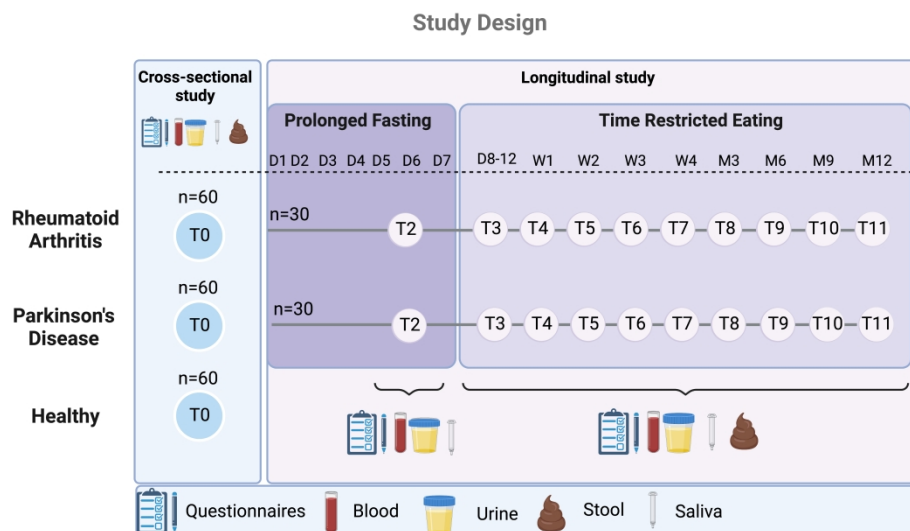

Figure 1. Study design. This figure illustrates the study design with five different arms in total, two of which continue with the longitudinal part of the study. Visits take place at the clinical sites at each timepoint and include the collection of the displayed samples. This image was generated using Biorender software (<http://www.biorender.com>). T, timepoint; W, week; D, day; M, month.

279x177mm (600 x 600 DPI)

# Reporting checklist for protocol of a clinical trial.

Based on the SPIRIT guidelines.

## Instructions to authors

Complete this checklist by entering the page numbers from your manuscript where readers will find each of the items listed below.

Your article may not currently address all the items on the checklist. Please modify your text to include the missing information. If you are certain that an item does not apply, please write "n/a" and provide a short explanation.

Upload your completed checklist as an extra file when you submit to a journal.

In your methods section, say that you used the SPIRIT reporting guidelines, and cite them as:

Chan A-W, Tetzlaff JM, Gøtzsche PC, Altman DG, Mann H, Berlin J, Dickersin K, Hróbjartsson A, Schulz KF, Parulekar WR, Krleža-Jerić K, Laupacis A, Moher D. SPIRIT 2013 Explanation and Elaboration: Guidance for protocols of clinical trials. *BMJ*. 2013;346:e7586

|                                             |                     | Reporting Item                                                                                               | Page Number |
|---------------------------------------------|---------------------|--------------------------------------------------------------------------------------------------------------|-------------|
| <b>Administrative information</b>           |                     |                                                                                                              |             |
| Title                                       | <a href="#">#1</a>  | Descriptive title identifying the study design, population, interventions, and, if applicable, trial acronym | 1           |
| Trial registration                          | <a href="#">#2a</a> | Trial identifier and registry name. If not yet registered, name of intended registry                         | 2           |
| Trial registration: data set                | <a href="#">#2b</a> | All items from the World Health Organization Trial Registration Data Set                                     | n/a         |
| Protocol version                            | <a href="#">#3</a>  | Date and version identifier                                                                                  | n/a         |
| Funding                                     | <a href="#">#4</a>  | Sources and types of financial, material, and other support                                                  | 13          |
| Roles and responsibilities: contributorship | <a href="#">#5a</a> | Names, affiliations, and roles of protocol contributors                                                      | 1           |



|    |                           |                     |                                                                    |       |
|----|---------------------------|---------------------|--------------------------------------------------------------------|-------|
| 1  | Roles and                 | <a href="#">#5b</a> | Name and contact information for the trial sponsor                 | 1     |
| 2  | responsibilities:         |                     |                                                                    |       |
| 3  | sponsor contact           |                     |                                                                    |       |
| 4  | information               |                     |                                                                    |       |
| 5  |                           |                     |                                                                    |       |
| 6  |                           |                     |                                                                    |       |
| 7  |                           |                     |                                                                    |       |
| 8  | Roles and                 | <a href="#">#5c</a> | Role of study sponsor and funders, if any, in study design;        | 1, 13 |
| 9  | responsibilities:         |                     | collection, management, analysis, and interpretation of data;      |       |
| 10 | sponsor and funder        |                     | writing of the report; and the decision to submit the report for   |       |
| 11 |                           |                     | publication, including whether they will have ultimate authority   |       |
| 12 |                           |                     | over any of these activities                                       |       |
| 13 |                           |                     |                                                                    |       |
| 14 |                           |                     |                                                                    |       |
| 15 |                           |                     |                                                                    |       |
| 16 | Roles and                 | <a href="#">#5d</a> | Composition, roles, and responsibilities of the coordinating       | 1, 13 |
| 17 | responsibilities:         |                     | centre, steering committee, endpoint adjudication committee,       |       |
| 18 | committees                |                     | data management team, and other individuals or groups              |       |
| 19 |                           |                     | overseeing the trial, if applicable (see Item 21a for data         |       |
| 20 |                           |                     | monitoring committee)                                              |       |
| 21 |                           |                     |                                                                    |       |
| 22 |                           |                     |                                                                    |       |
| 23 |                           |                     |                                                                    |       |
| 24 | <b>Introduction</b>       |                     |                                                                    |       |
| 25 |                           |                     |                                                                    |       |
| 26 |                           |                     |                                                                    |       |
| 27 | Background and            | <a href="#">#6a</a> | Description of research question and justification for undertaking | 5     |
| 28 | rationale                 |                     | the trial, including summary of relevant studies (published and    |       |
| 29 |                           |                     | unpublished) examining benefits and harms for each intervention    |       |
| 30 |                           |                     |                                                                    |       |
| 31 |                           |                     |                                                                    |       |
| 32 | Background and            | <a href="#">#6b</a> | Explanation for choice of comparators                              | 5     |
| 33 | rationale: choice of      |                     |                                                                    |       |
| 34 | comparators               |                     |                                                                    |       |
| 35 |                           |                     |                                                                    |       |
| 36 |                           |                     |                                                                    |       |
| 37 | Objectives                | <a href="#">#7</a>  | Specific objectives or hypotheses                                  | 5     |
| 38 |                           |                     |                                                                    |       |
| 39 |                           |                     |                                                                    |       |
| 40 | Trial design              | <a href="#">#8</a>  | Description of trial design including type of trial (eg, parallel  | 5     |
| 41 |                           |                     | group, crossover, factorial, single group), allocation ratio, and  |       |
| 42 |                           |                     | framework (eg, superiority, equivalence, non-inferiority,          |       |
| 43 |                           |                     | exploratory)                                                       |       |
| 44 |                           |                     |                                                                    |       |
| 45 |                           |                     |                                                                    |       |
| 46 | <b>Methods:</b>           |                     |                                                                    |       |
| 47 | <b>Participants,</b>      |                     |                                                                    |       |
| 48 | <b>interventions, and</b> |                     |                                                                    |       |
| 49 | <b>outcomes</b>           |                     |                                                                    |       |
| 50 |                           |                     |                                                                    |       |
| 51 |                           |                     |                                                                    |       |
| 52 |                           |                     |                                                                    |       |
| 53 | Study setting             | <a href="#">#9</a>  | Description of study settings (eg, community clinic, academic      | 6     |
| 54 |                           |                     | hospital) and list of countries where data will be collected.      |       |
| 55 |                           |                     | Reference to where list of study sites can be obtained             |       |
| 56 |                           |                     |                                                                    |       |
| 57 |                           |                     |                                                                    |       |
| 58 |                           |                     |                                                                    |       |
| 59 |                           |                     |                                                                    |       |
| 60 |                           |                     |                                                                    |       |

|    |                              |                      |                                                                                                                                                                                                                                                                                                                                                                                |     |
|----|------------------------------|----------------------|--------------------------------------------------------------------------------------------------------------------------------------------------------------------------------------------------------------------------------------------------------------------------------------------------------------------------------------------------------------------------------|-----|
| 1  | Eligibility criteria         | <a href="#">#10</a>  | Inclusion and exclusion criteria for participants. If applicable, eligibility criteria for study centres and individuals who will perform the interventions (eg, surgeons, psychotherapists)                                                                                                                                                                                   | 6   |
| 2  |                              |                      |                                                                                                                                                                                                                                                                                                                                                                                |     |
| 3  |                              |                      |                                                                                                                                                                                                                                                                                                                                                                                |     |
| 4  |                              |                      |                                                                                                                                                                                                                                                                                                                                                                                |     |
| 5  |                              |                      |                                                                                                                                                                                                                                                                                                                                                                                |     |
| 6  | Interventions:               | <a href="#">#11a</a> | Interventions for each group with sufficient detail to allow replication, including how and when they will be administered                                                                                                                                                                                                                                                     | 5,7 |
| 7  | description                  |                      |                                                                                                                                                                                                                                                                                                                                                                                |     |
| 8  |                              |                      |                                                                                                                                                                                                                                                                                                                                                                                |     |
| 9  |                              |                      |                                                                                                                                                                                                                                                                                                                                                                                |     |
| 10 | Interventions:               | <a href="#">#11b</a> | Criteria for discontinuing or modifying allocated interventions for a given trial participant (eg, drug dose change in response to harms, participant request, or improving / worsening disease)                                                                                                                                                                               | 5,7 |
| 11 | modifications                |                      |                                                                                                                                                                                                                                                                                                                                                                                |     |
| 12 |                              |                      |                                                                                                                                                                                                                                                                                                                                                                                |     |
| 13 |                              |                      |                                                                                                                                                                                                                                                                                                                                                                                |     |
| 14 |                              |                      |                                                                                                                                                                                                                                                                                                                                                                                |     |
| 15 | Interventions:               | <a href="#">#11c</a> | Strategies to improve adherence to intervention protocols, and any procedures for monitoring adherence (eg, drug tablet return; laboratory tests)                                                                                                                                                                                                                              | 7   |
| 16 | adherence                    |                      |                                                                                                                                                                                                                                                                                                                                                                                |     |
| 17 |                              |                      |                                                                                                                                                                                                                                                                                                                                                                                |     |
| 18 |                              |                      |                                                                                                                                                                                                                                                                                                                                                                                |     |
| 19 |                              |                      |                                                                                                                                                                                                                                                                                                                                                                                |     |
| 20 |                              |                      |                                                                                                                                                                                                                                                                                                                                                                                |     |
| 21 | Interventions:               | <a href="#">#11d</a> | Relevant concomitant care and interventions that are permitted or prohibited during the trial                                                                                                                                                                                                                                                                                  | 6,7 |
| 22 | concomitant care             |                      |                                                                                                                                                                                                                                                                                                                                                                                |     |
| 23 |                              |                      |                                                                                                                                                                                                                                                                                                                                                                                |     |
| 24 |                              |                      |                                                                                                                                                                                                                                                                                                                                                                                |     |
| 25 | Outcomes                     | <a href="#">#12</a>  | Primary, secondary, and other outcomes, including the specific measurement variable (eg, systolic blood pressure), analysis metric (eg, change from baseline, final value, time to event), method of aggregation (eg, median, proportion), and time point for each outcome. Explanation of the clinical relevance of chosen efficacy and harm outcomes is strongly recommended | 10f |
| 26 |                              |                      |                                                                                                                                                                                                                                                                                                                                                                                |     |
| 27 |                              |                      |                                                                                                                                                                                                                                                                                                                                                                                |     |
| 28 |                              |                      |                                                                                                                                                                                                                                                                                                                                                                                |     |
| 29 |                              |                      |                                                                                                                                                                                                                                                                                                                                                                                |     |
| 30 |                              |                      |                                                                                                                                                                                                                                                                                                                                                                                |     |
| 31 |                              |                      |                                                                                                                                                                                                                                                                                                                                                                                |     |
| 32 |                              |                      |                                                                                                                                                                                                                                                                                                                                                                                |     |
| 33 |                              |                      |                                                                                                                                                                                                                                                                                                                                                                                |     |
| 34 | Participant timeline         | <a href="#">#13</a>  | Time schedule of enrolment, interventions (including any run-ins and washouts), assessments, and visits for participants. A schematic diagram is highly recommended (see Figure)                                                                                                                                                                                               | 5   |
| 35 |                              |                      |                                                                                                                                                                                                                                                                                                                                                                                |     |
| 36 |                              |                      |                                                                                                                                                                                                                                                                                                                                                                                |     |
| 37 |                              |                      |                                                                                                                                                                                                                                                                                                                                                                                |     |
| 38 |                              |                      |                                                                                                                                                                                                                                                                                                                                                                                |     |
| 39 |                              |                      |                                                                                                                                                                                                                                                                                                                                                                                |     |
| 40 | Sample size                  | <a href="#">#14</a>  | Estimated number of participants needed to achieve study objectives and how it was determined, including clinical and statistical assumptions supporting any sample size calculations                                                                                                                                                                                          | 12  |
| 41 |                              |                      |                                                                                                                                                                                                                                                                                                                                                                                |     |
| 42 |                              |                      |                                                                                                                                                                                                                                                                                                                                                                                |     |
| 43 |                              |                      |                                                                                                                                                                                                                                                                                                                                                                                |     |
| 44 |                              |                      |                                                                                                                                                                                                                                                                                                                                                                                |     |
| 45 | Recruitment                  | <a href="#">#15</a>  | Strategies for achieving adequate participant enrolment to reach target sample size                                                                                                                                                                                                                                                                                            | 5   |
| 46 |                              |                      |                                                                                                                                                                                                                                                                                                                                                                                |     |
| 47 |                              |                      |                                                                                                                                                                                                                                                                                                                                                                                |     |
| 48 |                              |                      |                                                                                                                                                                                                                                                                                                                                                                                |     |
| 49 | <b>Methods: Assignment</b>   |                      |                                                                                                                                                                                                                                                                                                                                                                                |     |
| 50 | <b>of interventions (for</b> |                      |                                                                                                                                                                                                                                                                                                                                                                                |     |
| 51 | <b>controlled trials)</b>    |                      |                                                                                                                                                                                                                                                                                                                                                                                |     |
| 52 |                              |                      |                                                                                                                                                                                                                                                                                                                                                                                |     |
| 53 |                              |                      |                                                                                                                                                                                                                                                                                                                                                                                |     |
| 54 | Allocation: sequence         | <a href="#">#16a</a> | Method of generating the allocation sequence (eg, computer-generated random numbers), and list of any factors for stratification. To reduce predictability of a random sequence, details of any planned restriction (eg, blocking) should be                                                                                                                                   | n/a |
| 55 | generation                   |                      |                                                                                                                                                                                                                                                                                                                                                                                |     |
| 56 |                              |                      |                                                                                                                                                                                                                                                                                                                                                                                |     |
| 57 |                              |                      |                                                                                                                                                                                                                                                                                                                                                                                |     |
| 58 |                              |                      |                                                                                                                                                                                                                                                                                                                                                                                |     |
| 59 |                              |                      |                                                                                                                                                                                                                                                                                                                                                                                |     |
| 60 |                              |                      |                                                                                                                                                                                                                                                                                                                                                                                |     |

provided in a separate document that is unavailable to those who enrol participants or assign interventions

|    |                        |                      |                                                                     |
|----|------------------------|----------------------|---------------------------------------------------------------------|
| 1  |                        |                      |                                                                     |
| 2  |                        |                      |                                                                     |
| 3  |                        |                      |                                                                     |
| 4  | Allocation             | <a href="#">#16b</a> | Mechanism of implementing the allocation sequence (eg, central      |
| 5  | concealment            |                      | telephone; sequentially numbered, opaque, sealed envelopes),        |
| 6  |                        |                      | describing any steps to conceal the sequence until interventions    |
| 7  | mechanism              |                      | are assigned                                                        |
| 8  |                        |                      |                                                                     |
| 9  |                        |                      |                                                                     |
| 10 |                        |                      |                                                                     |
| 11 | Allocation:            | <a href="#">#16c</a> | Who will generate the allocation sequence, who will enrol           |
| 12 | implementation         |                      | participants, and who will assign participants to interventions     |
| 13 |                        |                      |                                                                     |
| 14 | Blinding (masking)     | <a href="#">#17a</a> | Who will be blinded after assignment to interventions (eg, trial    |
| 15 |                        |                      | participants, care providers, outcome assessors, data analysts),    |
| 16 |                        |                      | and how                                                             |
| 17 |                        |                      |                                                                     |
| 18 |                        |                      |                                                                     |
| 19 |                        |                      |                                                                     |
| 20 | Blinding (masking):    | <a href="#">#17b</a> | If blinded, circumstances under which unblinding is permissible,    |
| 21 | emergency unblinding   |                      | and procedure for revealing a participant's allocated intervention  |
| 22 |                        |                      | during the trial                                                    |
| 23 |                        |                      |                                                                     |
| 24 |                        |                      |                                                                     |
| 25 | <b>Methods: Data</b>   |                      |                                                                     |
| 26 | <b>collection,</b>     |                      |                                                                     |
| 27 | <b>management, and</b> |                      |                                                                     |
| 28 | <b>analysis</b>        |                      |                                                                     |
| 29 |                        |                      |                                                                     |
| 30 |                        |                      |                                                                     |
| 31 |                        |                      |                                                                     |
| 32 | Data collection plan   | <a href="#">#18a</a> | Plans for assessment and collection of outcome, baseline, and       |
| 33 |                        |                      | other trial data, including any related processes to promote data   |
| 34 |                        |                      | quality (eg, duplicate measurements, training of assessors) and a   |
| 35 |                        |                      | description of study instruments (eg, questionnaires, laboratory    |
| 36 |                        |                      | tests) along with their reliability and validity, if known.         |
| 37 |                        |                      | Reference to where data collection forms can be found, if not in    |
| 38 |                        |                      | the protocol                                                        |
| 39 |                        |                      |                                                                     |
| 40 |                        |                      |                                                                     |
| 41 |                        |                      |                                                                     |
| 42 |                        |                      |                                                                     |
| 43 | Data collection plan:  | <a href="#">#18b</a> | Plans to promote participant retention and complete follow-up,      |
| 44 | retention              |                      | including list of any outcome data to be collected for participants |
| 45 |                        |                      | who discontinue or deviate from intervention protocols              |
| 46 |                        |                      |                                                                     |
| 47 |                        |                      |                                                                     |
| 48 | Data management        | <a href="#">#19</a>  | Plans for data entry, coding, security, and storage, including any  |
| 49 |                        |                      | related processes to promote data quality (eg, double data entry;   |
| 50 |                        |                      | range checks for data values). Reference to where details of data   |
| 51 |                        |                      | management procedures can be found, if not in the protocol          |
| 52 |                        |                      |                                                                     |
| 53 |                        |                      |                                                                     |
| 54 |                        |                      |                                                                     |
| 55 | Statistics: outcomes   | <a href="#">#20a</a> | Statistical methods for analysing primary and secondary             |
| 56 |                        |                      | outcomes. Reference to where other details of the statistical       |
| 57 |                        |                      | analysis plan can be found, if not in the protocol                  |
| 58 |                        |                      |                                                                     |
| 59 |                        |                      |                                                                     |
| 60 |                        |                      |                                                                     |

|    |                            |                      |                                                                    |       |
|----|----------------------------|----------------------|--------------------------------------------------------------------|-------|
| 1  | Statistics: additional     | <a href="#">#20b</a> | Methods for any additional analyses (eg, subgroup and adjusted     | 12f   |
| 2  | analyses                   |                      | analyses)                                                          |       |
| 3  |                            |                      |                                                                    |       |
| 4  | Statistics: analysis       | <a href="#">#20c</a> | Definition of analysis population relating to protocol non-        | 12f   |
| 5  | population and missing     |                      | adherence (eg, as randomised analysis), and any statistical        |       |
| 6  | data                       |                      | methods to handle missing data (eg, multiple imputation)           |       |
| 7  |                            |                      |                                                                    |       |
| 8  |                            |                      |                                                                    |       |
| 9  |                            |                      |                                                                    |       |
| 10 | <b>Methods: Monitoring</b> |                      |                                                                    |       |
| 11 |                            |                      |                                                                    |       |
| 12 | Data monitoring:           | <a href="#">#21a</a> | Composition of data monitoring committee (DMC); summary of         | 12f   |
| 13 | formal committee           |                      | its role and reporting structure; statement of whether it is       |       |
| 14 |                            |                      | independent from the sponsor and competing interests; and          |       |
| 15 |                            |                      | reference to where further details about its charter can be found, |       |
| 16 |                            |                      | if not in the protocol. Alternatively, an explanation of why a     |       |
| 17 |                            |                      | DMC is not needed                                                  |       |
| 18 |                            |                      |                                                                    |       |
| 19 |                            |                      |                                                                    |       |
| 20 |                            |                      |                                                                    |       |
| 21 |                            |                      |                                                                    |       |
| 22 | Data monitoring:           | <a href="#">#21b</a> | Description of any interim analyses and stopping guidelines,       | n/a   |
| 23 | interim analysis           |                      | including who will have access to these interim results and make   |       |
| 24 |                            |                      | the final decision to terminate the trial                          |       |
| 25 |                            |                      |                                                                    |       |
| 26 |                            |                      |                                                                    |       |
| 27 | Harms                      | <a href="#">#22</a>  | Plans for collecting, assessing, reporting, and managing solicited | 12    |
| 28 |                            |                      | and spontaneously reported adverse events and other unintended     |       |
| 29 |                            |                      | effects of trial interventions or trial conduct                    |       |
| 30 |                            |                      |                                                                    |       |
| 31 |                            |                      |                                                                    |       |
| 32 |                            |                      |                                                                    |       |
| 33 | Auditing                   | <a href="#">#23</a>  | Frequency and procedures for auditing trial conduct, if any, and   | n/a   |
| 34 |                            |                      | whether the process will be independent from investigators and     |       |
| 35 |                            |                      | the sponsor                                                        |       |
| 36 |                            |                      |                                                                    |       |
| 37 |                            |                      |                                                                    |       |
| 38 | <b>Ethics and</b>          |                      |                                                                    |       |
| 39 | <b>dissemination</b>       |                      |                                                                    |       |
| 40 |                            |                      |                                                                    |       |
| 41 |                            |                      |                                                                    |       |
| 42 | Research ethics            | <a href="#">#24</a>  | Plans for seeking research ethics committee / institutional review | 2     |
| 43 | approval                   |                      | board (REC / IRB) approval                                         |       |
| 44 |                            |                      |                                                                    |       |
| 45 |                            |                      |                                                                    |       |
| 46 | Protocol amendments        | <a href="#">#25</a>  | Plans for communicating important protocol modifications (eg,      | 2, 13 |
| 47 |                            |                      | changes to eligibility criteria, outcomes, analyses) to relevant   |       |
| 48 |                            |                      | parties (eg, investigators, REC / IRBs, trial participants, trial  |       |
| 49 |                            |                      | registries, journals, regulators)                                  |       |
| 50 |                            |                      |                                                                    |       |
| 51 |                            |                      |                                                                    |       |
| 52 |                            |                      |                                                                    |       |
| 53 | Consent or assent          | <a href="#">#26a</a> | Who will obtain informed consent or assent from potential trial    | 6     |
| 54 |                            |                      | participants or authorised surrogates, and how (see Item 32)       |       |
| 55 |                            |                      |                                                                    |       |
| 56 |                            |                      |                                                                    |       |
| 57 |                            |                      |                                                                    |       |
| 58 |                            |                      |                                                                    |       |
| 59 |                            |                      |                                                                    |       |
| 60 |                            |                      |                                                                    |       |

|    |                          |                      |                                                                      |       |
|----|--------------------------|----------------------|----------------------------------------------------------------------|-------|
| 1  | Consent or assent:       | <a href="#">#26b</a> | Additional consent provisions for collection and use of              | 6     |
| 2  | ancillary studies        |                      | participant data and biological specimens in ancillary studies, if   |       |
| 3  |                          |                      | applicable                                                           |       |
| 4  |                          |                      |                                                                      |       |
| 5  |                          |                      |                                                                      |       |
| 6  | Confidentiality          | <a href="#">#27</a>  | How personal information about potential and enrolled                | 12    |
| 7  |                          |                      | participants will be collected, shared, and maintained in order to   |       |
| 8  |                          |                      | protect confidentiality before, during, and after the trial          |       |
| 9  |                          |                      |                                                                      |       |
| 10 |                          |                      |                                                                      |       |
| 11 | Declaration of interests | <a href="#">#28</a>  | Financial and other competing interests for principal investigators  | 13    |
| 12 |                          |                      | for the overall trial and each study site                            |       |
| 13 |                          |                      |                                                                      |       |
| 14 |                          |                      |                                                                      |       |
| 15 | Data access              | <a href="#">#29</a>  | Statement of who will have access to the final trial dataset, and    | 12f   |
| 16 |                          |                      | disclosure of contractual agreements that limit such access for      |       |
| 17 |                          |                      | investigators                                                        |       |
| 18 |                          |                      |                                                                      |       |
| 19 |                          |                      |                                                                      |       |
| 20 | Ancillary and post trial | <a href="#">#30</a>  | Provisions, if any, for ancillary and post-trial care, and for       | n/a   |
| 21 | care                     |                      | compensation to those who suffer harm from trial participation       |       |
| 22 |                          |                      |                                                                      |       |
| 23 |                          |                      |                                                                      |       |
| 24 | Dissemination policy:    | <a href="#">#31a</a> | Plans for investigators and sponsor to communicate trial results     | 2, 13 |
| 25 | trial results            |                      | to participants, healthcare professionals, the public, and other     |       |
| 26 |                          |                      | relevant groups (eg, via publication, reporting in results           |       |
| 27 |                          |                      | databases, or other data sharing arrangements), including any        |       |
| 28 |                          |                      | publication restrictions                                             |       |
| 29 |                          |                      |                                                                      |       |
| 30 |                          |                      |                                                                      |       |
| 31 |                          |                      |                                                                      |       |
| 32 |                          |                      |                                                                      |       |
| 33 | Dissemination policy:    | <a href="#">#31b</a> | Authorship eligibility guidelines and any intended use of            | 13    |
| 34 | authorship               |                      | professional writers                                                 |       |
| 35 |                          |                      |                                                                      |       |
| 36 |                          |                      |                                                                      |       |
| 37 | Dissemination policy:    | <a href="#">#31c</a> | Plans, if any, for granting public access to the full protocol,      | n/a   |
| 38 | reproducible research    |                      | participant-level dataset, and statistical code                      |       |
| 39 |                          |                      |                                                                      |       |
| 40 |                          |                      |                                                                      |       |
| 41 | <b>Appendices</b>        |                      |                                                                      |       |
| 42 |                          |                      |                                                                      |       |
| 43 | Informed consent         | <a href="#">#32</a>  | Model consent form and other related documentation given to          | 6     |
| 44 | materials                |                      | participants and authorised surrogates                               |       |
| 45 |                          |                      |                                                                      |       |
| 46 |                          |                      |                                                                      |       |
| 47 | Biological specimens     | <a href="#">#33</a>  | Plans for collection, laboratory evaluation, and storage of          | 7     |
| 48 |                          |                      | biological specimens for genetic or molecular analysis in the        |       |
| 49 |                          |                      | current trial and for future use in ancillary studies, if applicable |       |
| 50 |                          |                      |                                                                      |       |
| 51 |                          |                      |                                                                      |       |

The SPIRIT Explanation and Elaboration paper is distributed under the terms of the Creative Commons Attribution License CC-BY-NC. This checklist was completed on 07. November 2022 using <https://www.goodreports.org/>, a tool made by the [EQUATOR Network](#) in collaboration with [Penelope.ai](#)

# BMJ Open

**Protocol for a multicentre cross-sectional, longitudinal ambulatory clinical trial in rheumatoid arthritis and Parkinson's disease patients analysing the relation between the gut microbiome, fasting and immune status in Germany (ExpoBiome)**

|                                 |                                                                                                                                                                                                                                                                                                                                                                                                                                                                                                                                                                                                                                                                                                                                                                                                                                                                                                                                                                                                                                                                                                                                                                                                                                                                                                                                                                                                                                                                                                                                                                                                                                                                                      |
|---------------------------------|--------------------------------------------------------------------------------------------------------------------------------------------------------------------------------------------------------------------------------------------------------------------------------------------------------------------------------------------------------------------------------------------------------------------------------------------------------------------------------------------------------------------------------------------------------------------------------------------------------------------------------------------------------------------------------------------------------------------------------------------------------------------------------------------------------------------------------------------------------------------------------------------------------------------------------------------------------------------------------------------------------------------------------------------------------------------------------------------------------------------------------------------------------------------------------------------------------------------------------------------------------------------------------------------------------------------------------------------------------------------------------------------------------------------------------------------------------------------------------------------------------------------------------------------------------------------------------------------------------------------------------------------------------------------------------------|
| Journal:                        | <i>BMJ Open</i>                                                                                                                                                                                                                                                                                                                                                                                                                                                                                                                                                                                                                                                                                                                                                                                                                                                                                                                                                                                                                                                                                                                                                                                                                                                                                                                                                                                                                                                                                                                                                                                                                                                                      |
| Manuscript ID                   | bmjopen-2022-071380.R3                                                                                                                                                                                                                                                                                                                                                                                                                                                                                                                                                                                                                                                                                                                                                                                                                                                                                                                                                                                                                                                                                                                                                                                                                                                                                                                                                                                                                                                                                                                                                                                                                                                               |
| Article Type:                   | Protocol                                                                                                                                                                                                                                                                                                                                                                                                                                                                                                                                                                                                                                                                                                                                                                                                                                                                                                                                                                                                                                                                                                                                                                                                                                                                                                                                                                                                                                                                                                                                                                                                                                                                             |
| Date Submitted by the Author:   | 14-Jul-2023                                                                                                                                                                                                                                                                                                                                                                                                                                                                                                                                                                                                                                                                                                                                                                                                                                                                                                                                                                                                                                                                                                                                                                                                                                                                                                                                                                                                                                                                                                                                                                                                                                                                          |
| Complete List of Authors:       | <p>Hansen, Bérénice; LCSB<br/> Laczny, Cédric C.; LCSB<br/> Aho, Velma T.E.; LCSB<br/> Frachet-Bour, Audrey; LCSB<br/> Habier, Janine; LCSB<br/> Ostaszewski, Marek; LCSB<br/> Michalsen, Andreas; Charité Universitätsmedizin Berlin, Institute for Social Medicine, Epidemiology and Health Economics; Immanuel Hospital Berlin-Wannsee Branch, Department of Internal and Integrative Medicine<br/> Hanslian, Etienne; Charite Universitätsmedizin Berlin, Institute for Social Medicine, Epidemiology and Health Economics; Immanuel Hospital Berlin-Wannsee Branch<br/> Koppold-Liebscher, Daniela; Charité Universitätsmedizin Berlin, Institute for Social Medicine, Epidemiology and Health Economics; Immanuel Hospital Berlin-Wannsee Branch<br/> Hartmann, Anika; Charité Universitätsmedizin Berlin, Institute of Social Medicine, Epidemiology and Health Economics; Charité Universitätsmedizin Berlin, Department of Dermatology, Venereology and Allergology<br/> Steckhan, Nico; Charité Universitätsmedizin Berlin, Institute for Social Medicine, Epidemiology and Health Economics; University of Potsdam, Digital Health - Connected Healthcare, Hasso Plattner Institute<br/> Mollenhauer, Brit; University Medical Center Göttingen; Paracelsus-Kliniken Deutschland GmbH<br/> Schade, Sebastian; University Medical Center Göttingen; Paracelsus-Kliniken Deutschland GmbH,<br/> Roomp, Kirsten; LCSB<br/> Schneider, Jochen; LCSB; Saarland University Hospital and Saarland University Faculty of Medicine, Department of Internal Medicine and Psychiatry<br/> Wilmes, Paul; LCSB; University of Luxembourg, Department of Life Sciences and Medicine</p> |
| <b>Primary Subject Heading</b>: | Nutrition and metabolism                                                                                                                                                                                                                                                                                                                                                                                                                                                                                                                                                                                                                                                                                                                                                                                                                                                                                                                                                                                                                                                                                                                                                                                                                                                                                                                                                                                                                                                                                                                                                                                                                                                             |
| Secondary Subject Heading:      | Immunology (including allergy), Rheumatology, Pharmacology and                                                                                                                                                                                                                                                                                                                                                                                                                                                                                                                                                                                                                                                                                                                                                                                                                                                                                                                                                                                                                                                                                                                                                                                                                                                                                                                                                                                                                                                                                                                                                                                                                       |

1  
2  
3  
4  
5  
6  
7  
8  
9  
10  
11  
12  
13  
14  
15  
16  
17  
18  
19  
20  
21  
22  
23  
24  
25  
26  
27  
28  
29  
30  
31  
32  
33  
34  
35  
36  
37  
38  
39  
40  
41  
42  
43  
44  
45  
46  
47  
48  
49  
50  
51  
52  
53  
54  
55  
56  
57  
58  
59  
60

|           |                                                                                                                                                    |
|-----------|----------------------------------------------------------------------------------------------------------------------------------------------------|
|           | therapeutics, Neurology, Evidence based practice                                                                                                   |
| Keywords: | IMMUNOLOGY, Rheumatology < INTERNAL MEDICINE, MICROBIOLOGY, Parkinson-s disease < NEUROLOGY, NUTRITION & DIETETICS, Clinical trials < THERAPEUTICS |
|           |                                                                                                                                                    |

SCHOLARONE™  
Manuscripts

1  
2  
3  
4 1 **Protocol for a multicentre cross-sectional, longitudinal ambulatory**  
5  
6 2 **clinical trial in rheumatoid arthritis and Parkinson's disease patients**  
7  
8 3 **analysing the relation between the gut microbiome, fasting and**  
9  
10 4 **immune status in Germany (ExpoBiome)**

11 5  
12 6 Bérénice Hansen<sup>1</sup>, Cédric C. Laczny<sup>1</sup>, Velma T.E. Aho<sup>1</sup>, Audrey Frachet-Bour<sup>1</sup>, Janine Habier<sup>1</sup>, Marek  
13 7 Ostaszewski<sup>1</sup>, Andreas Michalsen<sup>4,5</sup>, Etienne Hanslian<sup>4,5</sup>, Daniela A. Koppold<sup>4,5,8</sup>, Anika Hartmann<sup>4,10</sup>,  
14 8 Nico Steckhan<sup>4,9</sup>, Brit Mollenhauer<sup>6,7</sup>, Sebastian Schade<sup>6,7</sup>, Kirsten Roomp<sup>1</sup>, Jochen G. Schneider<sup>1,3+</sup>,  
15 9 Paul Wilmes<sup>1,2+</sup>

16 10  
17 11 <sup>1</sup>Luxembourg Centre for Systems Biomedicine, University of Luxembourg, Campus Belval, 7, avenue des Hauts-  
18 12 Fourneaux, L-4362 Esch-sur-Alzette, Luxembourg

19 13  
20 14 <sup>2</sup>Department of Life Sciences and Medicine, University of Luxembourg, 7, avenue des Hauts-Fourneaux, L-4362  
21 15 Esch-sur-Alzette, Luxembourg

22 16  
23 17 <sup>3</sup>Department of Internal Medicine and Psychiatry, Saarland University Medical Center, D- 66421 Homburg Saar,  
24 18 Germany

25 19  
26 20 <sup>4</sup>Institute for Social Medicine, Epidemiology and Health Economics, Charité – Universitätsmedizin Berlin,  
27 21 corporate member of Freie Universität Berlin, Humboldt-Universität zu Berlin, and Berlin Institute of Health

28 22  
29 23 <sup>5</sup>Department of Internal and Integrative Medicine, Immanuel Hospital Berlin, Germany

30 24  
31 25 <sup>6</sup>Paracelsus-Elena-Klinik, Kassel, Germany

32 26  
33 27 <sup>7</sup>University Medical Center Göttingen, Germany

34 28  
35 29 <sup>8</sup>Department of Pediatrics, Division of Oncology and Hematology, Charité – Universitätsmedizin Berlin,  
36 30 Corporate Member of Freie Universität Berlin, Humboldt-Universität zu Berlin and Berlin Institute of Health,  
37 31 Berlin, Germany

38 32  
39 33 <sup>9</sup>Digital Health - Connected Healthcare, Hasso Plattner Institute, University of Potsdam, Potsdam, Germany

40 34  
41 35 <sup>10</sup>Department of Dermatology, Venereology and Allergology, Charité—Universitätsmedizin Berlin, Corporate  
42 36 Member of Freie Universität Berlin and Humboldt-Universität zu Berlin, Berlin, Germany

43 37  
44 38 +contributed equally

45 39  
46 40 \*Correspondence to:

47 41  
48 42 Jochen Schneider (jochen.schneider@uni.lu)

49 43 Paul Wilmes (paul.wilmes@uni.lu)

50 44  
51 45 Luxembourg Centre for Systems Biomedicine,  
52 46 University of Luxembourg, Campus Belval,  
53 47 7, avenue des Hauts-Fourneaux,  
54 48 L-4362 Esch-sur-Alzette, Luxembourg

55 49  
56 50 Word count: 4461



## Abstract

### Introduction

Chronic inflammatory diseases like rheumatoid arthritis (RA) and neurodegenerative disorders like Parkinson's disease (PD) have recently been associated with a decreased diversity in the gut microbiome, emerging as key driver of various diseases. The specific interactions between gut-borne microorganisms and host pathophysiology remain largely unclear. The microbiome can be modulated by interventions comprising nutrition.

The aim of our clinical study is to (1) examine effects of prolonged fasting and time-restricted eating (TRE) on the outcome parameters and the immunophenotypes of RA and PD with (2) special consideration of microbial taxa and molecules associated with changes expected in (1), and (3) identify factors impacting the disease course and treatment by in-depth screening of microorganisms and molecules in personalised HuMiX gut-on-chip models, to identify novel targets for anti-inflammatory therapy.

### Methods and Analysis

This trial is an open-label, multicentre, controlled clinical trial consisting of a cross-sectional and a longitudinal study. A total of 180 patients is recruited. For the cross-sectional study, 60 patients with PD, 60 patients with RA and 60 healthy controls are recruited at two different, specialized clinical sites. For the longitudinal part, 30 patients with PD and 30 patients with RA undergo 5-7 days of prolonged fasting (PF) followed by TRE (16:8) for a period of 12 months. One baseline visit takes place before the PF intervention and 10 follow-up visits will follow over a period of 12 months (April 2021 to November 2023).

### Ethics and dissemination

Ethical approval was obtained to plan and conduct the trial from the institutional review board of the Charité-Universitätsmedizin Berlin (EA1/204/19), the ethics committee of the state medical association (Landesärztekammer) of Hessen (2021-2230-zvBO) and the Ethics Review Panel (ERP) of the University of Luxembourg (ERP 21-001-A ExpoBiome). The results of this study will be disseminated through peer-reviewed publications, scientific presentations and social media.

### Trial registration number at [clinicaltrials.gov](https://clinicaltrials.gov):

NCT04847011

**Key words:** Microbiome, fasting therapy, intermittent fasting, time restricted eating, chronic disease, rheumatoid arthritis, Parkinson's disease, nutrition, chronic diseases, ExpoBiome, inflammation, gut on a chip, HuMiX, immunophenotype, metagenomics, metatranscriptomics, metaproteomics, metabolomics

### Strengths and limitations of the study

- The participants of the longitudinal study will be closely monitored for 12 months and routine blood parameters as well as anthropometric data and questionnaires will be precisely documented.

- 94 • This study will identify novel microbiome-derived common and disease-associated  
95 molecules involved in immune system modulation in two major chronic diseases: RA  
96 and PD.
- 97 • This study aims at also identifying novel targeted pathways to control chronic  
98 inflammatory conditions in the future.
- 99 • A limitation is the heterogeneity of the cohorts regarding age and sex, which is due to  
100 the prevalence of the diseases: RA is more common in women, while PD is more  
101 common in men and has a later disease onset.
- 102 • A bias exists in choosing RA and PD as chronic disorders to study immunophenotypes  
103 although generalisable results are targeted.  
104

## 105 Introduction (1339)

106  
107 The human microbiome is emerging as a key driver of various diseases through its complex of distinct  
108 yet connected biomolecules (referred to as the “*expobiome*”)[1, 2]. The expobiome comprises a  
109 diverse set of nucleic acids, polypeptides and metabolites which, in the gut alone, are present in  
110 substantial concentrations[1]. However, the specific interactions between gut-borne microorganisms  
111 and host (patho)physiology remain largely unknown. Although host genetics shape the composition  
112 of the gut microbiome, the latter is particularly influenced by non-genetic factors such as lifestyle and  
113 diet[3, 4]. Therefore, the microbiome is a plausible target to modify health outcomes.

114  
115 Individuals suffering from chronic diseases, including autoimmune, metabolic, and neurodegenerative  
116 diseases as well as cancer, often present alterations in their gut microbiome composition. These shifts  
117 are typically characterised by an overgrowth of one or several microbial species with likely adverse  
118 effects as well as a decrease in beneficial taxa[5]. Such imbalances are referred to as dysbiosis.  
119 Although structural microbiome changes are clearly detectable, the mechanistic or functional  
120 consequences of dysbiosis are still largely unknown. However, they may result in dysregulated  
121 interactions with the immune system[6]. Considering the intricacy of the immune system, the  
122 question arises whether the observed microbiome changes are cause or consequence of disease. This  
123 implies that, in addition to the genetic predisposition of the host, the gut microbiome needs to be  
124 considered a potential pathogenic factor or major driver of disease onset and course[3, 4].  
125

126 RA and PD are two specific examples representing dysregulated microbiome-immune system  
127 interactions [7, 8]. RA is a multifactorial, chronic, and systemic autoimmune disease, primarily  
128 affecting the lining of the synovial joints with a higher risk and younger age for disease onset in women  
129 and a global prevalence of 1%[9, 10]. The exact disease pathogenesis is still unclear and no cure for  
130 RA currently exists. In addition to the common local articular symptoms of RA, systemic comorbidities  
131 can affect the vasculature, metabolism and bones[11]. Besides various environmental risk factors e.g.  
132 smoking and a Western diet, the host microbiome is associated with the pathophysiology of the  
133 disease[12]. The diversity of the gut microbiome has been reported to be decreased in individuals with  
134 RA, compared with the general population, and is correlated with disease duration, activity, and  
135 autoantibody levels[13, 14]. Studies in murine models also report that autoimmune arthritis is strongly  
136 attenuated under germ-free conditions[15]. The introduction of specific bacteria, e.g. segmented  
137 filamentous bacteria, into germ-free animals or oral infection with *Porphyromonas gingivalis* drive  
138 autoimmune arthritis through activation of T helper cells[15]. Several different taxa, including  
139 *Prevotella copri*, *Lactobacillus* spp. and *Colinsella* spp. are enriched in the gut microbiome of patients  
140 with RA and correlate positively with disease markers e.g. immunoglobulins IgA and IgG , while other  
141 taxa like *Haemophilus* spp. and *Faecalibacterium* spp. are typically found at lower abundances in

1  
2  
3 142 patients with RA compared to healthy individuals[13, 16, 17]. Alterations of the gut microbiome may  
4 143 therefore have an important impact on RA pathophysiology[12].  
5 144

6 145 PD affects 0.4-2% of the population over 65 years worldwide and is the second most common  
7 146 progressive neurodegenerative disease with men being 1.5 times more likely to be affected than  
8 147 women[18]. Cardinal symptoms are motor deficiencies such as tremor and rigidity, but also include a  
9 148 wide range of non-motor symptoms, such as hyposmia, depression, insomnia or cognitive impairment,  
10 149 severely impacting patients' quality of life[19]. Aggregations of the protein  $\alpha$ -synuclein in the  
11 150 dopaminergic substantia nigra represent the main neuropathological manifestations[20]. PD-  
12 151 associated loss of dopaminergic neurons involves mechanisms of inflammatory and autoimmune  
13 152 responses with microglial activity as a major driver [21].Dysbiosis of the gut microbiome has been  
14 153 associated with the characteristic motor deficits and pathophysiological changes in the enteric and  
15 154 central nervous systems in animal studies. Increased relative abundances of the genera *Akkermansia*,  
16 155 *Bifidobacterium*, *Lactobacillus*, and *Methanobrevibacter* and decreased abundances in  
17 156 *Faecalibacterium* and *Roseburia* have been reported[22, 23]. Two recently published clinical-trials  
18 157 with prebiotic supplementation in PD observed a shift in gut microbiome composition, an increase in  
19 158 short-chain fatty acids (SCFA) and a reduction in non-motor-symptoms [24, 25]. Most patients with  
20 159 PD suffer from gastrointestinal symptoms such as constipation and irritable bowel syndrome (IBS) -  
21 160 like symptoms[26]. The gut-brain axis, e.g. by-products produced by the gut microbiome, may  
22 161 contribute to the production of  $\alpha$ -synuclein aggregates in the enteric nervous system[27]. In addition,  
23 162 increased intestinal permeability[28] as driver for enteric inflammation occur in PD and substantiate  
24 163 a role of peripheral inflammation in the initiation and the progression of the disease[29].  
25 164

26 165 One factor with known major impact on the gut microbiome and on chronic diseases is diet[7]. Dietary  
27 166 approaches as fasting have already been used by Hippocrates in the 5<sup>th</sup> century BCE and have been  
28 167 applied ever since by numerous medical schools to treat acute and chronic diseases [30-32]. Various  
29 168 practices of caloric restriction through fasting have repeatedly shown remarkable health benefits[33,  
30 169 34]. Maifeld *et al.* found that a 5-day fast followed by a modified Dietary Approach to Stop  
31 170 Hypertension (DASH), with additional emphasis on plant-based and Mediterranean diets, reduced  
32 171 systolic blood pressure, BMI, and the need for antihypertensive medications at three months post  
33 172 intervention compared with DASH alone [35].  
34 173

35 174 Furthermore, Choi *et al.* demonstrated that cycles of a fasting-mimicking diet suppress autoimmunity  
36 175 and stimulate remyelination via oligodendrocyte regeneration in a murine experimental autoimmune  
37 176 encephalomyelitis (EAE) model[36]. Jordan *et al.* described a reduction in monocyte metabolic and  
38 177 inflammatory activity after a short-term fast and conclude that fasting attenuates chronic  
39 178 inflammatory diseases without compromising monocyte capacity for mobilisation during acute  
40 179 infectious inflammation and tissue repair[37].  
41 180

42 181 These improvements can, however, typically only be maintained for a limited period of time, and the  
43 182 symptoms can reappear after reintroduction of the patients' standard diet. Hence, protocols to sustain  
44 183 these beneficial effects are of utmost importance. In mouse models of PD, intermittent fasting (IF) has  
45 184 led to several improvements including decreased excitotoxicity, reduced neurodegeneration and  
46 185 protection against autonomic dysfunction, motor and cognitive decline[38].  
47 186

48 187 IF and PF may have potent immunomodulatory effects which may partially be mediated by the gut  
49 188 microbiome and the fasting induced alterations of the latter[39]. These microbial shifts include  
50 189 upregulation of *Akkermansia muciniphila*, *Bacteroides fragilis*, other *Bacteroides* spp., Proteobacteria,  
51 190 and butyric acid producing *Lachnospiraceae*, but also *Odoribacter*, which is negatively associated with  
52 191 blood pressure[35, 40]. Interestingly, an overall decrease of the Firmicutes/Bacteroidetes ratio could  
53 192 be observed, a high ratio is commonly associated with several pathologies, including RA [41].  
54  
55  
56  
57  
58  
59  
60

1  
2  
3 193  
4 194 A potential mechanism underlying the observed beneficial effects induced by dietary interventions  
5 195 might be a direct gut microbiome-immune system interaction by pattern recognition. The microbiome  
6 196 can regulate the intestinal innate immune system by modulating toll-like receptor (TLR) expression on  
7 197 immunosensor cell surface through microbe-associated molecular patterns (MAMPs), which can  
8 198 consequently trigger cytokine production and up-regulation of molecules on antigen presenting cells,  
9 199 leading to activation of T cells[42]. Therefore, a change in gut microbiome composition can lead to  
10 200 different outcomes in immune signalling pathways and either favour or suppress inflammation and  
11 201 autoimmunity.  
12 202

13 203 The impact and importance of the gut microbiome on human physiology and its potential  
14 204 modifications by nutrition and dietary patterns, have been underestimated for centuries[43]. Reasons  
15 205 may include missing standardised therapeutic protocols, the interindividual variability in the response  
16 206 to fasting, lack of knowledge about possible adverse effects, and difficulties in the interpretation of  
17 207 underlying mechanisms seen in clinical trials, but also in the comparably low potential for achieving  
18 208 economic revenue or scientific impact[8].  
19 209

20 210 Modern experimental approaches and computational integration allow a multi-layer analysis of  
21 211 digestive processes in low caloric settings including the gut microbiome[44]. These technological  
22 212 developments also permit a closer investigation of the link between the immune system and severe  
23 213 caloric restriction.  
24 214

25 215 To our knowledge no clinical trials have been investigating the connection between IF or PF and PD in  
26 216 humans so far[38]. Our study aims to elucidate the causal relationship between the gut microbiome  
27 217 and the immune system. To do so, we will use analyses of the molecular basis of human-microbiome  
28 218 interactions enabled by high throughput methodologies such as the combination of metagenomics,  
29 219 metatranscriptomics and metaproteomics. Moreover, we are aiming at identifying new genes,  
30 220 proteins, metabolites, and host pathways facilitating the development of novel diagnostic and  
31 221 therapeutic tools[45, 46].  
32 222

## 33 223 **Methods and Analysis (3122)**

34 224

### 35 225 **Study objectives**

36 226 The first objective of the study is to define specific gut microbiome-derived molecules in RA and PD,  
37 227 compared to healthy individuals, and relate this information to the immunophenotypes of the  
38 228 individuals. The second objective is to identify and track common and disease-specific molecular  
39 229 signatures to predict the outcome of a gut microbiome-targeted therapeutic intervention, here  
40 230 fasting, on inflammation-driven symptoms in RA and PD. The third objective of the study is to identify  
41 231 and validate microbiome-derived effector molecules which downregulate pro-inflammatory innate  
42 232 and adaptive immune pathways.  
43 233

### 44 234 **Study design**

45 235 The ExpoBiome cohort consists of 180 adult individuals, meeting the exclusion and inclusion criteria  
46 236 (Table 1), for the cross-sectional study (objectives 1 and 3) and 60 adult individuals for the longitudinal  
47 237 study (objectives 2 and 3). There are five different arms in total: (1) RA – cross-sectional arm [60  
48 238 patients], (2) PD – cross-sectional arm [60 patients], and (3) healthy controls – cross-sectional arm [60  
49 239 patients], (4) RA – longitudinal arm [30 patients], (5) PD – longitudinal arm [30 patients] (Figure1).  
50 240

At the first visit (T0), patients answer several questionnaires, and blood, urine, saliva, and stool samples are obtained (Table 2). The longitudinal arms (4) and (5) undergo a 5–7-day PF with a dietary energy supply of max. 350-400 kcal per day with vegetable or grain broths as well as fresh vegetable juices[31, 40]. After the PF, the longitudinal arms follow a dietary regimen including the concept of TRE for a period of 12 months following the 16:8 pattern[47]. This means that food intake is allowed ad libitum for 8 h, followed by 16 h of fasting where no food should be consumed. The intake of non-caloric beverages, e.g., water, unsweetened tea or coffee is, however, allowed. The participants attend one follow-up visit (T2) during the PF and 9 follow-up visits during the 12 months of TRE (Figure 1).

## Patient and Public Involvement

Feedback of patients during former clinical trials at the study centre in Berlin was integrated in the planning and design of the fasting intervention of this study. Patients are not involved in the conduct, reporting, or dissemination plans of this research.

## Recruitment and randomisation

Patients are recruited by the specialised sites via different sources, e.g., by direct referral from either a physician at the Immanuel Hospital Berlin and the outpatient department of the Institute of Social Medicine, Epidemiology and Health Economics at Charité-Universitätsmedizin Berlin, or the Paracelsus-Elena Clinic in Kassel, or by non-personal advertising strategies (e.g. flyers or social media). For PD, the patients are screened by an experienced movement disorders specialist for featuring at least two of resting tremor, bradykinesia, and rigidity according to the United Kingdom Parkinson's Disease Society Brain Bank criteria[48]. Additionally, patients must show evidence of a dopaminergic deficit, either with DaTScan imaging or with a clear response to dopaminergic drugs. Motor and non-motor symptoms are assessed with the MDS-UPDRS (part I – IV) including the Hoehn and Yahr (severity) scale[49]. Additional PD-specific scales as Parkinson's Disease Sleep Scale-2, Parkinson's Disease Questionnaire-39, Non-Motor Symptoms Questionnaire and Non-Motor Symptoms Scale are used.

For patients with RA, the diagnosis has been made prior to the study by an experienced rheumatologist according to the European League Against Rheumatism (EULAR) criteria[50]. All clinical stages of RA will be included. We excluded patients with a BMI <18.5, as this indicates underweight, and fasting is not recommended. We did, however, not include an upper limit as fasting might be especially beneficial for patients with a BMI >24.9 and more than 60% of patients with RA are classified as overweight or obese[51]. For comorbidities we excluded mainly diseases which are known to interfere with the gut microbiome and might be potential confounders.

The chosen exclusion criteria will optimize the pairing process of healthy controls and patients with either RA or PD. However, as we have two diseases with different anthropometric characteristics (including age, gender, BMI) and only one control group, adding additional inclusion and exclusion criteria in the recruitment process would compromise on optimized matching. Furthermore, for the longitudinal part of the study, each patient will serve as his/her own control over time. Participants meeting all the inclusion and no exclusion criteria (Table 1) are assigned to their respective groups (RA, PD, or healthy control) (Figure 1) for the cross-sectional study after written informed consent. Half of the patients from the RA group and half of the patients from the PD group is selected to take part in the longitudinal part of the study, including the fasting intervention according to their availability for all 11 visits and their willingness to follow TRE over 12 months. This study is an open-label trial, as blinding is not feasible in fasting interventions.

Table 1: Inclusion and exclusion criteria

| Inclusion criteria | Exclusion criteria |
|--------------------|--------------------|
|--------------------|--------------------|

|                                                                                                                                                                                                                                                                                                                                                                                                                                                                                                                                                                                                                                                                                                                                                                                        |                                                                                                                                                                                                                                                                                                                                                                                                                                                                                                                                                                                                                                                                                                                                                                                                                                                                                                                                                                                                                                                                                                                              |
|----------------------------------------------------------------------------------------------------------------------------------------------------------------------------------------------------------------------------------------------------------------------------------------------------------------------------------------------------------------------------------------------------------------------------------------------------------------------------------------------------------------------------------------------------------------------------------------------------------------------------------------------------------------------------------------------------------------------------------------------------------------------------------------|------------------------------------------------------------------------------------------------------------------------------------------------------------------------------------------------------------------------------------------------------------------------------------------------------------------------------------------------------------------------------------------------------------------------------------------------------------------------------------------------------------------------------------------------------------------------------------------------------------------------------------------------------------------------------------------------------------------------------------------------------------------------------------------------------------------------------------------------------------------------------------------------------------------------------------------------------------------------------------------------------------------------------------------------------------------------------------------------------------------------------|
| <ul style="list-style-type: none"> <li>• Age 18-79</li> <li>• One of the following diagnoses: rheumatoid arthritis (first diagnosis &gt;6 weeks ago), Parkinson's disease OR healthy volunteer</li> <li>• Control ("healthy") individuals must be without any evidence of active known or treated RA, without any evidence of active, known or treated central nervous system disease, and without a known family history of idiopathic PD</li> <li>• Control individuals should match the RA or PD individuals as closely as possible (sex, age, education)</li> <li>• Present written declaration of consent</li> <li>• Ability to understand the patient information and willingness to sign the consent form</li> <li>• Consent to specimen collection and specimen use</li> </ul> | <ul style="list-style-type: none"> <li>• Gout or proven bacterial arthritis</li> <li>• Participation in another study</li> <li>• Existing/current eating disorder (bulimia nervosa, anorexia nervosa) within the past 5 years</li> <li>• Severe internal disease (e.g. kidney deficiency with creatinine &gt; 2mg/dl)</li> <li>• Existing vegan diet or fasting during the last six months</li> <li>• Presence or suspicion of atypical PD (e.g. early dementia, early autonomous dysfunction)</li> <li>• Diagnosis of chronic inflammatory bowel diseases, celiac disease or colorectal cancer according to the guidelines of the German Society of Gastroenterology</li> <li>• Use of anti-psychotic drugs</li> <li>• Antibiotic use during the previous 12 months</li> <li>• Start of novel therapy with disease-modifying anti-rheumatic drugs</li> <li>• Pregnancy or breastfeeding women</li> <li>• Contraindication for additional blood draws (e.g. haemoglobin &lt;10)</li> <li>• BMI &lt; 18.5</li> <li>• Psychiatric illness that limits understanding of the examination protocol (unable to consent)</li> </ul> |
|----------------------------------------------------------------------------------------------------------------------------------------------------------------------------------------------------------------------------------------------------------------------------------------------------------------------------------------------------------------------------------------------------------------------------------------------------------------------------------------------------------------------------------------------------------------------------------------------------------------------------------------------------------------------------------------------------------------------------------------------------------------------------------------|------------------------------------------------------------------------------------------------------------------------------------------------------------------------------------------------------------------------------------------------------------------------------------------------------------------------------------------------------------------------------------------------------------------------------------------------------------------------------------------------------------------------------------------------------------------------------------------------------------------------------------------------------------------------------------------------------------------------------------------------------------------------------------------------------------------------------------------------------------------------------------------------------------------------------------------------------------------------------------------------------------------------------------------------------------------------------------------------------------------------------|

289

### 290 Fasting dietary counselling

291 The fasting group is closely monitored by nutritionists trained in fasting therapy, backed up by  
 292 physicians experienced in fasting, from the Charité – Universitätsmedizin Berlin and the Paracelsus-  
 293 Elena Clinic to ensure a uniform implementation of the fasting guidelines and the well-being of the  
 294 study participants. The monitoring consists of several in person and virtual meetings which held  
 295 individually or in group settings. Five meetings including the visits T0 and T2 during the fasting week  
 296 as well as a group meeting after PF to ensure a well-managed start to the TRE phase take place. Group  
 297 sessions are standardised using a pre-set deck of slides to be discussed during the group meetings  
 298 with only minor disease-related differences between the PD and RA groups. All longitudinal  
 299 participants receive a study-specific script with information on fasting procedures. Although the  
 300 adherence of the patients cannot be profoundly controlled in the ambulatory setting, the blood  
 301 samples will allow us to have additional insight into the nutritional habits as well as the fasting state  
 302 of the patients on the day of the visit (blood glucose levels).

303

## 304 Medication

305 The medical treatments of the patients are monitored and documented with every clinical visit. The  
 306 fasting intervention might necessitate temporary adjustments of several medications e.g., anti-  
 307 diabetic and anti-hypertensive drugs as insulin levels and hypertension will be reduced due to lack of  
 308 food intake [31].

309

## 310 Data collection

311 Sample and data collection is performed at the two clinical sites, Charité – Universitätsmedizin Berlin  
 312 and Paracelsus-Elena Clinic (Table 2).

313

314 *Table 2: Sampling procedures.*

### a) Biochemical samples and procedures

Blood (123 mL at T0, 23 mL at T2-T11)

Stool collection (2 mL at T0 and T3-T11)

Saliva collection (3.5 mL at T0-T11)

Midstream urine (50 mL at T0 -T11)

315

### b) Questionnaires

Disease specific

PD:

- Disease Activity Score (DAS-28) [52]
- Parkinson's Disease Sleep Scale-2 (PDSS-2) [53]
- Parkinson's Disease Questionnaire-39 (PDQ-39)[54]
- Simplified Disease Index Score (SDAI) [55]
- Funktionsfragebogen Hannover (FFbH-R) [56]
- Movement Disorder Society Unified PD Rating Scale (MDS-UPDRS)[57]
- Non-Motor Symptoms Questionnaire (NMSQ)[58]
- Non-Motor Symptoms Scale (NMSS)[59]

RA:

- Disease Activity Score (DAS-28) [55]

- 
- Non-Motor Symptoms Questionnaire (NMSQ) [58]
  - Funktionsfragebogen Hannover (FFbH-R) [56]

#### Dietary behaviour and lifestyle

- Fasting experience, expectation, and intervention
- Lifestyle
- 24H-Food-recall
- Food Frequency Questionnaire (FFQ)

#### General health and well-being

- Health Assessment Questionnaire (HAQ)[60]
  - Bristol Stool Scale[61]
  - Quality of Life questionnaire (WHO-5)[62]
  - Hospital Anxiety and Depression Scale (HADS)[63]
  - Profile of Mood States[64]
- 

316

317

### 318 Anthropometric data and questionnaires

319 The electronic data capture system REDCap[65], a secure web-based application, is used to record all  
320 individual specific data. All data is stored on a secure server infrastructure at the host institution in  
321 Luxembourg. Weight, height, body mass index (BMI), heart rate and blood pressure in sitting and  
322 standing position as well as waist-hip-ratio is determined at every visit. Dietary behaviour,  
323 sociodemographic measurements (age, sex, education level, employment status, marital status),  
324 family history, current and previous illness and co-morbidities, and current medications, as well as  
325 disease-specific data, questionnaires about the well-being of the patients and data on the behavioural  
326 factors are collected at baseline, T6 (week 3), T9 (month 6) and T11 (month 12) (Table 2).  
327 Questionnaires (24h-Food Recall, Bristol Stool Scale) are answered at all visits by the study  
328 participants. Data storage, analysis and exchange are done only in pseudonymised fashion. The  
329 nutritional data is analysed using the Nutrilog 3.20 software (Nutrilog SAS, Marans).

330

### 331 Blood samples and parameters

332 Blood samples are collected at each visit, and immediately used for peripheral blood mononuclear cell  
333 (PBMC) isolation (T0), analysis by the study laboratory and centrifugation to freeze plasma samples at  
334 -80°C (T0-T11). A clinical standard laboratory report is generated after every visit for each study  
335 participant (Table 3). In addition to routine blood parameters, anti-citrullinated protein antibody

336

337

338

339

340

341

342

343

344



336 (ACPA), zonulin, fatty-acid binding protein 2 (FABP2), and calprotectin levels are measured. Aliquots  
 337 are securely stored to account for novel observations and testing of hypotheses.

338  
 339 *Table 3: Routine blood parameters measured at each timepoint (T0 for cross-sectional study, T0-T11 for longitudinal study)*

| Haematology – EDTA-<br>blood | Clinical Chemistry –<br>Serum |
|------------------------------|-------------------------------|
| Basophils, %                 | Albumin                       |
| Basophils, abs.              | ALT, 37°C                     |
| Eosinophils, %               | Alkaline Phosphatase,<br>37°C |
| Eosinophils, abs.            | AST, 37°C                     |
| Erythrocytes                 | Bilirubin, total              |
| Haematocrit                  | Cholinesterase                |
| Haemoglobin                  | Cholesterol                   |
| HbA1c                        | Creatinine                    |
| Leucocytes                   | hs-CRP                        |
| Lymphocytes, %               | Glucose, serum                |
| Lymphocytes, abs.            | Gamma-GT, 37°C                |
| MCH                          | HDL-Cholesterol               |
| MCHC                         | LDL-Cholesterol               |
| MCV                          | Potassium                     |
| Monocytes, %                 | Sodium                        |
| Monocytes, abs.              | Total Protein                 |
| Neutrophils, %               | Triglycerides                 |
| Neutrophils, abs.            | Uric Acid                     |
| Platelets                    | Urea/BUN                      |
| RDW                          | <b>Proteins – Serum</b>       |
| Reticulocytes                | Rheumatoid factor H 35.9      |
| Reticulocytes                | <b>Hormones – Serum</b>       |
| Reticulocytes, abs.          | Insulin                       |
|                              | TSH (basal)                   |

340

### 341 Stool, urine and saliva samples

342 The samples listed in Table 2 are collected at each visit, except for stool samples on T2 (fasting week)  
 343 and immediately frozen and stored at -80°C. Stool characteristics are recorded at the time of the  
 344 sampling. Faecal samples represent the main sample type for resolving the dynamic processes driven  
 345 by microbiome in the gut. Also, as the gut microbiome is prone to diurnal fluctuations, the stool  
 346 samples are collected in the morning, as far as possible.

1  
2  
3 347

## 4 348 **Methods applied to samples**

5 349

### 6 349 7 350 **Biomolecular extractions**

8 351 The collected stool samples undergo a biomolecular extraction procedure to allow isolation of  
9 352 concomitant DNA, RNA, proteins, peptides and metabolites from single, unique faecal water samples;  
10 353 this process involves cryo-milling the samples in liquid nitrogen, disassociating metabolites from  
11 354 membrane and cell wall components in a solvent mixture of methanol, chloroform and water and  
12 355 lastly proteins and RNA extraction by a methanol/chloroform and phenol buffer [66, 67]. Faecal water  
13 356 is recovered following centrifugation and filtration, at low-speed or low-flow, respectively, to avoid  
14 357 cell lysis. Nucleic acids are preserved by the addition of ribonuclease inhibitors and isolated by silica-  
15 358 column-based techniques. This protocol involves the use of a robotic platform, ensuring a higher level  
16 359 of standardisation and reproducibility[2].

17 360

### 18 361 **Coupled metagenomic and metatranscriptomic analyses**

19 362 Prior to sequencing library preparation, internal standards are introduced to obtain quantitative  
20 363 sequencing data[68]. Contamination-free metagenomic (MG) and metatranscriptomic (MT) data is  
21 364 generated, processed and analysed using the Integrated Meta-omics Pipeline (IMP)[45], which  
22 365 incorporates pre-processing, assembly, gene annotation, mapping of reads, single nucleotide  
23 366 polymorphism calling, data normalisation as well as analyses of community structure and function in  
24 367 a fully reproducible software framework based on Docker. The MG and MT data is specifically  
25 368 screened for enrichments in genes and pathways with known immunogenic properties[69]. The  
26 369 extracellular biomolecules are linked to specific microbial populations based on the intracellular  
27 370 metagenomic data [70]. In addition, the sequencing data is mapped against genomes of food  
28 371 components[44]. The quantitative data is also related to microbial population sizes to determine the  
29 372 contribution of the resolved microbial populations in stool to the extracellular DNA and RNA  
30 373 complements[71].

31 374

### 32 375 **Metaproteomics**

33 376 For the metaproteomic analyses, filtration is used to separate extracellular peptides from the obtained  
34 377 (poly)peptides. The resulting smaller fractions are then desalted and analysed without proteolytic  
35 378 digestion via liquid chromatography (LC) and mass spectrometry (MS) on an EasyNano-LC coupled  
36 379 online to a QExactive-Plus mass spectrometer (ThermoScientific, Waltham, USA). The identification of  
37 380 ribosomal peptides is done with an integrated catalogue of MG and MT data, while the non-ribosomal  
38 381 peptides are identified using different tools, i.e., MyriMatch, DirecTag as well as CycloBranch[45, 72,  
39 382 73]. The metaproteomic data also allows identification of extracellular (poly)peptides with possible  
40 383 pathogenic functions including protein misfolding and molecular mimicry[74, 75].

41 384

### 42 385 **Metabolomics**

43 386 Metabolomic data is analysed using a combination of targeted and untargeted approaches [44, 67,  
44 387 76]. This highlights the major metabolite classes produced by the gut microbiome with an effect on  
45 388 human physiology including organic acids, SCFA, lipids, branched-chain fatty acids, branched-chain  
46 389 amino acids, vitamins, bile acids and neurotransmitters. Besides external compound calibration series  
47 390 for quantification and quality control samples to ensure data normalisation and data acquisition  
48 391 quality assessment, the metabolite extraction fluid is fortified with multiple internal standards to  
49 392 improve method precision and accuracy[77, 78]. The data is compared to in-house databases and  
50 393 public mass spectral libraries to identify known metabolites. The metabolomic data complements the

51  
52  
53  
54  
55  
56  
57  
58  
59  
60

394 metagenomic and metatranscriptomic data and thus allows further establishments of conclusive links  
395 to metabolic properties in the gut.

396

### 397 Deep immune profiling

398 Deep immune profiling is done using a recently established and optimised panel of metal-labelled  
399 antibodies together with cytometry coupled to mass spectrometry (MS), the Maxpar Direct Immune  
400 Profiling System (MDIPA). This approach allows the simultaneous quantification of 38 parameters on  
401 single cells. Whole blood is stained with the MDIPA kit and stabilised with Proteomic stabiliser Prot-1  
402 (501351694, Smart Tube Inc., Las Vegas) before storage at -80°C. The quantified immune cells  
403 included in the MDIPA panel are CD3+, CD4+, CD8+, monocytes, dendritic cells, granulocytes, MAIT, T  
404 cells, NK and B cells[79]. Cytokine expression profiles is analysed on blood plasma using the Human  
405 Luminex performance Cytokine Panel (R&D Systems Europe, Abingdon), measuring CCL3, CCL4, CCL5,  
406 GM-CSF, IL-1 $\beta$ , IL-2, IL-4, IL-5, IL-6, IL-8, IL-10, IL-12p70, IL-13, IL-15, IL-18, IL-21, IL-27, IL-33, IFN- $\beta$ ,  
407 Galectin-1, IFN- $\gamma$  and TNF- $\alpha$  [69].

408

### 409 Gut-on-a-chip models

410 PBMCs isolated from T0 blood samples are co-cultured with gut-derived microbes under  
411 physiologically representative conditions using the gut-on-a-chip model HuMiX[80]. This model of the  
412 human gastrointestinal interface allows the investigation of the interactions between immune,  
413 epithelial and bacterial cells and specifically the response to fasting in personalised in vitro models.

414

### 415 The Expobiome Map

416 The Expobiome Map (<https://expobiome.lcsb.uni.lu>) illustrates the diverse complex of microbial  
417 immunogenic molecules, including nucleic acids, (poly)peptides, structural molecules, and  
418 metabolites. The interactions between this “expobiome” and human immune pathways are encoded  
419 in the context of chronic diseases[1]. The ExpoBiome Map is visualised using the MINERVA  
420 Platform[81]. Clicking on different elements on the map reveals factors they affect and are affected  
421 by, allowing an easier navigation through the complex relationships between individual microbiome  
422 components in relation to human disease. The multi-omics data generated in the present study will  
423 be integrated with the Map.

424

### 425 Exploratory analysis of novel host-microbiome interactions

426 Unknown non-ribosomal peptides or metabolite features are associated through correlation with  
427 transcripts, proteins, and metabolites. Extracellular DNA fragments, as well as transcripts, proteins  
428 and ribosomal peptides are linked to their genomic context by using IMP[45]. The data generated by  
429 the project will be connected and collated to existing, publicly available datasets.

430

### 431 Outcome parameters

#### 432 Primary Outcome

433 The primary endpoint of the study is the characterisation of the gut microbiome. The evaluation  
434 includes both between-group and within-group differences in the longitudinal study arms with the  
435 fasting intervention.

436

#### 437 Secondary Outcome Measures

438 Secondary outcomes include the identification of common and disease-specific molecular signatures  
439 and the characterisation of microbiome-derived effector molecules impacting the innate and adaptive

1  
2  
3 440 immune pathways. Furthermore, several additional parameters mentioned in *Anthropometric data*  
4 441 *and questionnaires* are assessed over a period of 12 months.  
5 442

### 7 443 **Sample size and power calculation**

8 444 A power calculation using pilot metatranscriptomic data based on faecal extracellular RNA samples  
9 445 was performed to determine the number of subjects to be recruited for the ExpoBiome project. The  
10 446 obtained relative abundances of genera were used for the calculation of the required sample size per  
11 447 group. The power calculation was based on the algorithm as described by Tusher, Tibshirani, and  
12 448 Chu[82]. To achieve a power of 90% (at  $\alpha = 0.05$ ), a total of 50 individuals per group (RA, PD, healthy  
13 449 controls) must be analysed. Considering any possible dropouts, 20% additional subjects are recruited,  
14 450 resulting in a total number of 180 individuals, i.e., 60 per group. For the longitudinal part, a subset of  
15 451 60 adult individuals (30 patients with Parkinson's disease and 30 patients with rheumatoid arthritis)  
16 452 are selected, based on their ability and willingness to participate in the longitudinal part of the study  
17 453 (12 months follow-up). The selected number of participants for the longitudinal study is based on  
18 454 feasibility due to the complexity and high costs of the clinical trial. The total number of subjects in the  
19 455 longitudinal study can be smaller, as each individual serves as their own control.  
20 456

### 23 457 **Adverse events**

24 458 There are no major risks expected for participants. Minor common adverse effects of PF might include  
25 459 headaches, nausea, insomnia, back pain, dyspepsia and fatigue[83]. Any occurring adverse events are  
26 460 recorded at each visit in REDCap[65]. Serious adverse events are communicated to the study  
27 461 coordinator and principal investigator within 24 h of their report.  
28 462

### 31 463 **Data management, monitoring, analysis, and evaluation of data**

32 464 The study participants receive a study ID (pseudonym) which is used for all collected data. Self-  
33 465 administered questionnaires are directly recorded in REDCap. Participant files are kept for at least 10  
34 466 years at the respective clinical sites.

35 467 Weekly meetings between the study team, the different clinical partners, and the principal  
36 468 investigator, ensure a close monitoring of the data. Any occurring adverse events or other issues are  
37 469 thus handled immediately.

38 470 Different statistical tests are performed according to the nature of the data. A premature termination  
39 471 of the study is not envisaged; therefore, no interim analysis is done. Different correlation measures  
40 472 are applied, including Spearman correlation, mutual information on discretised data, distance  
41 473 correlation, maximum information criterion, local similarity analysis and the bioenv approach.  
42 474 Comparison across all omic levels allows identification of common and disease-specific signatures.  
43 475 Multivariate machine learning is used to link different data features to observed patterns. For  
44 476 additional confounding factors, especially in the cross-sectional study, multivariate statistical analysis  
45 477 will be performed. These factors will be accounted for by including confounders in the analysis, e.g.,  
46 478 as covariate in the statistical models.

47 479 The longitudinal part of the study continues for a period of 12 months. After finalisation of this period,  
48 480 there is no follow-up of the participants. Interesting findings will be further validated using the existing  
49 481 sample set and analyses may be performed on additionally collected samples.

50 482 The SPIRIT - checklist (Standard Protocol Items: Recommendations for Interventional Trials) was used  
51 483 to write this protocol [84].  
52  
53  
54  
55  
56  
57  
58  
59  
60

## 484 Trial status

485 The recruitment for the ExpoBiome study started in April 2021 and is currently ongoing. All study  
486 participants should be recruited by the end of 2022. The sample collection will take place from April  
487 2021 to November 2023.  
488

## 489 Ethics and dissemination

490 Ethical approval was obtained to plan and conduct the trial from the institutional review board of the  
491 Charité-Universitätsmedizin Berlin (EA1/204/19), the ethics committee of the state medical  
492 association (Landesärztekammer) of Hessen (2021-2230-zvBO) and the Ethics Review Panel (ERP) of  
493 the University of Luxembourg (ERP 21-001-A ExpoBiome). The results of this study will be  
494 disseminated through peer-reviewed publications, scientific presentations, as well as press releases  
495 and social media postings (Twitter, LinkedIn). Study participants will be contacted and informed by  
496 the respective clinical sites about the outcome and results of the study, once the data analysis has  
497 been completed (dissemination phase).

## 498 Acknowledgements

499 We thank Dr. Catharina Delebinski, Melanie Dell'Oro, Grit Langhans, Ursula Reuß, Maik Schröder and  
500 Nadine Sylvester for their support during the study.  
501

## 502 Author contributions:

503 Study design and protocol were done by Bérénice Hansen, Cédric C. Laczny, Jochen G. Schneider,  
504 Paul Wilmes; the interventional concept was drawn by Etienne Hanslian, Daniela Liebscher, Andreas  
505 Michalsen, Anika Hartmann, Brit Mollenhauer, Sebastian Schade, Nico Steckhan, Jochen G.  
506 Schneider, Paul Wilmes; the clinical trial was designed and is conducted by Etienne Hanslian, Daniela  
507 Liebscher, Andreas Michalsen, Anika Hartmann, Brit Mollenhauer, Sebastian Schade; the procured  
508 funding was provided by Paul Wilmes; the planning of high-throughput applications, statistical  
509 planning, sample size calculation and randomisation were defined by Cédric C. Laczny, Jochen G.  
510 Schneider, Paul Wilmes, Kirsten Roomp; the initial draft of the manuscript and coordination of the  
511 editing process were performed by Bérénice Hansen; the protocol preparation has been done by  
512 Bérénice Hansen, Audrey Frachet-Bour, Janine Habier; the planning of the data analysis was done by  
513 Cédric C. Laczny, Jochen G. Schneider, Paul Wilmes, Kirsten Roomp, Velma T.E. Aho, Marek  
514 Ostaszewski; all authors contributed equally with edits, comments and feedback, read and approved  
515 the final manuscript.  
516

517 **Funding statement:** This project has received funding from the European Research  
518 Council (ERC) under the European Union's Horizon 2020 research and innovation program (grant  
519 agreement No. 863664). This work was supported by the Luxembourg National Research Fund (FNR)  
520 under grant PRIDE/11823097.

## 521 Competing interests statement

522 None declared.

## 523 Supplements

524 The SPIRIT checklist was used to write our report[84].

## References

1. Wilmes, P., et al., *The gut microbiome molecular complex in human health and disease*. Cell Host Microbe, 2022. **30**(9): p. 1201-1206.
2. De Saedeleer, B., et al., *Systematic characterization of human gut microbiome-secreted molecules by integrated multi-omics*. ISME Communications, 2021. **1**(1): p. 82.
3. Greenhalgh, K., et al., *The human gut microbiome in health: establishment and resilience of microbiota over a lifetime*. Environ Microbiol, 2016. **18**(7): p. 2103-16.
4. Hall, A.B., A.C. Tolonen, and R.J. Xavier, *Human genetic variation and the gut microbiome in disease*. Nature Reviews Genetics, 2017. **18**(11): p. 690-699.
5. Baldini, F., et al., *Parkinson's disease-associated alterations of the gut microbiome predict disease-relevant changes in metabolic functions*. BMC Biol, 2020. **18**(1): p. 62.
6. Yoo, J.Y., et al., *Gut Microbiota and Immune System Interactions*. Microorganisms, 2020. **8**(10).
7. Sonnenburg, J.L. and F. Bäckhed, *Diet–microbiota interactions as moderators of human metabolism*. Nature, 2016. **535**(7610): p. 56-64.
8. Zmora, N., J. Suez, and E. Elinav, *You are what you eat: diet, health and the gut microbiota*. Nat Rev Gastroenterol Hepatol, 2019. **16**(1): p. 35-56.
9. Guo, Q., et al., *Rheumatoid arthritis: pathological mechanisms and modern pharmacologic therapies*. Bone Res, 2018. **6**: p. 15.
10. Healthline, V.L. *Rheumatoid Arthritis by the Numbers: Facts, Statistics, and You*. 2021.
11. Scherer, H.U., T. Häupl, and G.R. Burmester, *The etiology of rheumatoid arthritis*. Journal of Autoimmunity, 2020. **110**: p. 102400.
12. Bodkhe, R., B. Balakrishnan, and V. Taneja, *The role of microbiome in rheumatoid arthritis treatment*. Ther Adv Musculoskelet Dis, 2019. **11**: p. 1759720x19844632.
13. Chen, J., et al., *An expansion of rare lineage intestinal microbes characterizes rheumatoid arthritis*. Genome Medicine, 2016. **8**(1): p. 43.
14. Kitamura, K., et al., *Oral and Intestinal Bacterial Substances Associated with Disease Activities in Patients with Rheumatoid Arthritis: A Cross-Sectional Clinical Study*. J Immunol Res, 2022. **2022**: p. 6839356.
15. Wu, H.J., et al., *Gut-residing segmented filamentous bacteria drive autoimmune arthritis via T helper 17 cells*. Immunity, 2010. **32**(6): p. 815-27.
16. Scher, J.U., et al., *Expansion of intestinal Prevotella copri correlates with enhanced susceptibility to arthritis*. eLife, 2013. **2**: p. e01202.
17. Zhang, X., et al., *The oral and gut microbiomes are perturbed in rheumatoid arthritis and partly normalized after treatment*. Nature Medicine, 2015. **21**(8): p. 895-905.
18. Lubomski, M., et al., *Parkinson's disease and the gastrointestinal microbiome*. J Neurol, 2020. **267**(9): p. 2507-2523.
19. Opara, J., et al., *Motor assessment in Parkinson's disease*. Ann Agric Environ Med, 2017. **24**(3): p. 411-415.
20. Tysnes, O.B. and A. Storstein, *Epidemiology of Parkinson's disease*. J Neural Transm (Vienna), 2017. **124**(8): p. 901-905.

- 1  
2  
3 569 21. Garcia, P., et al., *Neurodegeneration and neuroinflammation are linked, but*  
4 570 *independent of alpha-synuclein inclusions, in a seeding/spreading mouse model of*  
5 571 *Parkinson's disease*. *Glia*, 2022. **70**(5): p. 935-960.
- 7 572 22. Heintz-Buschart, A. and P. Wilmes, *Human Gut Microbiome: Function Matters*.  
8 573 *Trends Microbiol*, 2018. **26**(7): p. 563-574.
- 9 574 23. Romano, S., et al., *Meta-analysis of the Parkinson's disease gut microbiome suggests*  
10 575 *alterations linked to intestinal inflammation*. *npj Parkinson's Disease*, 2021. **7**(1): p.  
11 576 27.
- 13 577 24. Becker, A., et al., *Effects of Resistant Starch on Symptoms, Fecal Markers, and Gut*  
14 578 *Microbiota in Parkinson's Disease - The RESISTA-PD Trial*. *Genomics Proteomics*  
15 579 *Bioinformatics*, 2022. **20**(2): p. 274-287.
- 17 580 25. Hall, D.A., et al., *An open label, non-randomized study assessing a prebiotic fiber*  
18 581 *intervention in a small cohort of Parkinson's disease participants*. *Nat Commun*,  
19 582 2023. **14**(1): p. 926.
- 20 583 26. Mertsalmi, T.H., et al., *More than constipation - bowel symptoms in Parkinson's*  
21 584 *disease and their connection to gut microbiota*. *European journal of neurology*, 2017.  
22 585 **24**(11): p. 1375-1383.
- 24 586 27. Dogra, N., R.J. Mani, and D.P. Katare, *The Gut-Brain Axis: Two Ways Signaling in*  
25 587 *Parkinson's Disease*. *Cell Mol Neurobiol*, 2022. **42**(2): p. 315-332.
- 26 588 28. Forsyth, C.B., et al., *Increased intestinal permeability correlates with sigmoid mucosa*  
27 589 *alpha-synuclein staining and endotoxin exposure markers in early Parkinson's*  
28 590 *disease*. *PLoS One*, 2011. **6**(12): p. e28032.
- 30 591 29. Devos, D., et al., *Colonic inflammation in Parkinson's disease*. *Neurobiol Dis*, 2013.  
31 592 **50**: p. 42-8.
- 32 593 30. Britannica, *The Editors of Encyclopaedia*. "fasting". *Encyclopedia Britannica*,,  
33 594 Accessed 3 October 2022. <https://www.britannica.com/topic/fasting>.
- 35 595 31. Hartmann, A.M., et al., *Efficacy of therapeutic fasting and plant-based diet in*  
36 596 *patients with rheumatoid arthritis (NutriFast): study protocol for a randomised*  
37 597 *controlled clinical trial*. *BMJ Open*, 2021. **11**(8): p. e047758.
- 39 598 32. Michalsen, A., *Prolonged fasting as a method of mood enhancement in chronic pain*  
40 599 *syndromes: a review of clinical evidence and mechanisms*. *Curr Pain Headache Rep*,  
41 600 2010. **14**(2): p. 80-7.
- 42 601 33. Vargas-Molina, S., et al., *Effects of a low-carbohydrate ketogenic diet on health*  
43 602 *parameters in resistance-trained women*. *Eur J Appl Physiol*, 2021. **121**(8): p. 2349-  
44 603 2359.
- 46 604 34. Mattison, J.A., et al., *Caloric restriction improves health and survival of rhesus*  
47 605 *monkeys*. *Nature Communications*, 2017. **8**(1): p. 14063.
- 48 606 35. Maifeld, A., et al., *Fasting alters the gut microbiome reducing blood pressure and*  
49 607 *body weight in metabolic syndrome patients*. *Nature Communications*, 2021. **12**(1):  
50 608 p. 1970.
- 52 609 36. Choi, I.Y., et al., *A Diet Mimicking Fasting Promotes Regeneration and Reduces*  
53 610 *Autoimmunity and Multiple Sclerosis Symptoms*. *Cell Rep*, 2016. **15**(10): p. 2136-  
54 611 2146.
- 56 612 37. Jordan, S., et al., *Dietary Intake Regulates the Circulating Inflammatory Monocyte*  
57 613 *Pool*. *Cell*, 2019. **178**(5): p. 1102-1114.e17.
- 58 614 38. Neth, B.J., et al., *The Role of Intermittent Fasting in Parkinson's Disease*. *Front*  
59 615 *Neurol*, 2021. **12**: p. 682184.

- 1  
2  
3 616 39. Cignarella, F., et al., *Intermittent Fasting Confers Protection in CNS Autoimmunity by*  
4 617 *Altering the Gut Microbiota*. Cell Metab, 2018. **27**(6): p. 1222-1235.e6.
- 5 618 40. Mesnage, R., et al., *Changes in human gut microbiota composition are linked to the*  
6 619 *energy metabolic switch during 10 d of Buchinger fasting*. J Nutr Sci, 2019. **8**: p. e36.
- 7 620 41. Magne, F., et al., *The Firmicutes/Bacteroidetes Ratio: A Relevant Marker of Gut*  
8 621 *Dysbiosis in Obese Patients?* Nutrients, 2020. **12**(5).
- 9 622 42. Purchiaroni, F., et al., *The role of intestinal microbiota and the immune system*. Eur  
10 623 *Rev Med Pharmacol Sci*, 2013. **17**(3): p. 323-33.
- 11 624 43. Leeming, E.R., et al., *Effect of Diet on the Gut Microbiota: Rethinking Intervention*  
12 625 *Duration*. Nutrients, 2019. **11**(12): p. 2862.
- 13 626 44. Heintz-Buschart, A., et al., *Integrated multi-omics of the human gut microbiome in a*  
14 627 *case study of familial type 1 diabetes*. Nature Microbiology, 2016. **2**(1): p. 16180.
- 15 628 45. Narayanasamy, S., et al., *IMP: a pipeline for reproducible reference-independent*  
16 629 *integrated metagenomic and metatranscriptomic analyses*. Genome Biology, 2016.  
17 630 **17**(1): p. 260.
- 18 631 46. Wilmes, P., A. Heintz-Buschart, and P.L. Bond, *A decade of metaproteomics: where*  
19 632 *we stand and what the future holds*. Proteomics, 2015. **15**(20): p. 3409-17.
- 20 633 47. Gabel, K., et al., *Effects of 8-hour time restricted feeding on body weight and*  
21 634 *metabolic disease risk factors in obese adults: A pilot study*. Nutr Healthy Aging,  
22 635 2018. **4**(4): p. 345-353.
- 23 636 48. Hughes, A.J., et al., *A clinicopathologic study of 100 cases of Parkinson's disease*. Arch  
24 637 *Neurol*, 1993. **50**(2): p. 140-8.
- 25 638 49. Hoehn, M.M. and M.D. Yahr, *Parkinsonism. onset, progression, and mortality*, 1967.  
26 639 **17**(5): p. 427-427.
- 27 640 50. Kay, J. and K.S. Upchurch, *ACR/EULAR 2010 rheumatoid arthritis classification*  
28 641 *criteria*. Rheumatology (Oxford), 2012. **51 Suppl 6**: p. vi5-9.
- 29 642 51. Feng, X., et al., *Body Mass Index and the Risk of Rheumatoid Arthritis: An Updated*  
30 643 *Dose-Response Meta-Analysis*. Biomed Res Int, 2019. **2019**: p. 3579081.
- 31 644 52. Wells G, B.J., Teng J, et al, *Validation of the 28-joint Disease Activity Score (DAS28)*  
32 645 *and European League Against Rheumatism response criteria based on C-reactive*  
33 646 *protein against disease progression in patients with rheumatoid arthritis, and*  
34 647 *comparison with the DAS28 based on erythrocyte sedimentation rate*. Annals of the  
35 648 *Rheumatic Diseases* 2009. **68**: p. 954-960.
- 36 649 53. Trenkwalder, C., et al., *Parkinson's disease sleep scale--validation of the revised*  
37 650 *version PDSS-2*. Mov Disord, 2011. **26**(4): p. 644-52.
- 38 651 54. Bushnell, D.M. and M.L. Martin, *Quality of life and Parkinson's disease: translation*  
39 652 *and validation of the US Parkinson's Disease Questionnaire (PDQ-39)*. Qual Life Res,  
40 653 1999. **8**(4): p. 345-50.
- 41 654 55. Smolen, J.S., et al., *A simplified disease activity index for rheumatoid arthritis for use*  
42 655 *in clinical practice*. Rheumatology (Oxford), 2003. **42**(2): p. 244-57.
- 43 656 56. Raspe, H.H., Hagedorn, U., Kohlmann, T., & Mattussek, S., *Der Funktionsfragebogen*  
44 657 *Hannover (FFbH): Ein Instrument zur Funktionsdiagnostik bei polyartikulären*  
45 658 *Gelenkerkrankungen, in Ergebnisse sozialwissenschaftlicher Evaluation eines*  
46 659 *Modellversuchs (pp. 164-182)*. 1990, Schattauer Verlag.
- 47 660 57. Goetz, C.G., et al., *Movement Disorder Society-sponsored revision of the Unified*  
48 661 *Parkinson's Disease Rating Scale (MDS-UPDRS): Process, format, and clinimetric*  
49 662 *testing plan*. Mov Disord, 2007. **22**(1): p. 41-7.



- 1  
2  
3 663 58. Chaudhuri, K.R., et al., *International multicenter pilot study of the first*  
4 664 *comprehensive self-completed nonmotor symptoms questionnaire for Parkinson's*  
5 665 *disease: the NMSQuest study*. *Mov Disord*, 2006. **21**(7): p. 916-23.
- 6 666 59. Chaudhuri, K.R., et al., *The metric properties of a novel non-motor symptoms scale*  
7 667 *for Parkinson's disease: Results from an international pilot study*. *Mov Disord*, 2007.  
8 668 **22**(13): p. 1901-11.
- 9 669 60. Wolfe, F., *A brief clinical health assessment instrument clinhaq*. *Arthritis and*  
10 670 *Rheumatism*, 1989. **32**(4 Suppl): p. S99-S99.
- 11 671 61. Lewis, S.J. and K.W. Heaton, *Stool form scale as a useful guide to intestinal transit*  
12 672 *time*. *Scand J Gastroenterol*, 1997. **32**(9): p. 920-4.
- 13 673 62. Topp, C.W., et al., *The WHO-5 Well-Being Index: a systematic review of the literature*.  
14 674 *Psychother Psychosom*, 2015. **84**(3): p. 167-76.
- 15 675 63. Zigmond, A.S. and R.P. Snaith, *The hospital anxiety and depression scale*. *Acta*  
16 676 *Psychiatr Scand*, 1983. **67**(6): p. 361-70.
- 17 677 64. McNair DM, L.M., Droppleman LF, *Edits Manual for the Profile of Mood States*  
18 678 *(Poms)*. Rev ed. . San Diego: Educational and Industrial Testing Service, 1992.
- 19 679 65. Harris, P.A., et al., *Research electronic data capture (REDCap)--a metadata-driven*  
20 680 *methodology and workflow process for providing translational research informatics*  
21 681 *support*. *J Biomed Inform*, 2009. **42**(2): p. 377-81.
- 22 682 66. Wilmes, P., Roume, H., Hiller, K. & Cordes, T., *Method and kit for the isolation of*  
23 683 *genomic DNA, RNA, proteins and metabolites from a single biological sample.*, in  
24 684 *World Intellectual Property Organization, C.D.R.P.-G.L. Université Du Luxembourg,*  
25 685 *Editor. 2014: Switzerland.*
- 26 686 67. Roume, H., et al., *A biomolecular isolation framework for eco-systems biology*. *The*  
27 687 *ISME Journal*, 2013. **7**(1): p. 110-121.
- 28 688 68. Locati, M.D., et al., *Improving small RNA-seq by using a synthetic spike-in set for size-*  
29 689 *range quality control together with a set for data normalization*. *Nucleic Acids Res*,  
30 690 2015. **43**(14): p. e89.
- 31 691 69. Wampach, L., et al., *Birth mode is associated with earliest strain-conferred gut*  
32 692 *microbiome functions and immunostimulatory potential*. *Nature Communications*,  
33 693 2018. **9**(1): p. 5091.
- 34 694 70. Albanese, D. and C. Donati, *Strain profiling and epidemiology of bacterial species*  
35 695 *from metagenomic sequencing*. *Nature Communications*, 2017. **8**(1): p. 2260.
- 36 696 71. Vandeputte, D., et al., *Quantitative microbiome profiling links gut community*  
37 697 *variation to microbial load*. *Nature*, 2017. **551**(7681): p. 507-511.
- 38 698 72. Tang, H., S. Li, and Y. Ye, *A Graph-Centric Approach for Metagenome-Guided Peptide*  
39 699 *and Protein Identification in Metaproteomics*. *PLoS Comput Biol*, 2016. **12**(12): p.  
40 700 e1005224.
- 41 701 73. Tabb, D.L., C.G. Fernando, and M.C. Chambers, *MyriMatch: highly accurate tandem*  
42 702 *mass spectral peptide identification by multivariate hypergeometric analysis*. *J*  
43 703 *Proteome Res*, 2007. **6**(2): p. 654-61.
- 44 704 74. Heintz-Buschart, A., et al., *The nasal and gut microbiome in Parkinson's disease and*  
45 705 *idiopathic rapid eye movement sleep behavior disorder*. *Mov Disord*, 2018. **33**(1): p.  
46 706 88-98.
- 47 707 75. Chen, S.G., et al., *Exposure to the Functional Bacterial Amyloid Protein Curli Enhances*  
48 708 *Alpha-Synuclein Aggregation in Aged Fischer 344 Rats and Caenorhabditis elegans*.  
49 709 *Scientific Reports*, 2016. **6**(1): p. 34477.
- 50  
51  
52  
53  
54  
55  
56  
57  
58  
59  
60

- 1  
2  
3 710 76. Wilmes, P., et al., *Metabolome-proteome differentiation coupled to microbial*  
4 711 *divergence*. mBio, 2010. **1**(5).  
5 712 77. Kim, D.H., et al., *LC-MS-based absolute metabolite quantification: application to*  
6 713 *metabolic flux measurement in trypanosomes*. Metabolomics, 2015. **11**(6): p. 1721-  
7 714 1732.  
8 715 78. Lei, Z., D.V. Huhman, and L.W. Sumner, *Mass spectrometry strategies in*  
9 716 *metabolomics*. J Biol Chem, 2011. **286**(29): p. 25435-42.  
10 717 79. *Immunophenotyping assessment in a COVID-19 cohort (IMPACC): A prospective*  
11 718 *longitudinal study*. Sci Immunol, 2021. **6**(62).  
12 719 80. Shah, P., et al., *A microfluidics-based in vitro model of the gastrointestinal human-*  
13 720 *microbe interface*. Nature Communications, 2016. **7**(1): p. 11535.  
14 721 81. Aho, V.T.E., et al., *SnapShot: The Expobiome Map*. Cell Host Microbe, 2022. **30**(9): p.  
15 722 1340-1340.e1.  
16 723 82. Tusher, V.G., R. Tibshirani, and G. Chu, *Significance analysis of microarrays applied to*  
17 724 *the ionizing radiation response*. Proc Natl Acad Sci U S A, 2001. **98**(9): p. 5116-21.  
18 725 83. Finnell, J.S., et al., *Is fasting safe? A chart review of adverse events during medically*  
19 726 *supervised, water-only fasting*. BMC Complementary and Alternative Medicine,  
20 727 2018. **18**(1): p. 67.  
21 728 84. Chan, A.-W., et al., *SPIRIT 2013 explanation and elaboration: guidance for protocols*  
22 729 *of clinical trials*. BMJ : British Medical Journal, 2013. **346**: p. e7586.  
23 730

## 731 Figure Legends

732 Figure 1. Study design. This figure illustrates the study design with five different arms in  
733 total, two of which continue with the longitudinal part of the study. Visits take place at the  
734 clinical sites at each timepoint and include the collection of the displayed samples. This  
735 image was generated using Biorender software (<http://www.biorender.com>). T, timepoint;  
736 W, week; D, day; M, month.



Figure 1. Study design. This figure illustrates the study design with five different arms in total, two of which continue with the longitudinal part of the study. Visits take place at the clinical sites at each timepoint and include the collection of the displayed samples. This image was generated using Biorender software (<http://www.biorender.com>). T, timepoint; W, week; D, day; M, month.

279x177mm (600 x 600 DPI)

# Reporting checklist for protocol of a clinical trial.

Based on the SPIRIT guidelines.

## Instructions to authors

Complete this checklist by entering the page numbers from your manuscript where readers will find each of the items listed below.

Your article may not currently address all the items on the checklist. Please modify your text to include the missing information. If you are certain that an item does not apply, please write "n/a" and provide a short explanation.

Upload your completed checklist as an extra file when you submit to a journal.

In your methods section, say that you used the SPIRIT reporting guidelines, and cite them as:

Chan A-W, Tetzlaff JM, Gøtzsche PC, Altman DG, Mann H, Berlin J, Dickersin K, Hróbjartsson A, Schulz KF, Parulekar WR, Krleža-Jerić K, Laupacis A, Moher D. SPIRIT 2013 Explanation and Elaboration: Guidance for protocols of clinical trials. *BMJ*. 2013;346:e7586

|                                             |                     | Reporting Item                                                                                               | Page Number |
|---------------------------------------------|---------------------|--------------------------------------------------------------------------------------------------------------|-------------|
| <b>Administrative information</b>           |                     |                                                                                                              |             |
| Title                                       | <a href="#">#1</a>  | Descriptive title identifying the study design, population, interventions, and, if applicable, trial acronym | 1           |
| Trial registration                          | <a href="#">#2a</a> | Trial identifier and registry name. If not yet registered, name of intended registry                         | 2           |
| Trial registration: data set                | <a href="#">#2b</a> | All items from the World Health Organization Trial Registration Data Set                                     | n/a         |
| Protocol version                            | <a href="#">#3</a>  | Date and version identifier                                                                                  | n/a         |
| Funding                                     | <a href="#">#4</a>  | Sources and types of financial, material, and other support                                                  | 13          |
| Roles and responsibilities: contributorship | <a href="#">#5a</a> | Names, affiliations, and roles of protocol contributors                                                      | 1           |

|    |                           |                     |                                                                    |       |
|----|---------------------------|---------------------|--------------------------------------------------------------------|-------|
| 1  | Roles and                 | <a href="#">#5b</a> | Name and contact information for the trial sponsor                 | 1     |
| 2  | responsibilities:         |                     |                                                                    |       |
| 3  | sponsor contact           |                     |                                                                    |       |
| 4  | information               |                     |                                                                    |       |
| 5  |                           |                     |                                                                    |       |
| 6  |                           |                     |                                                                    |       |
| 7  |                           |                     |                                                                    |       |
| 8  | Roles and                 | <a href="#">#5c</a> | Role of study sponsor and funders, if any, in study design;        | 1, 13 |
| 9  | responsibilities:         |                     | collection, management, analysis, and interpretation of data;      |       |
| 10 | sponsor and funder        |                     | writing of the report; and the decision to submit the report for   |       |
| 11 |                           |                     | publication, including whether they will have ultimate authority   |       |
| 12 |                           |                     | over any of these activities                                       |       |
| 13 |                           |                     |                                                                    |       |
| 14 |                           |                     |                                                                    |       |
| 15 |                           |                     |                                                                    |       |
| 16 | Roles and                 | <a href="#">#5d</a> | Composition, roles, and responsibilities of the coordinating       | 1, 13 |
| 17 | responsibilities:         |                     | centre, steering committee, endpoint adjudication committee,       |       |
| 18 | committees                |                     | data management team, and other individuals or groups              |       |
| 19 |                           |                     | overseeing the trial, if applicable (see Item 21a for data         |       |
| 20 |                           |                     | monitoring committee)                                              |       |
| 21 |                           |                     |                                                                    |       |
| 22 |                           |                     |                                                                    |       |
| 23 |                           |                     |                                                                    |       |
| 24 | <b>Introduction</b>       |                     |                                                                    |       |
| 25 |                           |                     |                                                                    |       |
| 26 |                           |                     |                                                                    |       |
| 27 | Background and            | <a href="#">#6a</a> | Description of research question and justification for undertaking | 5     |
| 28 | rationale                 |                     | the trial, including summary of relevant studies (published and    |       |
| 29 |                           |                     | unpublished) examining benefits and harms for each intervention    |       |
| 30 |                           |                     |                                                                    |       |
| 31 |                           |                     |                                                                    |       |
| 32 | Background and            | <a href="#">#6b</a> | Explanation for choice of comparators                              | 5     |
| 33 | rationale: choice of      |                     |                                                                    |       |
| 34 | comparators               |                     |                                                                    |       |
| 35 |                           |                     |                                                                    |       |
| 36 |                           |                     |                                                                    |       |
| 37 | Objectives                | <a href="#">#7</a>  | Specific objectives or hypotheses                                  | 5     |
| 38 |                           |                     |                                                                    |       |
| 39 |                           |                     |                                                                    |       |
| 40 | Trial design              | <a href="#">#8</a>  | Description of trial design including type of trial (eg, parallel  | 5     |
| 41 |                           |                     | group, crossover, factorial, single group), allocation ratio, and  |       |
| 42 |                           |                     | framework (eg, superiority, equivalence, non-inferiority,          |       |
| 43 |                           |                     | exploratory)                                                       |       |
| 44 |                           |                     |                                                                    |       |
| 45 |                           |                     |                                                                    |       |
| 46 | <b>Methods:</b>           |                     |                                                                    |       |
| 47 | <b>Participants,</b>      |                     |                                                                    |       |
| 48 | <b>interventions, and</b> |                     |                                                                    |       |
| 49 | <b>outcomes</b>           |                     |                                                                    |       |
| 50 |                           |                     |                                                                    |       |
| 51 |                           |                     |                                                                    |       |
| 52 |                           |                     |                                                                    |       |
| 53 | Study setting             | <a href="#">#9</a>  | Description of study settings (eg, community clinic, academic      | 6     |
| 54 |                           |                     | hospital) and list of countries where data will be collected.      |       |
| 55 |                           |                     | Reference to where list of study sites can be obtained             |       |
| 56 |                           |                     |                                                                    |       |
| 57 |                           |                     |                                                                    |       |
| 58 |                           |                     |                                                                    |       |
| 59 |                           |                     |                                                                    |       |
| 60 |                           |                     |                                                                    |       |

|    |                              |                      |                                                                                                                                                                                                                                                                                                                                                                                |     |
|----|------------------------------|----------------------|--------------------------------------------------------------------------------------------------------------------------------------------------------------------------------------------------------------------------------------------------------------------------------------------------------------------------------------------------------------------------------|-----|
| 1  | Eligibility criteria         | <a href="#">#10</a>  | Inclusion and exclusion criteria for participants. If applicable, eligibility criteria for study centres and individuals who will perform the interventions (eg, surgeons, psychotherapists)                                                                                                                                                                                   | 6   |
| 2  |                              |                      |                                                                                                                                                                                                                                                                                                                                                                                |     |
| 3  |                              |                      |                                                                                                                                                                                                                                                                                                                                                                                |     |
| 4  |                              |                      |                                                                                                                                                                                                                                                                                                                                                                                |     |
| 5  |                              |                      |                                                                                                                                                                                                                                                                                                                                                                                |     |
| 6  | Interventions:               | <a href="#">#11a</a> | Interventions for each group with sufficient detail to allow replication, including how and when they will be administered                                                                                                                                                                                                                                                     | 5,7 |
| 7  | description                  |                      |                                                                                                                                                                                                                                                                                                                                                                                |     |
| 8  |                              |                      |                                                                                                                                                                                                                                                                                                                                                                                |     |
| 9  |                              |                      |                                                                                                                                                                                                                                                                                                                                                                                |     |
| 10 | Interventions:               | <a href="#">#11b</a> | Criteria for discontinuing or modifying allocated interventions for a given trial participant (eg, drug dose change in response to harms, participant request, or improving / worsening disease)                                                                                                                                                                               | 5,7 |
| 11 | modifications                |                      |                                                                                                                                                                                                                                                                                                                                                                                |     |
| 12 |                              |                      |                                                                                                                                                                                                                                                                                                                                                                                |     |
| 13 |                              |                      |                                                                                                                                                                                                                                                                                                                                                                                |     |
| 14 |                              |                      |                                                                                                                                                                                                                                                                                                                                                                                |     |
| 15 | Interventions:               | <a href="#">#11c</a> | Strategies to improve adherence to intervention protocols, and any procedures for monitoring adherence (eg, drug tablet return; laboratory tests)                                                                                                                                                                                                                              | 7   |
| 16 | adherence                    |                      |                                                                                                                                                                                                                                                                                                                                                                                |     |
| 17 |                              |                      |                                                                                                                                                                                                                                                                                                                                                                                |     |
| 18 |                              |                      |                                                                                                                                                                                                                                                                                                                                                                                |     |
| 19 |                              |                      |                                                                                                                                                                                                                                                                                                                                                                                |     |
| 20 |                              |                      |                                                                                                                                                                                                                                                                                                                                                                                |     |
| 21 | Interventions:               | <a href="#">#11d</a> | Relevant concomitant care and interventions that are permitted or prohibited during the trial                                                                                                                                                                                                                                                                                  | 6,7 |
| 22 | concomitant care             |                      |                                                                                                                                                                                                                                                                                                                                                                                |     |
| 23 |                              |                      |                                                                                                                                                                                                                                                                                                                                                                                |     |
| 24 |                              |                      |                                                                                                                                                                                                                                                                                                                                                                                |     |
| 25 | Outcomes                     | <a href="#">#12</a>  | Primary, secondary, and other outcomes, including the specific measurement variable (eg, systolic blood pressure), analysis metric (eg, change from baseline, final value, time to event), method of aggregation (eg, median, proportion), and time point for each outcome. Explanation of the clinical relevance of chosen efficacy and harm outcomes is strongly recommended | 10f |
| 26 |                              |                      |                                                                                                                                                                                                                                                                                                                                                                                |     |
| 27 |                              |                      |                                                                                                                                                                                                                                                                                                                                                                                |     |
| 28 |                              |                      |                                                                                                                                                                                                                                                                                                                                                                                |     |
| 29 |                              |                      |                                                                                                                                                                                                                                                                                                                                                                                |     |
| 30 |                              |                      |                                                                                                                                                                                                                                                                                                                                                                                |     |
| 31 |                              |                      |                                                                                                                                                                                                                                                                                                                                                                                |     |
| 32 |                              |                      |                                                                                                                                                                                                                                                                                                                                                                                |     |
| 33 |                              |                      |                                                                                                                                                                                                                                                                                                                                                                                |     |
| 34 | Participant timeline         | <a href="#">#13</a>  | Time schedule of enrolment, interventions (including any run-ins and washouts), assessments, and visits for participants. A schematic diagram is highly recommended (see Figure)                                                                                                                                                                                               | 5   |
| 35 |                              |                      |                                                                                                                                                                                                                                                                                                                                                                                |     |
| 36 |                              |                      |                                                                                                                                                                                                                                                                                                                                                                                |     |
| 37 |                              |                      |                                                                                                                                                                                                                                                                                                                                                                                |     |
| 38 |                              |                      |                                                                                                                                                                                                                                                                                                                                                                                |     |
| 39 |                              |                      |                                                                                                                                                                                                                                                                                                                                                                                |     |
| 40 | Sample size                  | <a href="#">#14</a>  | Estimated number of participants needed to achieve study objectives and how it was determined, including clinical and statistical assumptions supporting any sample size calculations                                                                                                                                                                                          | 12  |
| 41 |                              |                      |                                                                                                                                                                                                                                                                                                                                                                                |     |
| 42 |                              |                      |                                                                                                                                                                                                                                                                                                                                                                                |     |
| 43 |                              |                      |                                                                                                                                                                                                                                                                                                                                                                                |     |
| 44 |                              |                      |                                                                                                                                                                                                                                                                                                                                                                                |     |
| 45 | Recruitment                  | <a href="#">#15</a>  | Strategies for achieving adequate participant enrolment to reach target sample size                                                                                                                                                                                                                                                                                            | 5   |
| 46 |                              |                      |                                                                                                                                                                                                                                                                                                                                                                                |     |
| 47 |                              |                      |                                                                                                                                                                                                                                                                                                                                                                                |     |
| 48 |                              |                      |                                                                                                                                                                                                                                                                                                                                                                                |     |
| 49 | <b>Methods: Assignment</b>   |                      |                                                                                                                                                                                                                                                                                                                                                                                |     |
| 50 | <b>of interventions (for</b> |                      |                                                                                                                                                                                                                                                                                                                                                                                |     |
| 51 | <b>controlled trials)</b>    |                      |                                                                                                                                                                                                                                                                                                                                                                                |     |
| 52 |                              |                      |                                                                                                                                                                                                                                                                                                                                                                                |     |
| 53 |                              |                      |                                                                                                                                                                                                                                                                                                                                                                                |     |
| 54 | Allocation: sequence         | <a href="#">#16a</a> | Method of generating the allocation sequence (eg, computer-generated random numbers), and list of any factors for stratification. To reduce predictability of a random sequence, details of any planned restriction (eg, blocking) should be                                                                                                                                   | n/a |
| 55 | generation                   |                      |                                                                                                                                                                                                                                                                                                                                                                                |     |
| 56 |                              |                      |                                                                                                                                                                                                                                                                                                                                                                                |     |
| 57 |                              |                      |                                                                                                                                                                                                                                                                                                                                                                                |     |
| 58 |                              |                      |                                                                                                                                                                                                                                                                                                                                                                                |     |
| 59 |                              |                      |                                                                                                                                                                                                                                                                                                                                                                                |     |
| 60 |                              |                      |                                                                                                                                                                                                                                                                                                                                                                                |     |

provided in a separate document that is unavailable to those who enrol participants or assign interventions

|    |                        |                      |                                                                     |
|----|------------------------|----------------------|---------------------------------------------------------------------|
| 1  |                        |                      |                                                                     |
| 2  |                        |                      |                                                                     |
| 3  |                        |                      |                                                                     |
| 4  | Allocation             | <a href="#">#16b</a> | Mechanism of implementing the allocation sequence (eg, central      |
| 5  | concealment            |                      | telephone; sequentially numbered, opaque, sealed envelopes),        |
| 6  |                        |                      | describing any steps to conceal the sequence until interventions    |
| 7  | mechanism              |                      | are assigned                                                        |
| 8  |                        |                      |                                                                     |
| 9  |                        |                      |                                                                     |
| 10 |                        |                      |                                                                     |
| 11 | Allocation:            | <a href="#">#16c</a> | Who will generate the allocation sequence, who will enrol           |
| 12 | implementation         |                      | participants, and who will assign participants to interventions     |
| 13 |                        |                      |                                                                     |
| 14 | Blinding (masking)     | <a href="#">#17a</a> | Who will be blinded after assignment to interventions (eg, trial    |
| 15 |                        |                      | participants, care providers, outcome assessors, data analysts),    |
| 16 |                        |                      | and how                                                             |
| 17 |                        |                      |                                                                     |
| 18 |                        |                      |                                                                     |
| 19 |                        |                      |                                                                     |
| 20 | Blinding (masking):    | <a href="#">#17b</a> | If blinded, circumstances under which unblinding is permissible,    |
| 21 | emergency unblinding   |                      | and procedure for revealing a participant's allocated intervention  |
| 22 |                        |                      | during the trial                                                    |
| 23 |                        |                      |                                                                     |
| 24 |                        |                      |                                                                     |
| 25 | <b>Methods: Data</b>   |                      |                                                                     |
| 26 | <b>collection,</b>     |                      |                                                                     |
| 27 | <b>management, and</b> |                      |                                                                     |
| 28 | <b>analysis</b>        |                      |                                                                     |
| 29 |                        |                      |                                                                     |
| 30 |                        |                      |                                                                     |
| 31 |                        |                      |                                                                     |
| 32 | Data collection plan   | <a href="#">#18a</a> | Plans for assessment and collection of outcome, baseline, and       |
| 33 |                        |                      | other trial data, including any related processes to promote data   |
| 34 |                        |                      | quality (eg, duplicate measurements, training of assessors) and a   |
| 35 |                        |                      | description of study instruments (eg, questionnaires, laboratory    |
| 36 |                        |                      | tests) along with their reliability and validity, if known.         |
| 37 |                        |                      | Reference to where data collection forms can be found, if not in    |
| 38 |                        |                      | the protocol                                                        |
| 39 |                        |                      |                                                                     |
| 40 |                        |                      |                                                                     |
| 41 |                        |                      |                                                                     |
| 42 |                        |                      |                                                                     |
| 43 | Data collection plan:  | <a href="#">#18b</a> | Plans to promote participant retention and complete follow-up,      |
| 44 | retention              |                      | including list of any outcome data to be collected for participants |
| 45 |                        |                      | who discontinue or deviate from intervention protocols              |
| 46 |                        |                      |                                                                     |
| 47 |                        |                      |                                                                     |
| 48 | Data management        | <a href="#">#19</a>  | Plans for data entry, coding, security, and storage, including any  |
| 49 |                        |                      | related processes to promote data quality (eg, double data entry;   |
| 50 |                        |                      | range checks for data values). Reference to where details of data   |
| 51 |                        |                      | management procedures can be found, if not in the protocol          |
| 52 |                        |                      |                                                                     |
| 53 |                        |                      |                                                                     |
| 54 |                        |                      |                                                                     |
| 55 | Statistics: outcomes   | <a href="#">#20a</a> | Statistical methods for analysing primary and secondary             |
| 56 |                        |                      | outcomes. Reference to where other details of the statistical       |
| 57 |                        |                      | analysis plan can be found, if not in the protocol                  |
| 58 |                        |                      |                                                                     |
| 59 |                        |                      |                                                                     |
| 60 |                        |                      |                                                                     |

|    |                            |                      |                                                                    |       |
|----|----------------------------|----------------------|--------------------------------------------------------------------|-------|
| 1  | Statistics: additional     | <a href="#">#20b</a> | Methods for any additional analyses (eg, subgroup and adjusted     | 12f   |
| 2  | analyses                   |                      | analyses)                                                          |       |
| 3  |                            |                      |                                                                    |       |
| 4  | Statistics: analysis       | <a href="#">#20c</a> | Definition of analysis population relating to protocol non-        | 12f   |
| 5  | population and missing     |                      | adherence (eg, as randomised analysis), and any statistical        |       |
| 6  | data                       |                      | methods to handle missing data (eg, multiple imputation)           |       |
| 7  |                            |                      |                                                                    |       |
| 8  |                            |                      |                                                                    |       |
| 9  |                            |                      |                                                                    |       |
| 10 | <b>Methods: Monitoring</b> |                      |                                                                    |       |
| 11 |                            |                      |                                                                    |       |
| 12 | Data monitoring:           | <a href="#">#21a</a> | Composition of data monitoring committee (DMC); summary of         | 12f   |
| 13 | formal committee           |                      | its role and reporting structure; statement of whether it is       |       |
| 14 |                            |                      | independent from the sponsor and competing interests; and          |       |
| 15 |                            |                      | reference to where further details about its charter can be found, |       |
| 16 |                            |                      | if not in the protocol. Alternatively, an explanation of why a     |       |
| 17 |                            |                      | DMC is not needed                                                  |       |
| 18 |                            |                      |                                                                    |       |
| 19 |                            |                      |                                                                    |       |
| 20 |                            |                      |                                                                    |       |
| 21 |                            |                      |                                                                    |       |
| 22 | Data monitoring:           | <a href="#">#21b</a> | Description of any interim analyses and stopping guidelines,       | n/a   |
| 23 | interim analysis           |                      | including who will have access to these interim results and make   |       |
| 24 |                            |                      | the final decision to terminate the trial                          |       |
| 25 |                            |                      |                                                                    |       |
| 26 |                            |                      |                                                                    |       |
| 27 | Harms                      | <a href="#">#22</a>  | Plans for collecting, assessing, reporting, and managing solicited | 12    |
| 28 |                            |                      | and spontaneously reported adverse events and other unintended     |       |
| 29 |                            |                      | effects of trial interventions or trial conduct                    |       |
| 30 |                            |                      |                                                                    |       |
| 31 |                            |                      |                                                                    |       |
| 32 |                            |                      |                                                                    |       |
| 33 | Auditing                   | <a href="#">#23</a>  | Frequency and procedures for auditing trial conduct, if any, and   | n/a   |
| 34 |                            |                      | whether the process will be independent from investigators and     |       |
| 35 |                            |                      | the sponsor                                                        |       |
| 36 |                            |                      |                                                                    |       |
| 37 |                            |                      |                                                                    |       |
| 38 | <b>Ethics and</b>          |                      |                                                                    |       |
| 39 | <b>dissemination</b>       |                      |                                                                    |       |
| 40 |                            |                      |                                                                    |       |
| 41 |                            |                      |                                                                    |       |
| 42 | Research ethics            | <a href="#">#24</a>  | Plans for seeking research ethics committee / institutional review | 2     |
| 43 | approval                   |                      | board (REC / IRB) approval                                         |       |
| 44 |                            |                      |                                                                    |       |
| 45 |                            |                      |                                                                    |       |
| 46 | Protocol amendments        | <a href="#">#25</a>  | Plans for communicating important protocol modifications (eg,      | 2, 13 |
| 47 |                            |                      | changes to eligibility criteria, outcomes, analyses) to relevant   |       |
| 48 |                            |                      | parties (eg, investigators, REC / IRBs, trial participants, trial  |       |
| 49 |                            |                      | registries, journals, regulators)                                  |       |
| 50 |                            |                      |                                                                    |       |
| 51 |                            |                      |                                                                    |       |
| 52 |                            |                      |                                                                    |       |
| 53 | Consent or assent          | <a href="#">#26a</a> | Who will obtain informed consent or assent from potential trial    | 6     |
| 54 |                            |                      | participants or authorised surrogates, and how (see Item 32)       |       |
| 55 |                            |                      |                                                                    |       |
| 56 |                            |                      |                                                                    |       |
| 57 |                            |                      |                                                                    |       |
| 58 |                            |                      |                                                                    |       |
| 59 |                            |                      |                                                                    |       |
| 60 |                            |                      |                                                                    |       |



|    |                          |                      |                                                                      |       |
|----|--------------------------|----------------------|----------------------------------------------------------------------|-------|
| 1  | Consent or assent:       | <a href="#">#26b</a> | Additional consent provisions for collection and use of              | 6     |
| 2  | ancillary studies        |                      | participant data and biological specimens in ancillary studies, if   |       |
| 3  |                          |                      | applicable                                                           |       |
| 4  |                          |                      |                                                                      |       |
| 5  |                          |                      |                                                                      |       |
| 6  | Confidentiality          | <a href="#">#27</a>  | How personal information about potential and enrolled                | 12    |
| 7  |                          |                      | participants will be collected, shared, and maintained in order to   |       |
| 8  |                          |                      | protect confidentiality before, during, and after the trial          |       |
| 9  |                          |                      |                                                                      |       |
| 10 |                          |                      |                                                                      |       |
| 11 | Declaration of interests | <a href="#">#28</a>  | Financial and other competing interests for principal investigators  | 13    |
| 12 |                          |                      | for the overall trial and each study site                            |       |
| 13 |                          |                      |                                                                      |       |
| 14 |                          |                      |                                                                      |       |
| 15 | Data access              | <a href="#">#29</a>  | Statement of who will have access to the final trial dataset, and    | 12f   |
| 16 |                          |                      | disclosure of contractual agreements that limit such access for      |       |
| 17 |                          |                      | investigators                                                        |       |
| 18 |                          |                      |                                                                      |       |
| 19 |                          |                      |                                                                      |       |
| 20 | Ancillary and post trial | <a href="#">#30</a>  | Provisions, if any, for ancillary and post-trial care, and for       | n/a   |
| 21 | care                     |                      | compensation to those who suffer harm from trial participation       |       |
| 22 |                          |                      |                                                                      |       |
| 23 |                          |                      |                                                                      |       |
| 24 | Dissemination policy:    | <a href="#">#31a</a> | Plans for investigators and sponsor to communicate trial results     | 2, 13 |
| 25 | trial results            |                      | to participants, healthcare professionals, the public, and other     |       |
| 26 |                          |                      | relevant groups (eg, via publication, reporting in results           |       |
| 27 |                          |                      | databases, or other data sharing arrangements), including any        |       |
| 28 |                          |                      | publication restrictions                                             |       |
| 29 |                          |                      |                                                                      |       |
| 30 |                          |                      |                                                                      |       |
| 31 |                          |                      |                                                                      |       |
| 32 |                          |                      |                                                                      |       |
| 33 | Dissemination policy:    | <a href="#">#31b</a> | Authorship eligibility guidelines and any intended use of            | 13    |
| 34 | authorship               |                      | professional writers                                                 |       |
| 35 |                          |                      |                                                                      |       |
| 36 |                          |                      |                                                                      |       |
| 37 | Dissemination policy:    | <a href="#">#31c</a> | Plans, if any, for granting public access to the full protocol,      | n/a   |
| 38 | reproducible research    |                      | participant-level dataset, and statistical code                      |       |
| 39 |                          |                      |                                                                      |       |
| 40 |                          |                      |                                                                      |       |
| 41 | <b>Appendices</b>        |                      |                                                                      |       |
| 42 |                          |                      |                                                                      |       |
| 43 | Informed consent         | <a href="#">#32</a>  | Model consent form and other related documentation given to          | 6     |
| 44 | materials                |                      | participants and authorised surrogates                               |       |
| 45 |                          |                      |                                                                      |       |
| 46 |                          |                      |                                                                      |       |
| 47 | Biological specimens     | <a href="#">#33</a>  | Plans for collection, laboratory evaluation, and storage of          | 7     |
| 48 |                          |                      | biological specimens for genetic or molecular analysis in the        |       |
| 49 |                          |                      | current trial and for future use in ancillary studies, if applicable |       |
| 50 |                          |                      |                                                                      |       |
| 51 |                          |                      |                                                                      |       |

The SPIRIT Explanation and Elaboration paper is distributed under the terms of the Creative Commons Attribution License CC-BY-NC. This checklist was completed on 07. November 2022 using <https://www.goodreports.org/>, a tool made by the [EQUATOR Network](#) in collaboration with [Penelope.ai](#)
